# Supplementary material
Source: publisher figshare collection journal article supplement (https://acs.figshare.com/ndownloader/files/3700273)
Supplement: Supplementary file 1 [file 3700273]

# Supporting Information

## Organocatalyzed Asymmetric 1,6-Conjugate Addition of *para*-Quinone Methides with Dicyanoolefins

Xuanyi Li, Xiuyan Xu, Weiwei Wei, Aijun Lin\*, and Hequan Yao\*

*State Key Laboratory of Natural Medicines and Department of Medicinal Chemistry,*

*China Pharmaceutical University, Nanjing 210009, P. R. China.*

E-mail: ajlin@cpu.edu.cn, hyao@cpu.edu.cn

### Contents

|                                                                                                                         |    |
|-------------------------------------------------------------------------------------------------------------------------|----|
| 1. General Information .....                                                                                            | 2  |
| 2. General procedure for preparation of dicyanoolefin <sup>1</sup> .....                                                | 2  |
| 3. Preparation of <i>p</i> -QMs <sup>2</sup> .....                                                                      | 3  |
| 4. General Procedure for the asymmetric 1,6-conjugate Addition of Dicyanoolefins to <i>para</i> -Quinone Methides ..... | 3  |
| 5. Removal or functionalization of the <i>tert</i> -butyl groups and dicyanoolefin .....                                | 15 |
| 6. References .....                                                                                                     | 16 |
| 7. <sup>1</sup> H and <sup>13</sup> C-NMR Spectra of Title Compounds.....                                               | 17 |
| 8. HPLC analysis.....                                                                                                   | 45 |
| 9. X-ray crystal structure of 3ae.....                                                                                  | 73 |

## 1. General Information

**Reagents and Solvents:** PE refers to petroleum ether (b.p. 60-90 °C) and EA refers to ethyl acetate. All other starting materials and solvents were commercially available and were used without further purification unless otherwise stated.

**Chromatography:** Flash column chromatography was carried out using commercially available 200-300 mesh under pressure unless otherwise indicated. Gradient flash chromatography was conducted eluting with PE/EA, they are listed as volume/volume ratios.

**Data collection:**  $^1\text{H}$  and  $^{13}\text{C}$  NMR spectra were collected on BRUKER AV-300 (300 MHz) spectrometer using  $\text{CDCl}_3$  or DMSO as solvent. Chemical shifts of  $^1\text{H}$  NMR were recorded in parts per million (ppm,  $\delta$ ) relative to tetramethylsilane ( $\delta = 0.00$  ppm) with the solvent resonance as an internal standard ( $\text{CDCl}_3$ :  $\delta = 7.26$  ppm). Data are reported as follows: chemical shift in ppm ( $\delta$ ), multiplicity (s = singlet, d = doublet, t = triplet, q = quartet, brs = broad singlet, m = multiplet), coupling constant (Hz), and integration. Chemical shifts of  $^{13}\text{C}$  NMR were reported in ppm with the solvent as the internal standard ( $\text{CDCl}_3$ :  $\delta = 77.0$  ppm). High Resolution Mass measurement was performed on Agilent QTOF 6520 mass spectrometer with electron spray ionization (ESI) as the ion source. Melting point (m.p.) was measured on a microscopic melting point apparatus.

## 2. General procedure for preparation of dicyanoolefin<sup>1</sup>

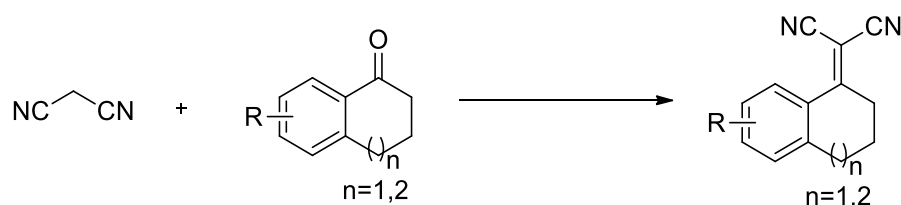

Malononitrile (32 mmol) and the ketone (28 mmol) were dissolved in 20 mL of toluene containing ammonium acetate (500 mg, 6.5 mmol) and glacial acetic acid (2 mL) in a 50 mL flask. By refluxing vigorously, the water formed in the reaction was removed by a Dean and Stark trap placed under the reflux condenser. Evaporation of the toluene left a residue that was recrystallized from alcohol or distilled under vacuum to give pure products (**1a-1l**)

### 3. Preparation of *p*-QMs<sup>2</sup>

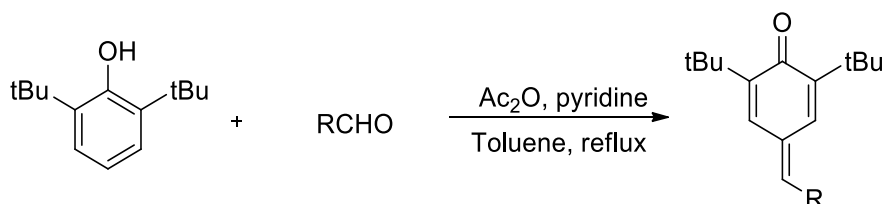

Aldehydes (10 mmol) were added to a solution of phenols (10 mmol) in toluene (40 mL). The reaction mixture was heated in a Dean-Stark apparatus to reflux. Piperidine (20 mmol) was added dropwise over 1 h, and the reaction mixture continued to reflux for 3 h. After the mixture had cooled just below the boiling point of toluene, acetic anhydride (20 mmol) was added, and then the solution was stirred for 15 min. The residue was extracted three times with dichloromethane. The combined organic layers were washed with water and brine sequentially, dried over Na<sub>2</sub>SO<sub>4</sub>, filtered, and concentrated. The crude product was purified by flash column chromatography on silica gel to afford the corresponding product **2a-2q**.

### 4. General Procedure for the asymmetric 1,6-conjugate Addition of Dicyanoolefins to *para*-Quinone Methides

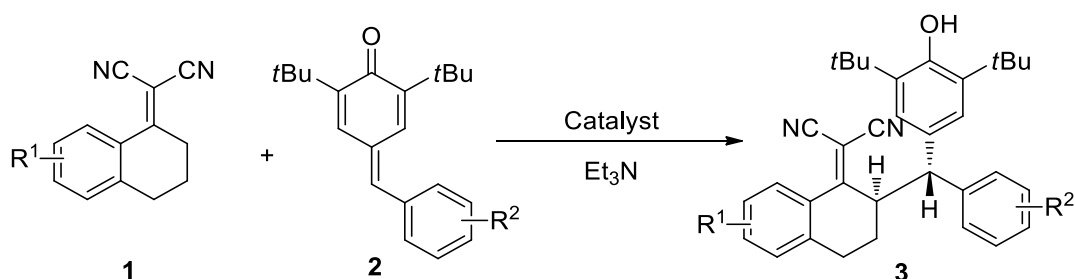

In a 10 mL test tube was sequentially added dicyanoolefin **1** (0.1 mmol, 1 equiv), *p*-QMs **2** (0.1 mmol, 1 equiv), catalyst (0.02 mmol, 20 mol %) and solvent (1 mL). Then, the temperature was decreased to -40 °C. Finally, Et<sub>3</sub>N (0.15 mmol, 1.5 equiv) was added. The tube was sealed and stirred at -40 °C. After the reaction was completed (detected by TLC), solvent was directly removed under reduce pressure and the crude mixture was purified by flash column chromatography on silica gel to afford the pure product.

### a) Characterization of the Products

#### 2-((R)-2-((S)-(3,5-di-tert-butyl-4-hydroxyphenyl)(phenyl)methyl)-3,4-dihydronaphthalen-1(2H)-ylidene)malononitrile (3aa)

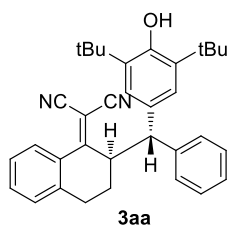

yield 76% (39.4 mg); white solid, m.p. 214-216 °C;  $^1\text{H}$  NMR (300 MHz,  $\text{CDCl}_3$ )  $\delta$  7.63-7.57 (m, 1H), 7.54-7.50(m, 1H), 7.47-7.40 (m, 2H), 7.39-7.28 (m, 4H), 7.33-7.24 (m, 1H), 6.74 (s, 2H), 5.12 (s, 1H), 4.19-4.12 (m, 1H), 3.73-3.68 (m, 1H), 3.15-2.89 (m, 2H), 2.14-1.92 (m, 2H), 1.36 (s, 18H) ppm;  $^{13}\text{C}$  NMR (75 MHz,  $\text{CDCl}_3$ )  $\delta$  177.3, 152.9, 141.2, 139.7, 135.8, 133.4, 131.7, 129.9, 129.4, 129.0, 128.8, 128.0, 127.1, 126.5, 124.3, 113.7, 113.5, 80.5, 52.6, 47.4, 34.4, 30.1, 25.5, 24.3 ppm;  $[\alpha]_{\text{D}}^{25} = -37.3$  (c = 0.3, EA); the dr value was evaluated by HPLC of the mixture and was found to be >20:1; the er value was determined by HPLC, using CHIRALCEL OD-H, *i*-PrOH: Hexane =1:99,  $\nu = 0.5$  mL/min,  $\lambda = 254$  nm, t (major) = 13.86 min, t (minor) = 18.22 min; er = 98:2; HRMS (ESI) calcd for  $[\text{C}_{34}\text{H}_{36}\text{N}_2\text{NaO}]^+$  511.2720, found 511.2713.

#### 2-((R)-2-((S)-(3,5-di-tert-butyl-4-hydroxyphenyl)(*p*-tolyl)methyl)-3,4-dihydronaphthalen-1(2H)-ylidene)malononitrile (3ab)

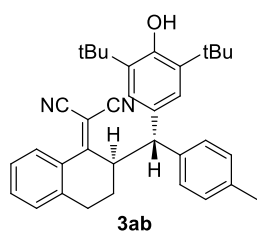

yield 84% (42.2 mg); white solid, m.p. 187-189 °C;  $^1\text{H}$  NMR (300 MHz,  $\text{CDCl}_3$ )  $\delta$  7.63 (d,  $J = 7.9$  Hz, 1H), 7.57-7.53 (m, 1H), 7.36-7.31 (m, 4H), 7.16 (d,  $J = 7.9$  Hz, 2H), 6.72 (s, 2H), 5.10 (s, 1H), 4.12-4.06 (m, 1H), 3.63 (d,  $J = 11.6$  Hz, 1H), 3.24-2.69 (m, 2H), 2.32 (s, 3H), 2.17-1.87 (m, 2H), 1.36 (s, 18H) ppm;  $^{13}\text{C}$  NMR (75 MHz,  $\text{CDCl}_3$ )  $\delta$  177.5, 152.8, 139.6, 138.1, 136.7, 135.7, 133.4, 131.9, 129.8, 129.6, 129.4, 128.8, 128.1, 127.7, 126.5, 124.2, 113.7, 113.5, 52.2, 47.4, 34.3, 30.1, 25.5, 24.2, 21.0 ppm;  $[\alpha]_{\text{D}}^{25} = -34.3$  (c = 0.3, EA); the dr value was evaluated by HPLC of the mixture and was found to be >20:1; the er value was determined by HPLC, using CHIRALCEL OD-H, *i*-PrOH: Hexane =1:99,  $\nu = 0.5$  mL/min,  $\lambda = 254$  nm, t (major) = 10.90 min, t (minor) = 14.56 min; er = 91:9; HRMS (ESI) calcd for  $[\text{C}_{35}\text{H}_{38}\text{KN}_2\text{O}]^+$  541.2616, found 541.2614.

#### 2-((R)-2-((S)-(3,5-di-tert-butyl-4-hydroxyphenyl)(4-fluorophenyl)methyl)-3,4-dihydronaphthalen-1(2H)-ylidene)malononitrile (3ac)

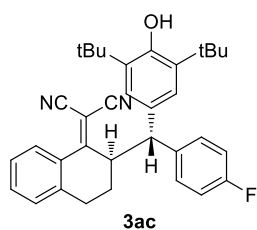

yield 81% (41.0 mg); white solid, m.p. 162-164 °C;  $^1\text{H}$  NMR (300 MHz,  $\text{CDCl}_3$ )  $\delta$  7.65 (d,  $J = 7.8$  Hz, 1H), 7.56 (t,  $J = 7.5$  Hz, 1H), 7.47-7.28 (m, 4H), 7.06 (t,  $J = 8.0$  Hz, 2H), 6.70 (s, 2H), 5.15 (s, 1H), 4.07 (d,  $J = 11.7$  Hz, 1H), 3.68 (d,  $J = 11.6$  Hz, 1H), 3.01-2.87 (m, 2H), 2.08-2.07 (m, 2H), 1.36 (s, 18H) ppm;  $^{13}\text{C}$  NMR (75 MHz,  $\text{CDCl}_3$ )  $\delta$  176.9, 163.5, 160.2, 152.9, 139.5, 137.0, 136.9, 136.0, 133.7, 133.5, 131.4, 129.8, 129.4, 129.3, 128.8, 126.9, 126.6,

124.2, 116.0, 115.7, 113.6, 113.4, 80.6, 51.8, 47.5, 34.4, 30.1, 25.4, 24.2 ppm;  $[\alpha]_D^{25} = -39.7$  ( $c = 0.3$ , EA); the dr value was evaluated by HPLC of the mixture and was found to be >20:1; the er value was determined by HPLC, using CHIRALCEL OD-H, *i*-PrOH: Hexane =1:99,  $\nu = 0.5$  mL/min,  $\lambda = 254$  nm,  $t$  (major) = 11.16 min,  $t$  (minor) = 14.47 min; er = 92:8; HRMS (ESI) calcd for  $[C_{34}H_{35}FN_2NaO]^+$  529.2626, found 529.2625.

**2-((*R*)-2-((*S*)-(4-chlorophenyl)(3,5-di-*tert*-butyl-4-hydroxyphenyl)methyl)-3,4-dihydronaphthalen-1(2*H*)-ylidene)malononitrile (3ad)**

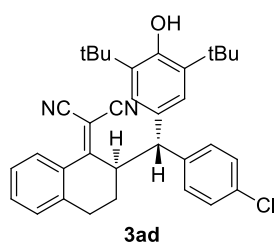

yield 82% (42.9 mg); white solid, m.p. 179-181 °C;  $^1H$  NMR (300 MHz,  $CDCl_3$ )  $\delta$  7.64 (d,  $J = 8.0$  Hz, 1H), 7.56-7.53 (m, 1H), 7.40-7.26 (m, 6H), 6.68 (s, 2H), 5.14 (s, 1H), 4.11-4.05 (m, 1H), 3.66 (d,  $J = 11.7$  Hz, 1H), 3.24-2.68 (m, 2H), 2.20-1.90 (m, 2H), 1.36 (s, 18H) ppm;  $^{13}C$  NMR (75 MHz,  $CDCl_3$ )  $\delta$  176.7, 153.0, 139.7, 139.4, 136.0, 133.5, 132.9, 131.1, 129.8, 129.2, 129.1, 128.8, 126.9, 126.6, 124.2, 113.5, 113.4, 80.7, 51.9, 47.2, 34.4, 30.1, 25.4, 24.2 ppm;  $[\alpha]_D^{25} = -31.3$  ( $c = 0.3$ , EA); the dr value was evaluated by HPLC of the mixture and was found to be >20:1; the er value was determined by HPLC, using CHIRALCEL OD-H, *i*-PrOH: Hexane =1:99,  $\nu = 0.5$  mL/min,  $\lambda = 254$  nm,  $t$  (major) = 11.58 min,  $t$  (minor) = 18.57 min; er = 95:5; HRMS (ESI) calcd for  $[C_{34}H_{35}ClKN_2O]^+$  561.2069, found 561.2059.

**2-((*R*)-2-((*S*)-(4-bromophenyl)(3,5-di-*tert*-butyl-4-hydroxyphenyl)methyl)-3,4-dihydronaphthalen-1(2*H*)-ylidene)malononitrile (3ae)**

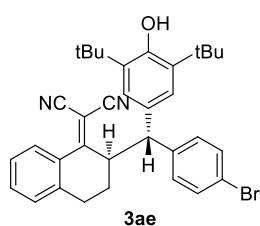

yield 99% (56.1 mg); white solid, m.p. 163-165 °C;  $^1H$  NMR (300 MHz,  $CDCl_3$ )  $\delta$  7.65 (d,  $J = 8.0$  Hz, 1H), 7.60-7.53 (m, 1H), 7.50 (d,  $J = 8.4$  Hz, 2H), 7.41-7.28 (m, 4H), 6.69 (s, 2H), 5.15 (s, 1H), 4.11-4.05 (m, 1H), 3.66 (d,  $J = 11.7$  Hz, 1H), 3.06-2.87 (m, 2H), 2.27-1.79 (m, 2H), 1.37 (s, 18H) ppm;  $^{13}C$  NMR (75 MHz,  $CDCl_3$ )  $\delta$  176.7, 153.0, 140.2, 139.4, 136.0, 133.5, 132.1, 131.0, 129.8, 129.6, 129.2, 128.8, 126.6, 124.2, 120.9, 113.5, 113.4, 80.7, 52.0, 47.1, 34.4, 30.1, 25.4, 24.2 ppm;  $[\alpha]_D^{25} = -36.7$  ( $c = 0.3$ , EA); the dr value was evaluated by HPLC of the mixture and was found to be >20:1; the er value was determined by HPLC, using CHIRALCEL OD-H, *i*-PrOH: Hexane =1:99,  $\nu = 0.5$  mL/min,  $\lambda = 254$  nm,  $t$  (major) = 12.04 min,  $t$  (minor) = 22.50 min; er = 99.5:0.5; HRMS (ESI) calcd for  $[C_{34}H_{35}BrKN_2O]^+$  605.1564, found 605.1549.

**2-((R)-2-((S)-(3,5-di-tert-butyl-4-hydroxyphenyl)(4-(trifluoromethyl)phenyl)methyl)-3,4-dihydronaphthalen-1(2H)-ylidene)malononitrile (3af)**

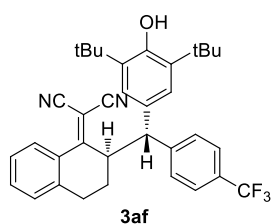

yield 91% (50.6 mg); white solid, m.p. 181-183 °C;  $^1\text{H}$  NMR (300 MHz,  $\text{CDCl}_3$ )  $\delta$  7.66-7.54 (m, 6H), 7.40 (t,  $J$  = 7.9 Hz, 2H), 6.76 (s, 2H), 5.21 (s, 1H), 4.19-4.12 (m, 1H), 3.80 (d,  $J$  = 11.7 Hz, 1H), 3.19-2.82 (m, 2H), 2.24-1.97 (m, 2H), 1.41 (s, 18H) ppm;  $^{13}\text{C}$  NMR (75 MHz,  $\text{CDCl}_3$ )  $\delta$  175.9, 152.6, 144.8, 138.8, 135.6, 133.1, 130.1, 129.4, 128.7, 128.3, 127.8, 126.4, 126.2, 125.6, 125.5, 125.4, 125.4, 123.8, 113.0, 112.9, 80.3, 51.9, 46.5, 33.9, 29.6, 24.9, 23.7 ppm;  $[\alpha]_{\text{D}}^{25}$  = -34.0 ( $c$  = 0.3, EA); the dr value was evaluated by HPLC of the mixture and was found to be >20:1; the er value was determined by HPLC, using CHIRALCEL OD-H, *i*-PrOH: Hexane = 1:99,  $\nu$  = 0.5 mL/min,  $\lambda$  = 254 nm,  $t$  (major) = 10.70 min,  $t$  (minor) = 14.98 min; er = 93:7; HRMS (ESI) calcd for  $[\text{C}_{35}\text{H}_{35}\text{F}_3\text{N}_2\text{NaO}]^+$  579.2594, found 579.2587.

**Methyl**

**4-((S)-(3,5-di-tert-butyl-4-hydroxyphenyl)((R)-1-(dicyanomethylene)-1,2,3,4-tetrahydronaphthalen-2-yl)methyl)benzoate (3ag)**

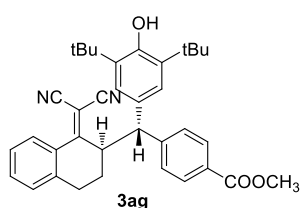

yield 78% (42.6 mg); white solid, m.p. 185-187 °C;  $^1\text{H}$  NMR (300 MHz,  $\text{CDCl}_3$ )  $\delta$  8.04 (d,  $J$  = 8.3 Hz, 2H), 7.66 (d,  $J$  = 7.9 Hz, 1H), 7.62-7.46 (m, 3H), 7.43-7.27 (m, 2H), 6.71 (s, 2H), 5.16 (s, 1H), 4.15 (d,  $J$  = 11.7 Hz, 1H), 3.90 (s, 3H), 3.75 (d,  $J$  = 11.7 Hz, 1H), 3.03-2.91 (m, 2H), 2.26-1.80 (m, 2H), 1.36 (s, 18H) ppm;  $^{13}\text{C}$  NMR (75 MHz,  $\text{CDCl}_3$ )  $\delta$  176.6, 166.8, 153.1, 146.3, 139.4, 136.0, 133.5, 130.7, 130.3, 129.9, 129.2, 129.0, 128.8, 128.0, 126.6, 124.3, 113.5, 113.4, 80.7, 52.5, 52.1, 47.0, 34.4, 30.3, 30.0, 25.4, 24.2 ppm;  $[\alpha]_{\text{D}}^{25}$  = -44.3 ( $c$  = 0.3, EA); the dr value was evaluated by HPLC of the mixture and was found to be >20:1; the er value was determined by HPLC, using CHIRALCEL OD-H, *i*-PrOH: Hexane = 1:99,  $\nu$  = 0.5 mL/min,  $\lambda$  = 254 nm,  $t$  (major) = 24.09 min,  $t$  (minor) = 33.69 min; er = 96:4; HRMS (ESI) calcd for  $[\text{C}_{36}\text{H}_{38}\text{N}_2\text{NaO}_3]^+$  569.2775, found 569.2768.

**2-((R)-2-((S)-(4-cyanophenyl)(3,5-di-tert-butyl-4-hydroxyphenyl)methyl)-3,4-dihydronaphthalen-1(2H)-ylidene)malononitrile (3ah)**

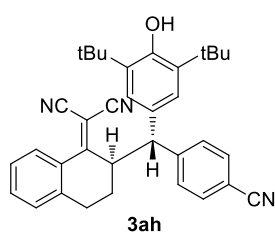

yield 78% (40.0 mg); white solid, m.p. 192-194 °C;  $^1\text{H}$  NMR (300 MHz,  $\text{CDCl}_3$ )  $\delta$  7.75-7.49 (m, 6H), 7.36 (t,  $J$  = 8.6 Hz, 2H), 6.66 (s, 2H), 5.19 (s, 1H), 4.17-4.10 (m, 1H), 3.74 (d,  $J$  = 11.7 Hz, 1H), 2.99-2.94 (m, 2H), 2.35-1.84 (m, 2H), 1.36 (s, 18H) ppm;  $^{13}\text{C}$  NMR (75 MHz,  $\text{CDCl}_3$ )  $\delta$  176.0, 153.2, 146.6, 139.2, 136.2, 133.6, 132.8, 130.1, 129.9, 129.1, 128.8, 128.7, 126.7, 124.3, 118.5, 113.4, 113.3, 111.1, 80.9, 52.5, 46.6, 34.4, 30.0, 25.3, 24.2 ppm;  $[\alpha]_{\text{D}}^{25}$  = -35.3

(*c* = 0.3, EA); the *dr* value was evaluated by HPLC of the mixture and was found to be 93:7; the *er* value was determined by HPLC, using CHIRALCEL OD-H, *i*-PrOH: Hexane = 1:99,  $\nu$  = 0.5 mL/min,  $\lambda$  = 254 nm, *t* (major) = 36.02 min, *t* (minor) = 46.09 min; *er* = 99.5:0.5; HRMS (ESI) calcd for  $[C_{35}H_{35}N_3NaO]^+$  536.2672, found 536.2658.

**2-((*R*)-2-((*S*)-(3,5-di-*tert*-butyl-4-hydroxyphenyl)(4-nitrophenyl)methyl)-3,4-dihydronaphthalen-1(2*H*)-ylidene)malononitrile (3ai)**

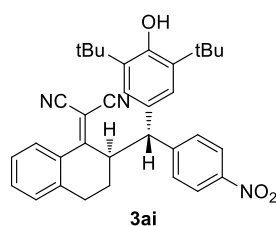

yield 90% (48.0 mg); white solid, m.p. 122-124 °C;  $^1H$  NMR (300 MHz,  $CDCl_3$ )  $\delta$  8.23 (d, *J* = 8.6 Hz, 2H), 7.76-7.48 (m, 4H), 7.40-7.25 (m, 2H), 6.68 (s, 2H), 5.20 (s, 1H), 4.36-4.02 (m, 1H), 3.81 (d, *J* = 11.7 Hz, 1H), 3.06-2.75 (m, 2H), 2.21-1.99 (m, 2H), 1.36 (s, 18H) ppm;  $^{13}C$  NMR (75 MHz,  $CDCl_3$ )  $\delta$  176.0, 153.4, 148.7, 147.1, 139.2, 136.3, 133.8, 130.0, 129.1, 128.9, 128.8, 128.7, 126.9, 124.4, 124.2, 124.1, 113.5, 81.1, 52.4, 46.8, 34.5, 30.1, 25.5, 24.3 ppm;  $[\alpha]_D^{25}$  = -41.0 (*c* = 0.3, EA); the *dr* value was evaluated by HPLC of the mixture and was found to be >20:1; the *er* value was determined by HPLC, using CHIRALCEL OD-H, *i*-PrOH: Hexane = 1:99,  $\nu$  = 0.5 mL/min,  $\lambda$  = 254 nm, *t* (major) = 31.25 min, *t* (minor) = 42.26 min; *er* = 99.5:0.5; HRMS (ESI) calcd for  $[C_{34}H_{35}KN_3O_3]^+$  572.2310, found 572.2296.

**2-((*R*)-2-((*S*)-[1,1'-biphenyl]-4-yl(3,5-di-*tert*-butyl-4-hydroxyphenyl)methyl)-3,4-dihydronaphthalen-1(2*H*)-ylidene)malononitrile (3aj)**

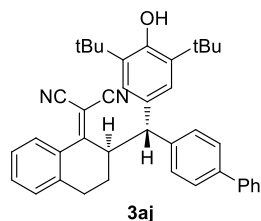

yield 94% (53.0 mg); white solid, m.p. 115-118 °C;  $^1H$  NMR (300 MHz,  $CDCl_3$ )  $\delta$  7.68-7.21 (m, 13H), 6.76 (s, 2H), 5.13 (s, 1H), 4.28-4.01 (m, 1H), 3.72 (d, *J* = 11.7 Hz, 1H), 3.28-2.71 (m, 2H), 2.35-1.90 (m, 2H), 1.40 (s, 18H) ppm;  $^{13}C$  NMR (75 MHz,  $CDCl_3$ )  $\delta$  177.3, 152.9, 140.6, 140.2, 140.0, 139.6, 135.8, 133.4, 131.6, 129.8, 129.3, 128.8, 128.3, 127.7, 127.3, 127.0, 126.5, 124.3, 113.7, 113.5, 80.5, 52.3, 47.4, 34.4, 30.1, 25.6, 24.3 ppm;  $[\alpha]_D^{25}$  = -36.5 (*c* = 0.3, EA); the *dr* value was evaluated by HPLC of the mixture and was found to be >20:1; the *er* value was determined by HPLC, using CHIRALCEL OD-H, *i*-PrOH: Hexane = 1:99,  $\nu$  = 0.5 mL/min,  $\lambda$  = 254 nm, *t* (major) = 19.77 min, *t* (minor) = 24.95 min; *er* = 90:10; HRMS (ESI) calcd for  $[C_{40}H_{40}KN_2O]^+$  603.2772, found 603.2762.

**2-((R)-2-((R)-(3-chlorophenyl)(3,5-di-tert-butyl-4-hydroxyphenyl)methyl)-3,4-dihydronaphthalen-1(2H)-ylidene)malononitrile (3ak)**

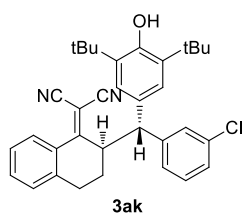

yield 84% (43.9 mg); white solid, m.p. 235-238 °C;  $^1\text{H}$  NMR (300 MHz,  $\text{CDCl}_3$ )  $\delta$  7.64 (d,  $J = 7.9$  Hz, 1H), 7.55-7.52 (m, 1H), 7.43-7.19 (m, 6H), 6.70 (s, 2H), 5.15 (s, 1H), 4.11-4.04 (m, 1H), 3.64 (d,  $J = 11.7$  Hz, 1H), 3.10-2.81 (m, 2H), 2.14-1.97 (m, 2H), 1.36 (s, 18H) ppm;  $^{13}\text{C}$  NMR (75 MHz,  $\text{CDCl}_3$ )  $\delta$  176.6, 153.1, 143.2, 139.4, 136.0, 134.8, 133.5, 130.9, 130.2, 129.9, 129.2, 128.8, 128.6, 127.3, 126.6, 125.5, 124.3, 113.5, 113.4, 80.7, 52.3, 47.1, 34.4, 30.1, 25.4, 24.2 ppm;  $[\alpha]_{\text{D}}^{25} = -32.7$  ( $c = 0.3$ , EA); the dr value was evaluated by HPLC of the mixture and was found to be >20:1; the er value was determined by HPLC, using CHIRALCEL OD-H, *i*-PrOH: Hexane =1:99,  $\nu = 0.5$  mL/min,  $\lambda = 254$  nm,  $t$  (major) = 11.35 min,  $t$  (minor) = 15.75 min; er = 97:3; HRMS (ESI) calcd for  $[\text{C}_{34}\text{H}_{35}\text{ClN}_2\text{NaO}]^+$  545.2330, found 545.2331.

**2-((R)-2-((R)-(3,5-di-tert-butyl-4-hydroxyphenyl)(3-fluorophenyl)methyl)-3,4-dihydronaphthalen-1(2H)-ylidene)malononitrile (3al)**

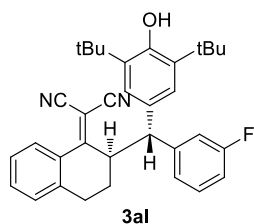

yield 89% (45.0 mg); white solid, m.p. 178-180 °C;  $^1\text{H}$  NMR (300 MHz,  $\text{CDCl}_3$ )  $\delta$  7.63 (d,  $J = 7.8$  Hz, 1H), 7.60-7.52 (m, 1H), 7.39-7.30 (m, 3H), 7.26-7.25 (m, 1H), 7.12 (d,  $J = 10.0$  Hz, 1H), 6.97-6.94 (m, 1H), 6.71 (s, 2H), 5.16 (s, 1H), 4.12-4.06 (m, 1H), 3.67 (d,  $J = 11.7$  Hz, 1H), 3.20-2.65 (m, 2H), 2.21-1.95 (m, 2H), 1.36 (s, 18H) ppm;  $^{13}\text{C}$  NMR (75 MHz,  $\text{CDCl}_3$ )  $\delta$  176.8, 153.0, 143.7, 139.5, 135.9, 133.5, 131.0, 130.6, 130.5, 129.9, 129.2, 128.8, 126.6, 124.3, 123.3, 115.3, 115.0, 114.2, 113.9, 113.4, 52.2, 47.2, 34.4, 30.1, 25.4, 24.2 ppm;  $[\alpha]_{\text{D}}^{25} = -23.7$  ( $c = 0.3$ , EA); the dr value was evaluated by HPLC of the mixture and was found to be >20:1; the er value was determined by HPLC, using CHIRALCEL OD-H, *i*-PrOH: Hexane =1:99,  $\nu = 0.5$  mL/min,  $\lambda = 254$  nm,  $t$  (major) = 11.36 min,  $t$  (minor) = 14.38 min; er = 98:2; HRMS (ESI) calcd for  $[\text{C}_{34}\text{H}_{35}\text{FN}_2\text{NaO}]^+$  529.2626, found 529.2621.

**2-((R)-2-((R)-(3-bromophenyl)(3,5-di-tert-butyl-4-hydroxyphenyl)methyl)-3,4-dihydronaphthalen-1(2H)-ylidene)malononitrile (3am)**

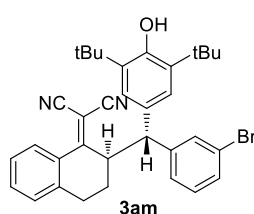

yield 92% (52.2 mg); white solid, m.p. 189-191 °C;  $^1\text{H}$  NMR (300 MHz,  $\text{CDCl}_3$ )  $\delta$  7.64 (d,  $J = 7.7$  Hz, 1H), 7.60-7.53 (m, 1H), 7.47 (m, 1H), 7.37-7.32 (m, 4H), 7.28-7.25 (m, 1H), 6.70 (s, 2H), 5.16 (s, 1H), 4.12-4.06 (m, 1H), 3.63 (d,  $J = 11.7$  Hz, 1H), 3.17-2.80 (m, 2H), 2.12-2.05 (m, 2H), 1.37 (s, 18H) ppm;  $^{13}\text{C}$  NMR (75 MHz,  $\text{CDCl}_3$ )  $\delta$  176.6, 153.1, 143.5, 139.4, 136.0, 131.6, 130.5, 130.2, 129.9, 129.2, 128.8, 128.0, 126.9, 126.6, 125.9, 124.3, 123.1, 113.6, 113.4, 80.7, 52.2, 47.1, 34.4, 30.1, 25.4, 24.2 ppm;  $[\alpha]_{\text{D}}^{25} = -16.0$  ( $c = 0.3$ , EA); the dr value was evaluated by HPLC of the mixture and was found to be >20:1; the er



valure was determined by HPLC, using CHIRALCEL OD-H, *i*-PrOH: Hexane =1:99,  $\nu = 0.5$  mL/min,  $\lambda = 254$  nm,  $t$  (major) = 11.58 min,  $t$  (minor) = 14.66 min; er = 99:1; HRMS (ESI) calcd for  $[C_{34}H_{35}BrN_2NaO]^+$  589.1825, found 589.1818.

**2-((*R*)-2-((*S*)-(3,5-di-*tert*-butyl-4-hydroxyphenyl)(*m*-tolyl)methyl)-3,4-dihydronaphthalen-1(2*H*)-ylidene)malononitrile (3an)**

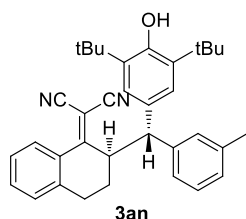

yield 84% (42.2 mg); white solid, m.p. 196-198 °C;  $^1H$  NMR (300 MHz,  $CDCl_3$ )  $\delta$  7.64 (d,  $J = 7.9$  Hz, 1H), 7.59-7.49 (m, 1H), 7.37-7.20 (m, 5H), 7.06 (d,  $J = 6.7$  Hz, 1H), 6.74 (s, 2H), 5.11 (s, 1H), 4.15-4.08 (m, 1H), 3.64 (d,  $J = 11.7$  Hz, 1H), 3.11-2.94 (m, 2H), 2.31 (s, 3H), 2.18-1.94 (m, 2H), 1.36 (s, 18H) ppm;  $^{13}C$  NMR (75 MHz,  $CDCl_3$ )  $\delta$  177.5, 152.8, 141.0, 139.7, 138.6, 135.7, 133.4, 131.8, 129.8, 129.4, 129.1, 128.9, 128.8, 127.9, 126.5, 124.5, 124.3, 113.7, 113.5, 80.4, 52.6, 47.4, 34.4, 30.1, 25.6, 24.3, 21.5 ppm;  $[\alpha]_D^{25} = -40.3$  ( $c = 0.3$ , EA); the dr value was evaluated by HPLC of the mixture and was found to be >20:1; the er valure was determined by HPLC, using CHIRALCEL OD-H, *i*-PrOH: Hexane =1:99,  $\nu = 0.5$  mL/min,  $\lambda = 254$  nm,  $t$  (major) = 9.84 min,  $t$  (minor) = 11.99 min; er = 96:4; HRMS (ESI) calcd for  $[C_{35}H_{38}KN_2O]^+$  541.2616, found 541.2613.

**2-((*R*)-2-((*R*)-(3,5-di-*tert*-butyl-4-hydroxyphenyl)(2-fluorophenyl)methyl)-3,4-dihydronaphthalen-1(2*H*)-ylidene)malononitrile (3ao)**

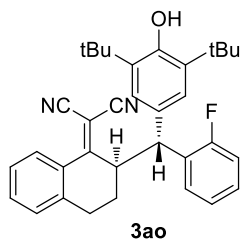

yield 99% (50.1 mg); white solid, m.p. 180°C decomposed;  $^1H$  NMR (300 MHz,  $CDCl_3$ )  $\delta$  7.71-7.50 (m, 3H), 7.35 (t,  $J = 7.4$  Hz, 2H), 7.25-7.17 (m, 2H), 7.06-7.01 (m, 1H), 6.77 (s, 2H), 5.16 (s, 1H), 4.20-4.06 (m, 2H), 3.09-2.85 (m, 2H), 2.08-2.04 (m, 2H), 1.39 (s, 18H) ppm;  $^{13}C$  NMR (75 MHz,  $CDCl_3$ )  $\delta$  177.0, 162.5, 159.2, 153.0, 133.5, 130.5, 129.9, 129.1, 128.8, 128.6, 128.5, 128.4, 128.3, 126.6, 124.7, 124.6, 116.4, 116.0, 113.7, 113.4, 80.7, 46.6, 44.6, 34.3, 30.1, 25.7, 24.3 ppm;  $[\alpha]_D^{25} = -3.0$  ( $c = 0.3$ , EA); the dr value was evaluated by HPLC of the mixture and was found to be >20:1; the er valure was determined by HPLC, using CHIRALCEL OD-H, *i*-PrOH: Hexane =1:99,  $\nu = 0.5$  mL/min,  $\lambda = 254$  nm,  $t$  (major) = 12.04 min,  $t$  (minor) = 15.07 min; er = 60:40; HRMS (ESI) calcd for  $[C_{34}H_{35}FN_2NaO]^+$  529.2626, found 529.2628.

**2-((*R*)-2-((*R*)-1-(3,5-di-*tert*-butyl-4-hydroxyphenyl)ethyl)-3,4-dihydronaphthalen-1(2*H*)-ylidene)malononitrile (3ap)**

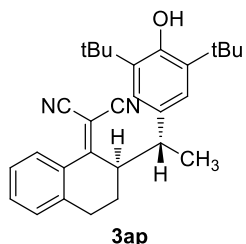

yield 47% (20.0 mg); white solid, m.p. 156-158 °C;  $^1H$  NMR (300 MHz,  $CDCl_3$ )  $\delta$  7.79 (d,  $J = 7.6$  Hz, 1H), 7.38-7.25 (m, 2H), 7.17 (d,  $J = 7.1$  Hz, 1H), 6.75 (s, 2H), 6.41 (s, 1H), 5.18 (s, 1H), 3.85 (q,  $J = 7.0$  Hz, 1H), 2.62-2.39 (m, 1H), 2.31-1.94 (m, 3H), 1.74 (d,  $J = 7.0$  Hz, 3H), 1.30 (s, 18H) ppm;  $^{13}C$  NMR (75 MHz,  $CDCl_3$ )  $\delta$  153.7, 137.7, 135.5, 133.2, 130.2, 128.4, 128.1, 127.7,

127.5, 126.6, 124.8, 123.4, 115.5, 114.4, 48.7, 44.8, 34.2, 30.0, 27.7, 23.1, 17.7 ppm;  $[\alpha]_D^{25} = -1.2$  ( $c = 0.3$ , EA); the dr value was evaluated by HPLC of the mixture and was found to be >20:1; the er value was determined by HPLC, using CHIRALCEL IA, *i*-PrOH: Hexane =5:95,  $v = 0.5$  mL/min,  $\lambda = 254$  nm,  $t$  (major) = 8.59 min,  $t$  (minor) = 8.17 min; er = 53:47; HRMS (ESI) calcd for  $[C_{29}H_{34}KN_2O]^+$  465.2303, found 465.2306.

**2-((*R*)-2-((*R*)-(3,5-di-*tert*-butyl-4-hydroxyphenyl)(3,5-dichlorophenyl)methyl)-3,4-dihydronaphthalen-1(2*H*)-ylidene)malononitrile (3aq)**

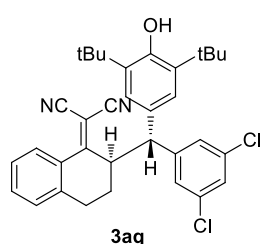

yield 54% (30.1 mg); white solid, m.p. 242-244 °C;  $^1H$  NMR (300 MHz,  $CDCl_3$ )  $\delta$  7.68-7.50 (m, 2H), 7.42-7.22 (m, 5H), 6.67 (s, 2H), 5.20 (s, 1H), 4.04 (d,  $J = 11.7$  Hz, 1H), 3.62 (d,  $J = 11.6$  Hz, 1H), 3.01-2.97 (m, 2H), 2.15-2.09 (m, 2H), 1.37 (s, 18H) ppm;  $^{13}C$  NMR (75 MHz,  $CDCl_3$ )  $\delta$  176.0, 153.3, 144.6, 139.2, 136.2, 135.5, 133.6, 130.1, 129.9, 129.1, 128.8, 127.4, 126.7, 126.4, 124.2, 113.4, 113.3, 80.9, 52.0, 46.8, 34.4, 30.0, 25.4, 24.2 ppm;  $[\alpha]_D^{25} = -51.5$  ( $c = 0.3$ , EA); the dr value was evaluated by HPLC of the mixture and was found to be >20:1; the er value was determined by HPLC, using CHIRALCEL OD-H, *i*-PrOH: Hexane =1:99,  $v = 0.5$  mL/min,  $\lambda = 254$  nm,  $t$  (major) = 10.39 min,  $t$  (minor) = 12.86 min; er = 96:4; HRMS (ESI) calcd for  $[C_{34}H_{34}Cl_2N_2NaO]^+$  579.1940, found 579.1930.

**2-((*R*)-2-((*S*)-(3,5-di-*tert*-butyl-4-hydroxyphenyl)(phenyl)methyl)-7-methoxy-3,4-dihydronaphthalen-1(2*H*)-ylidene)malononitrile (3ba)**

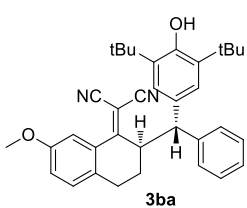

yield 85% (44.0 mg); white solid, m.p. 203-205 °C;  $^1H$  NMR (300 MHz,  $CDCl_3$ )  $\delta$  7.44 (d,  $J = 7.2$  Hz, 2H), 7.36 (t,  $J = 7.5$  Hz, 2H), 7.30-7.16 (m, 3H), 7.15-7.12 (m, 1H), 6.77 (s, 2H), 5.12 (s, 1H), 4.14-4.08 (m, 1H), 3.84 (s, 3H), 3.75 (d,  $J = 11.6$  Hz, 1H), 3.01-2.76 (m, 2H), 2.21-1.87 (m, 2H), 1.37 (s, 18H) ppm;  $^{13}C$  NMR (75 MHz,  $CDCl_3$ )  $\delta$  177.3, 157.7, 152.8, 141.3, 135.8, 131.8, 131.7, 130.9, 129.8, 129.0, 128.0, 127.0, 124.4, 121.6, 113.9, 113.5, 111.7, 80.4, 55.6, 52.6, 47.4, 34.4, 30.1, 26.0, 23.5 ppm;  $[\alpha]_D^{25} = -63.7$  ( $c = 0.3$ , EA); the dr value was evaluated by HPLC of the mixture and was found to be >20:1; the er value was determined by HPLC, using CHIRALCEL OD-H, *i*-PrOH: Hexane =1:99,  $v = 0.5$  mL/min,  $\lambda = 254$  nm,  $t$  (major) = 11.31 min,  $t$  (minor) = 20.83 min; er = 90:10; HRMS (ESI) calcd for  $[C_{35}H_{38}KN_2O_2]^+$  557.2565, found 557.2571.

**2-((R)-7-bromo-2-((S)-(3,5-di-tert-butyl-4-hydroxyphenyl)(phenyl)methyl)-3,4-dihydronaphthalen-1(2H)-ylidene)malononitrile (3ca)**

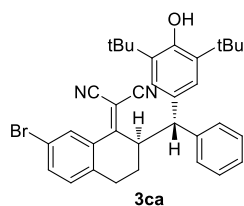

yield 77% (43.7 mg); white solid, m.p. 192-194 °C; <sup>1</sup>H NMR (300 MHz, CDCl<sub>3</sub>) δ 7.76-7.59 (m, 2H), 7.48-7.31 (m, 4H), 7.28-7.21 (m, 2H), 6.74 (s, 2H), 5.15 (s, 1H), 4.17-4.11 (m, 1H), 3.63 (d, *J* = 11.7 Hz, 1H), 3.09-2.73 (m, 2H), 2.22-1.91 (m, 2H), 1.40 (s, 18H) ppm; <sup>13</sup>C NMR (75 MHz, CDCl<sub>3</sub>) δ 175.6, 153.0, 140.9, 138.4, 136.1, 136.0, 131.5, 131.4, 131.1, 129.1, 127.8, 127.2, 124.2, 120.0, 113.1, 113.0, 81.7, 52.6, 47.2, 34.4, 30.1, 25.3, 23.9 ppm; [α]<sub>D</sub><sup>25</sup> = -69.7 (c = 0.3, EA); the dr value was evaluated by HPLC of the mixture and was found to be >20:1; the er value was determined by HPLC, using CHIRALCEL OD-H, *i*-PrOH: Hexane = 1:99, *v* = 0.5 mL/min, λ = 254 nm, *t* (major) = 9.23 min, *t* (minor) = 11.15 min; er = 93:7; HRMS (ESI) calcd for [C<sub>34</sub>H<sub>35</sub>BrN<sub>2</sub>NaO]<sup>+</sup> 589.1825, found 589.1819.

**2-((R)-7-chloro-2-((S)-(3,5-di-tert-butyl-4-hydroxyphenyl)(phenyl)methyl)-3,4-dihydronaphthalen-1(2H)-ylidene)malononitrile (3da)**

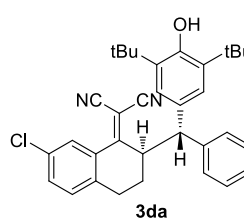

yield 98% (51.3 mg); white solid, m.p. 176-178 °C; <sup>1</sup>H NMR (300 MHz, CDCl<sub>3</sub>) δ 7.59-7.48 (m, 2H), 7.43 (d, *J* = 7.3 Hz, 2H), 7.36 (t, *J* = 7.5 Hz, 2H), 7.31-7.21 (m, 2H), 6.74 (s, 2H), 5.16 (s, 1H), 4.19-4.05 (m, 1H), 3.63 (d, *J* = 11.7 Hz, 1H), 3.10-2.77 (m, 2H), 2.02-1.95 (m, 2H), 1.38 (s, 18H); <sup>13</sup>C NMR (75 MHz, CDCl<sub>3</sub>) δ 175.8, 153.0, 140.9, 137.8, 135.9, 133.2, 132.4, 131.5, 131.2, 130.7, 129.1, 128.2, 127.8, 127.2, 124.2, 113.1, 113.0, 52.6, 47.2, 34.4, 30.1, 25.3, 23.9 ppm; [α]<sub>D</sub><sup>25</sup> = -58.7 (c = 0.3, EA); the dr value was evaluated by HPLC of the mixture and was found to be >20:1; the er value was determined by HPLC, using CHIRALCEL OD-H, *i*-PrOH: Hexane = 1:99, *v* = 0.5 mL/min, λ = 254 nm, *t* (major) = 13.04 min, *t* (minor) = 18.41 min; er = 86:14; HRMS (ESI) calcd for [C<sub>34</sub>H<sub>35</sub>ClKN<sub>2</sub>O]<sup>+</sup> 561.2069, found 561.2056.

**2-((R)-2-((S)-(3,5-di-tert-butyl-4-hydroxyphenyl)(phenyl)methyl)-6-methoxy-3,4-dihydronaphthalen-1(2H)-ylidene)malononitrile (3ea)**

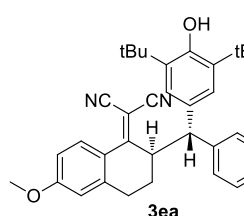

yield 87% (45.1 mg); white solid, m.p. 174-176 °C; <sup>1</sup>H NMR (300 MHz, CDCl<sub>3</sub>) δ 7.72 (d, *J* = 8.8 Hz, 1H), 7.44 (d, *J* = 7.1 Hz, 2H), 7.36 (t, *J* = 7.5 Hz, 2H), 7.29-7.20 (m, 1H), 6.87-6.91 (m, 1H), 6.81 (d, *J* = 2.3 Hz, 1H), 6.75 (s, 2H), 5.12 (s, 1H), 4.08-4.03 (m, 1H), 3.88 (s, 3H), 3.70 (d, *J* = 11.6 Hz, 1H), 3.01-2.96 (m, 1H), 2.86-2.79 (m, 1H), 2.11-1.92 (m, 2H), 1.36 (s, 18H); <sup>13</sup>C NMR (75 MHz, CDCl<sub>3</sub>) δ 176.2, 163.6, 152.8, 142.2, 141.2, 135.7, 131.6, 130.8, 129.0, 128.8, 128.0, 127.0, 124.4, 122.2, 114.4, 114.0, 112.8, 78.0, 55.6, 52.6, 47.2, 34.4, 30.1, 25.4, 24.6 ppm; [α]<sub>D</sub><sup>25</sup> = +14.7 (c = 0.3, EA); the dr value was evaluated by HPLC of the mixture and was found to be >20:1; the er value was

determined by HPLC, using CHIRALCEL OD-H, *i*-PrOH: Hexane =1:99,  $\nu$  = 0.5 mL/min,  $\lambda$  = 254 nm, *t* (major) = 14.72 min, *t* (minor) = 23.78 min; er = 96:4; HRMS (ESI) calcd for  $[\text{C}_{35}\text{H}_{38}\text{KN}_2\text{O}_2]^+$  557.2565, found 557.2560.

**2-((*R*)-6-chloro-2-((*S*)-(3,5-di-*tert*-butyl-4-hydroxyphenyl)(phenyl)methyl)-3,4-dihydronaphthalen-1(2*H*)-ylidene)malononitrile (3fa)**

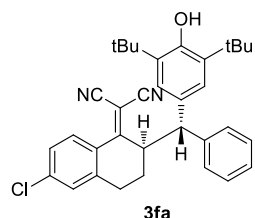

yield 99% (51.8 mg); white solid, m.p. 192-194 °C;  $^1\text{H}$  NMR (300 MHz,  $\text{CDCl}_3$ )  $\delta$  7.63-7.57 (m, 1H), 7.46-7.26 (m, 7H), 6.74 (s, 2H), 5.14 (s, 1H), 4.17-4.10 (m, 1H), 3.64 (d,  $J$  = 11.7 Hz, 1H), 3.14-2.75 (m, 2H), 2.18-1.85 (m, 2H), 1.36 (s, 18H) ppm;  $^{13}\text{C}$  NMR (75 MHz,  $\text{CDCl}_3$ )  $\delta$  175.8, 152.9, 141.5, 140.9, 139.6, 135.9, 131.5, 130.0, 129.9, 129.1, 128.7, 127.9, 127.8, 127.2, 127.0, 124.2, 113.4, 113.2, 52.6, 47.2, 34.4, 30.1, 25.3, 24.3 ppm;  $[\alpha]_{\text{D}}^{25}$  = -30.3 ( $c$  = 0.3, EA); the dr value was evaluated by HPLC of the mixture and was found to be >20:1; the er value was determined by HPLC, using CHIRALCEL OD-H, *i*-PrOH: Hexane =1:99,  $\nu$  = 0.5 mL/min,  $\lambda$  = 254 nm, *t* (major) = 10.85 min, *t* (minor) = 13.42 min; er = 93:7; HRMS (ESI) calcd for  $[\text{C}_{34}\text{H}_{35}\text{ClN}_2\text{NaO}]^+$  545.2330, found 545.2328.

**2-((*R*)-7-bromo-2-((*S*)-(4-bromophenyl)(3,5-di-*tert*-butyl-4-hydroxyphenyl)methyl)-3,4-dihydronaphthalen-1(2*H*)-ylidene)malononitrile (3ga)**

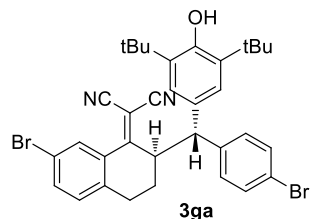

yield 90% (58.1 mg); white solid, m.p. 202-204 °C;  $^1\text{H}$  NMR (300 MHz,  $\text{CDCl}_3$ )  $\delta$  7.73-7.63 (m, 2H), 7.49 (d,  $J$  = 8.4 Hz, 2H), 7.36-7.18 (m, 4H), 6.69 (s, 2H), 5.18 (s, 1H), 4.13-4.09 (m, 1H), 3.60 (d,  $J$  = 11.7 Hz, 1H), 2.93-2.89 (m, 2H), 2.17-1.97 (m, 2H), 1.38 (s, 18H) ppm;  $^{13}\text{C}$  NMR (75 MHz,  $\text{CDCl}_3$ )  $\delta$  175.0, 153.1, 140.0, 138.1, 136.2, 132.2, 131.4, 131.1, 130.9, 130.8, 129.5, 124.0, 121.1, 120.1, 113.0, 112.8, 81.9, 52.0, 46.9, 34.4, 30.0, 25.2, 23.9 ppm;  $[\alpha]_{\text{D}}^{25}$  = -46.3 ( $c$  = 0.3, EA); the dr value was evaluated by HPLC of the mixture and was found to be >20:1; the er value was determined by HPLC, using CHIRALCEL OD-H, *i*-PrOH: Hexane =1:99,  $\nu$  = 0.5 mL/min,  $\lambda$  = 254 nm, *t* (major) = 9.50 min, *t* (minor) = 15.77 min; er = 87:13; HRMS (ESI) calcd for  $[\text{C}_{34}\text{H}_{34}\text{Br}_2\text{N}_2\text{NaO}]^+$  667.0930, found 667.0919.

**2-((R)-2-((S)-(4-bromophenyl)(3,5-di-tert-butyl-4-hydroxyphenyl)methyl)-7-methoxy-3,4-dihydronaphthalen-1(2H)-ylidene)malononitrile (3ha)**

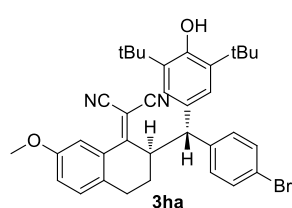

yield 99% (59.1 mg); white solid, m.p. 174-176 °C;  $^1\text{H}$  NMR (300 MHz,  $\text{CDCl}_3$ )  $\delta$  7.49 (d,  $J = 8.4$  Hz, 2H), 7.34 (d,  $J = 8.4$  Hz, 2H), 7.17-7.03 (m, 3H), 6.72 (s, 2H), 5.15 (s, 1H), 4.15-3.96 (m, 1H), 3.81 (s, 3H), 3.72 (d,  $J = 11.7$  Hz, 1H), 3.00-2.70 (m, 2H), 2.12-1.98 (m, 2H), 1.29 (s, 18H) ppm;  $^{13}\text{C}$  NMR (75 MHz,  $\text{CDCl}_3$ )  $\delta$  176.7, 157.8, 153.0, 140.3, 135.9, 132.1, 131.5, 131.1, 130.9, 129.6, 124.3, 121.7, 120.9, 113.8, 113.5, 111.7, 80.6, 55.6, 52.0, 47.2, 34.4, 30.1, 25.9, 23.5 ppm;  $[\alpha]_{\text{D}}^{25} = -43.7$  ( $c = 0.3$ , EA); the dr value was evaluated by HPLC of the mixture and was found to be >20:1; the er value was determined by HPLC, using CHIRALCEL OD-H,  $i$ -PrOH: Hexane =1:99,  $v = 0.5$  mL/min,  $\lambda = 254$  nm,  $t$  (major) = 11.96 min,  $t$  (minor) = 25.84 min; er = 93:7; HRMS (ESI) calcd for  $[\text{C}_{35}\text{H}_{37}\text{BrKN}_2\text{O}_2]^+$  635.1670, found 635.1659.

**2-((R)-2-((S)-(3,5-di-tert-butyl-4-hydroxyphenyl)(phenyl)methyl)cyclohexylidene)malononitrile (3ia)**

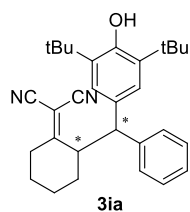

yield 99% (43.6 mg); white solid, m.p. 187-189 °C;  $^1\text{H}$  NMR (300 MHz,  $\text{CDCl}_3$ )  $\delta$  7.46-7.12 (m, 5H), 7.03 (s, 2H), 5.11 (s, 1H), 4.21-4.17 (m, 1H), 3.97-3.76 (m, 1H), 2.86-2.82 (m, 1H), 2.63-2.52 (m, 1H), 2.19-2.15 (m, 1H), 1.89-1.79 (m, 2H), 1.56-1.41 (m, 3H), 1.37 (s, 18H) ppm;  $^{13}\text{C}$  NMR (75 MHz,  $\text{CDCl}_3$ )  $\delta$  187.2, 152.9, 141.4, 136.2, 131.3, 129.1, 128.0, 127.0, 124.0, 112.1, 111.6, 83.9, 52.9, 48.3, 34.4, 31.4, 30.6, 30.2, 28.9, 19.6 ppm;  $[\alpha]_{\text{D}}^{25} = -58.3$  ( $c = 0.3$ , EA); the dr value was evaluated by HPLC of the mixture and was found to be >20:1; the er value was determined by HPLC, using CHIRALCEL OD-H,  $i$ -PrOH: Hexane =1:99,  $v = 0.5$  mL/min,  $\lambda = 254$  nm,  $t$  (major) = 8.58 min,  $t$  (minor) = 8.21 min; er = 56:44; HRMS (ESI) calcd for  $[\text{C}_{30}\text{H}_{36}\text{N}_2\text{NaO}]^+$  463.2720, found 463.2718.

**2-((R)-6-((S)-(3,5-di-tert-butyl-4-hydroxyphenyl)(phenyl)methyl)-6,7,8,9-tetrahydro-5H-benzo[7]jannulen-5-ylidene)malononitrile (3ja)**

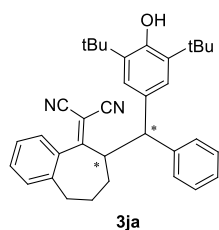

yield 75% (37.7 mg); white solid, m.p. 190-192 °C;  $^1\text{H}$  NMR (300 MHz, DMSO)  $\delta$  7.49-7.04 (m, 9H), 6.82 (s, 2H), 5.75 (d,  $J = 7.2$  Hz, 1H), 4.15 (d,  $J = 11.8$  Hz, 1H), 3.67 (d,  $J = 12.0$  Hz, 1H), 2.83 (s, 2H), 2.08-1.68 (m, 4H), 1.42 (s, 18H) ppm;  $^{13}\text{C}$  NMR (75 MHz,  $\text{CDCl}_3$ )  $\delta$  187.3, 152.8, 142.2, 138.5, 136.0, 134.4, 131.5, 130.8, 129.8, 129.6, 129.0, 127.6, 126.9, 125.9, 124.8, 112.4, 112.0, 87.1, 52.0, 48.8, 36.2, 34.4, 33.9, 30.4, 21.8 ppm;  $[\alpha]_{\text{D}}^{25} = +157.7$  ( $c = 0.3$ , EA); the dr value was evaluated by HPLC of the mixture and was found to be >20:1; the er value was determined by HPLC, using CHIRALCEL OD-H,  $i$ -PrOH: Hexane =1:99,  $v = 0.5$  mL/min,  $\lambda = 254$  nm,  $t$  (major) = 19.30 min,  $t$  (minor) = 18.46 min; er = 91:9; HRMS (ESI) calcd for  $[\text{C}_{35}\text{H}_{38}\text{KN}_2\text{O}]^+$  541.2616, found 541.2620.

**2-((R)-3-((S)-(3,5-di-tert-butyl-4-hydroxyphenyl)(phenyl)methyl)thiochroman-4-ylidene)malononitrile (3ka)**

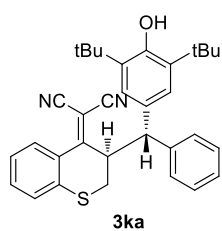

yield 98% (49.6 mg); yellow solid, m.p. 248-250 °C; <sup>1</sup>H NMR (300 MHz, CDCl<sub>3</sub>) δ 7.52 (d, *J* = 7.4 Hz, 2H), 7.43 (d, *J* = 8.0 Hz, 1H), 7.37 (t, *J* = 7.4 Hz, 2H), 7.31-7.25 (m, 3H), 7.13 (d, *J* = 7.3 Hz, 1H), 6.77 (s, 2H), 5.14 (s, 1H), 4.29-4.24 (m, 1H), 4.03 (d, *J* = 11.4 Hz, 1H), 3.41-3.36 (m, 1H), 3.00-2.94 (m, 1H), 1.36 (s, 18H) ppm; <sup>13</sup>C NMR (75 MHz, CDCl<sub>3</sub>) δ 173.7, 153.0, 140.7, 137.7, 135.8, 133.4, 130.8, 130.7, 129.1, 127.9, 127.4, 126.8, 126.0, 124.6, 124.3, 113.1, 113.0, 82.8, 51.6, 43.9, 34.3, 30.1, 29.2 ppm; [α]<sub>D</sub><sup>25</sup> = +74.3 (c = 0.3, EA); the dr value was evaluated by HPLC of the mixture and was found to be >20:1; the er value was determined by HPLC, using CHIRALCEL IB, *i*-PrOH: Hexane = 0.5:99.5, *v* = 0.5 mL/min, λ = 254 nm, *t* (major) = 11.69 min, *t* (minor) = 17.41 min; er = 99:1; HRMS (ESI) calcd for [C<sub>33</sub>H<sub>34</sub>N<sub>2</sub>NaOS]<sup>+</sup> 529.2284, found 529.2279.

**(R)-ethyl 4,4-dicyano-2-((S)-(3,5-di-tert-butyl-4-hydroxyphenyl)(phenyl)methyl)-3-phenylbut-3-enoate (3la)**

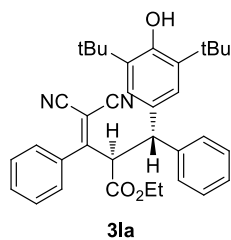

yield 56% (30 mg); white solid, m.p. 148-150 °C; <sup>1</sup>H NMR (300 MHz, CDCl<sub>3</sub>) δ 7.50-7.45 (m, 1H), 7.39-7.26 (m, 6H), 7.19 (d, *J* = 7.1 Hz, 1H), 6.97 (d, *J* = 7.3 Hz, 2H), 6.70 (s, 2H), 5.14-5.08 (m, 2H), 4.25 (d, *J* = 12.2 Hz, 1H), 4.14 (q, *J* = 7.0 Hz, 2H), 1.36 (s, 18H), 1.15 (t, *J* = 7.1 Hz, 3H) ppm; <sup>13</sup>C NMR (75 MHz, CDCl<sub>3</sub>) δ 174.6, 168.1, 152.9, 141.8, 136.2, 133.5, 131.4, 130.0, 128.8, 128.5, 127.9, 127.4, 127.0, 124.6, 124.2, 112.4, 112.2, 62.5, 57.4, 51.6, 34.3, 30.2, 13.9 ppm; [α]<sub>D</sub><sup>25</sup> = +3.7 (c = 0.3, EA); the dr value was evaluated by HPLC of the mixture and was found to be >20:1; the er value was determined by HPLC, using CHIRALCEL IB, *i*-PrOH: Hexane = 0.5:99.5, *v* = 0.5 mL/min, λ = 254 nm, *t* (major) = 10.95 min, *t* (minor) = 10.59 min; er = 67:33; HRMS (ESI) calcd for [C<sub>35</sub>H<sub>38</sub>N<sub>2</sub>NaO<sub>3</sub>]<sup>+</sup> 557.2775, found 557.2777.

## 5. Removal or functionalization of the tert-butyl groups and dicyanoolefin

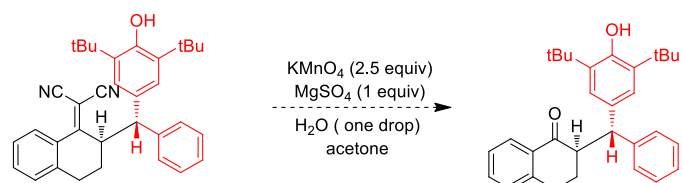

the product was not observed

reference: *Chem. Commun.*, **2009**, 6994

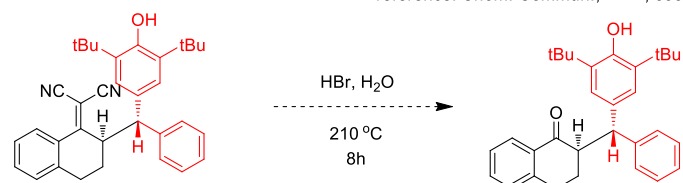

the product was not observed

reference: *Eur. J. Org. Chem.* **2015**, 4119

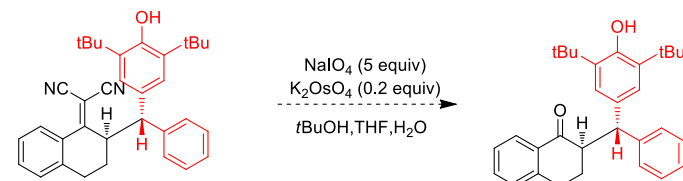

the product was not observed

reference: *Chem. Commun.*, **2015**, 51, 1070

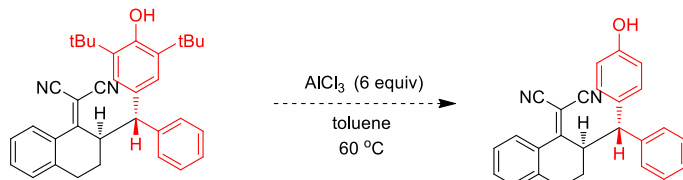

the product was not observed

reference: *J. Am. Chem. Soc.* **2014**, 136, 15929  
*Angew. Chem., Int. Ed.* **2015**, 54, 12134

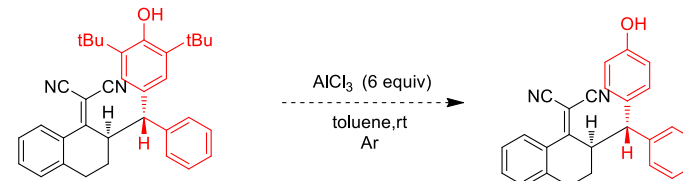

the product was not observed

reference: *Angew. Chem., Int. Ed.* **2015**, 54, 1-6  
 DOI:10.1002/anie.201509110

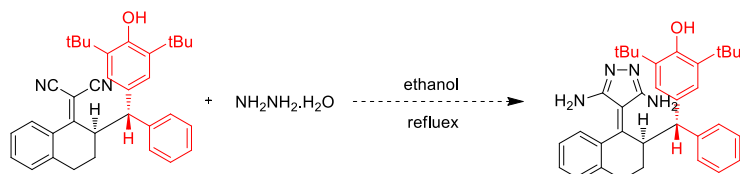

the product was not observed

reference: *Adv. Synth. Catal.* **2012**, 354, 2965

## 6. References

- (1) D. Xue, Y.-C. Chen, X. Cui, Q.-W. Wang, J. Zhu, and J.-G. Deng, *J. Org. Chem.*, **2015**, *70*, 3584.
- (2) (a) W.-D. Chu, L.-F. Zhang, X. Bao, X.-H. Zhao, C. Zeng, J.-Y. Du, G.-B. Zhang, F.-X. Wang, X. -Y. Ma, C.-A. Fan, *Angew. Chem., Int. Ed.*, **2013**, *52*, 9229. (b) L. Caruana, F. Kniep, T. K.Johansen, P. H. Poulsen, K. A. Jørgensen, *J. Am. Chem. Soc.*, **2014**, *136*, 15929. (c) D. Richter, N.Hampel, T. Singer, A. R. Ofial, H. Mayr, *Eur. J. Org. Chem.*, **2009**, *19*, 3203.



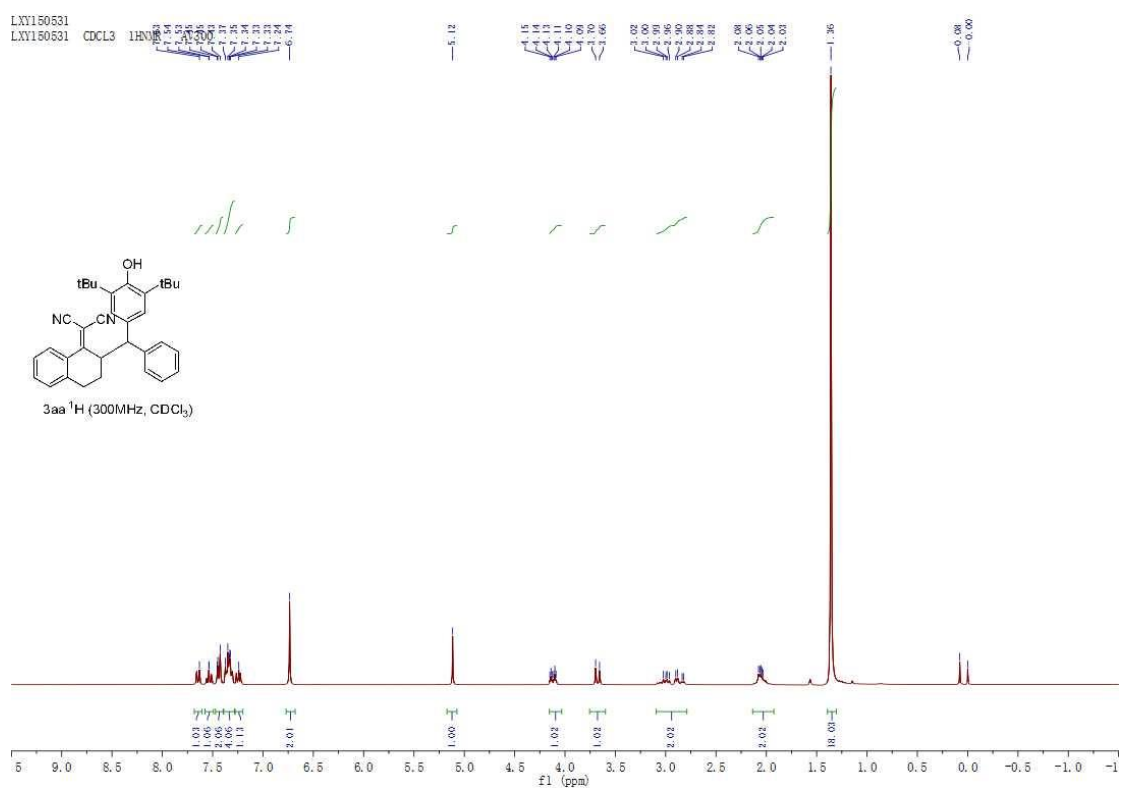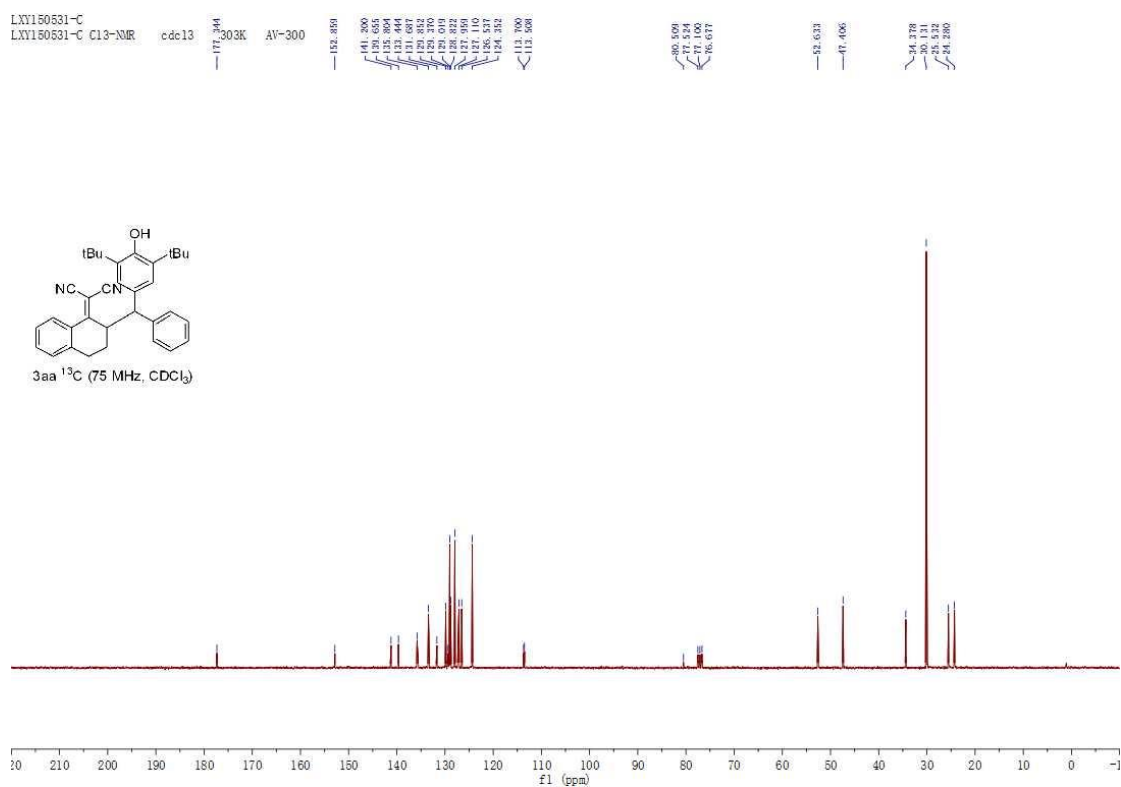

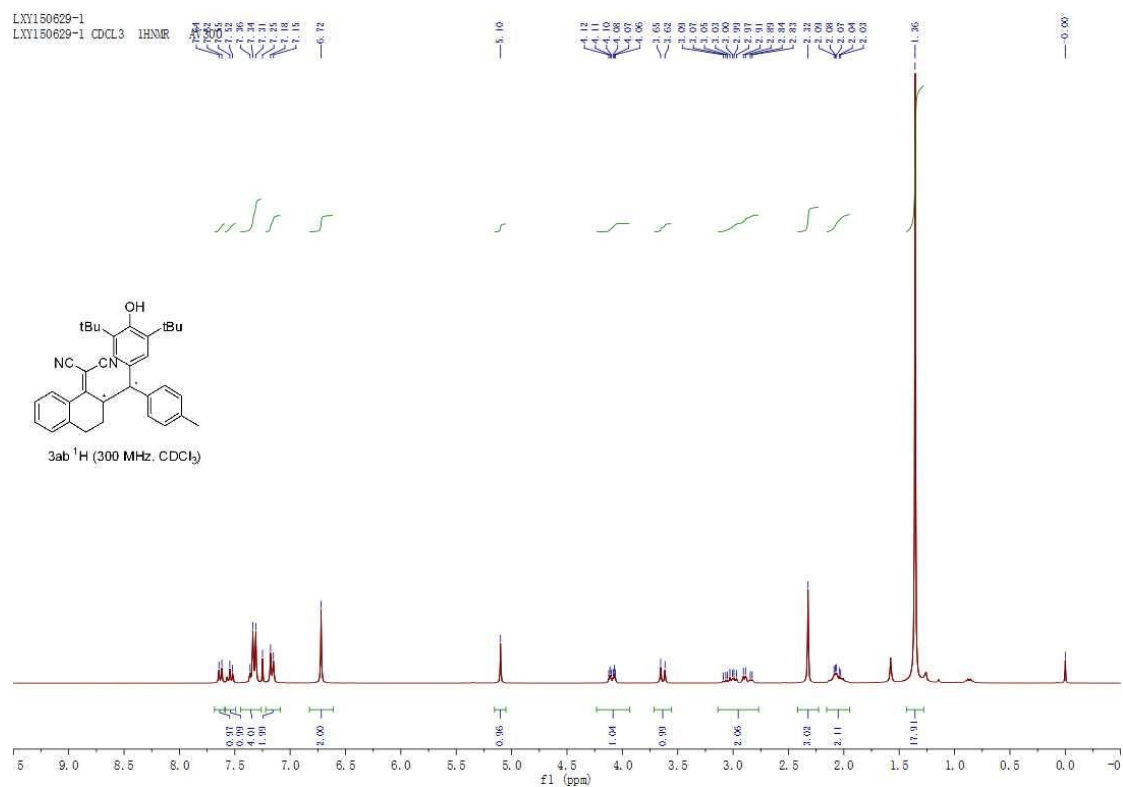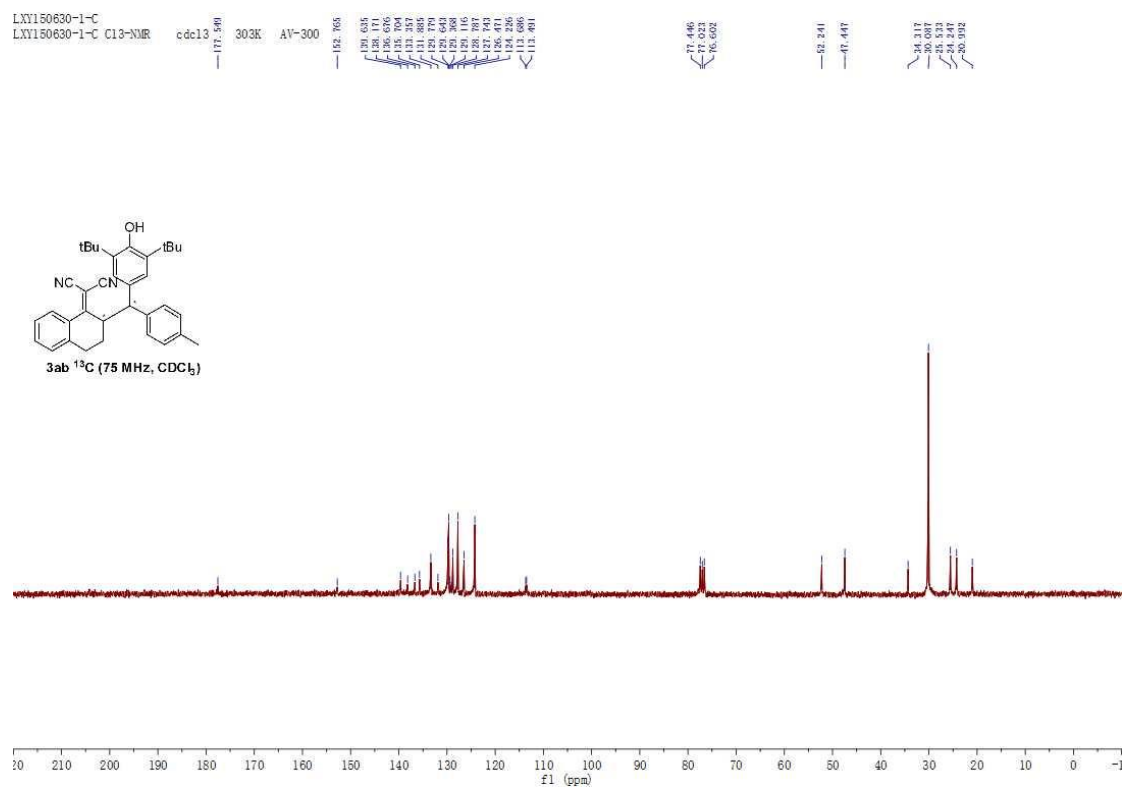







LXY20150612  
LXY20150612 CDCl<sub>3</sub> 1H NMR

3a <sup>1</sup>H (300 MHz, CDCl<sub>3</sub>)

Chemical structure of 3a: CC(C)(C)c1cc(O)c(C(C)(C)C)c1C2=C(C#N)C3=CC=CC=C3CC2c4ccc(C(F)(F)F)cc4

Integration values (from left to right): 2.90, 2.80, 1.98, 1.00, 1.12, 1.01, 2.28, 2.14, 18.15.

[illegible]



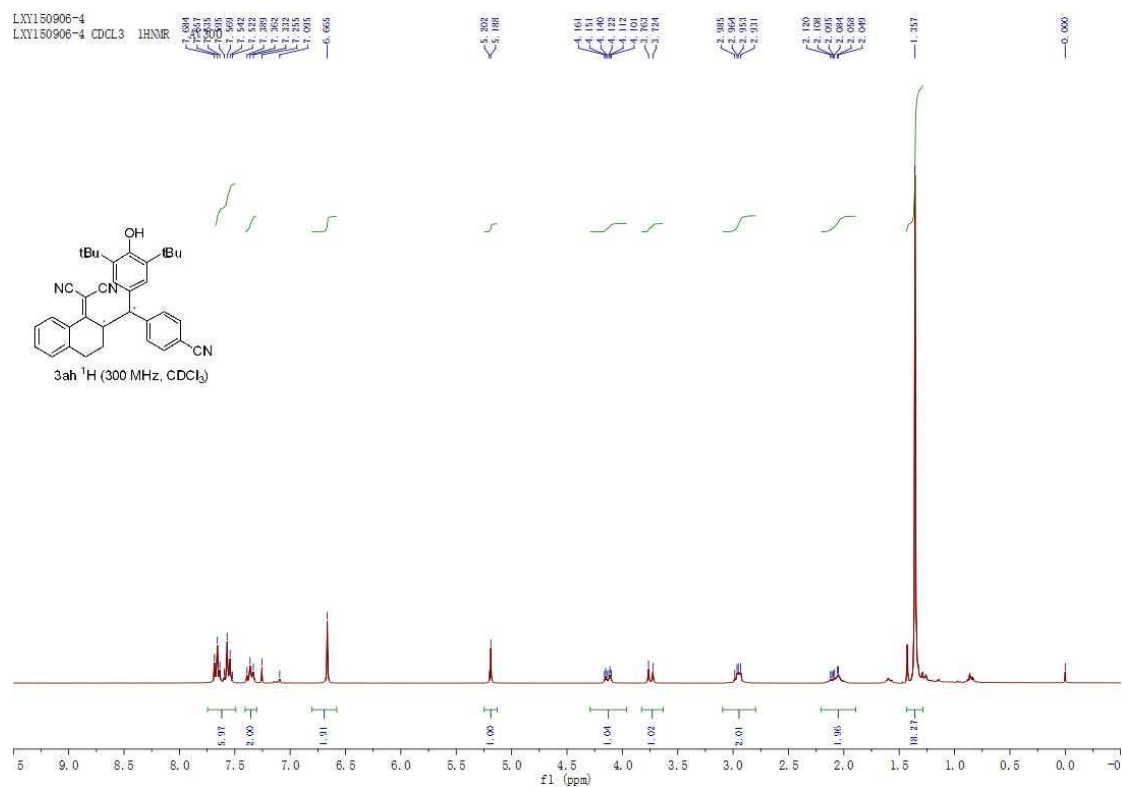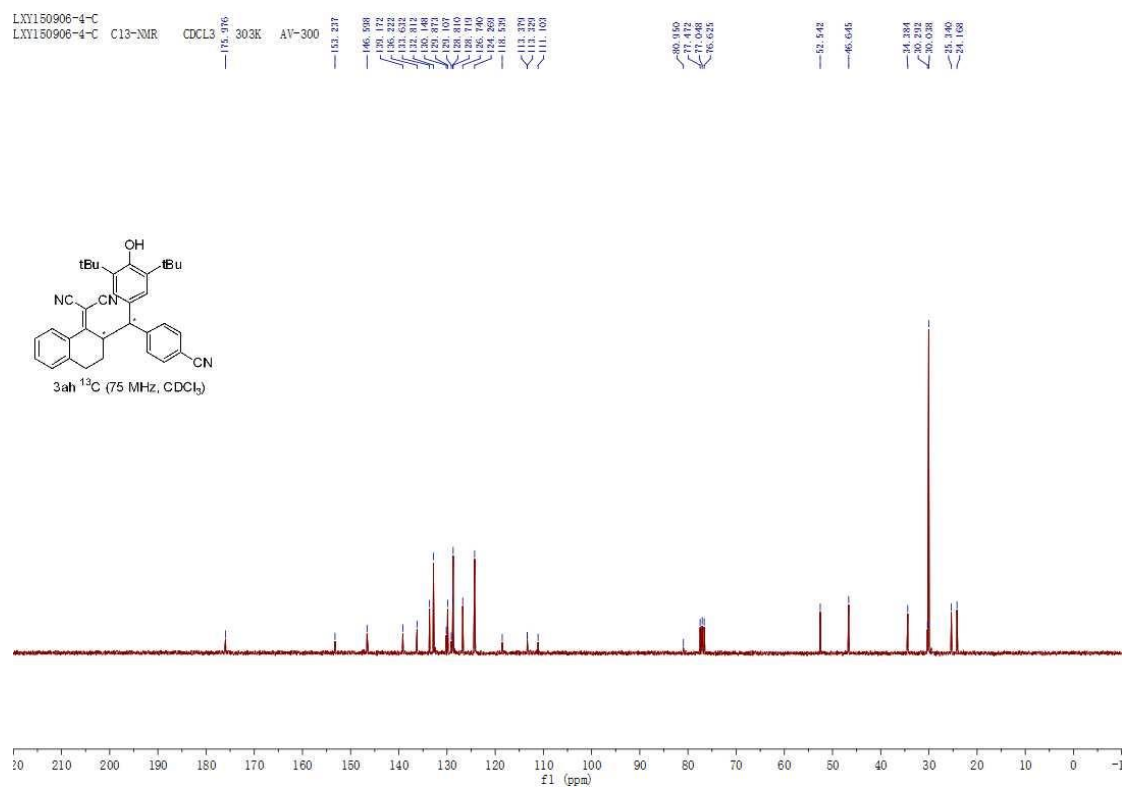



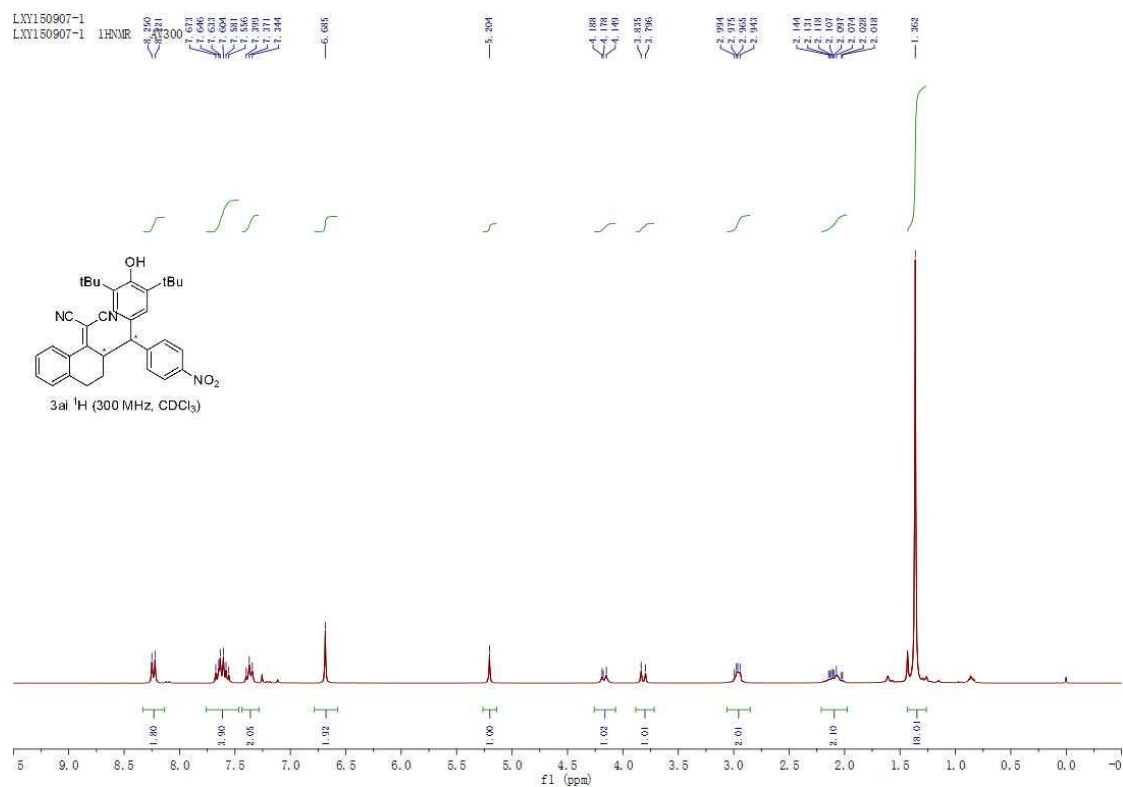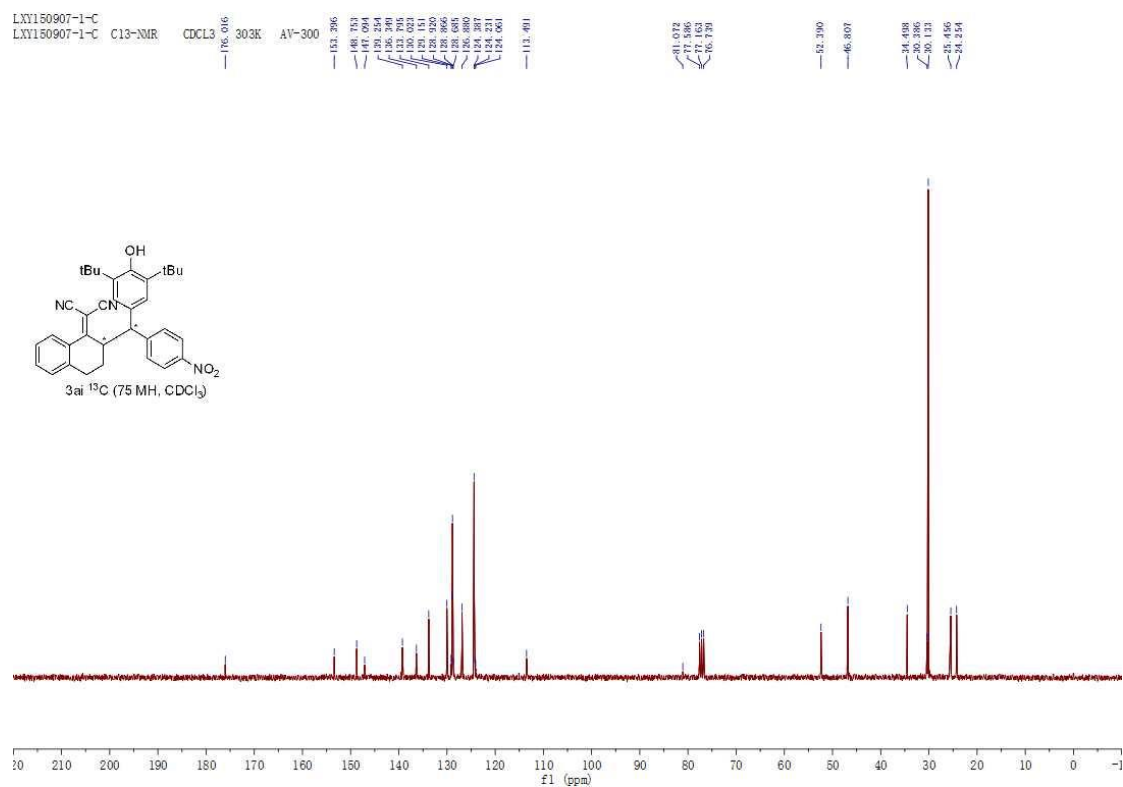





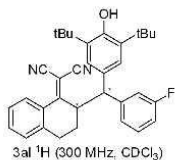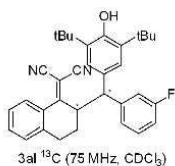

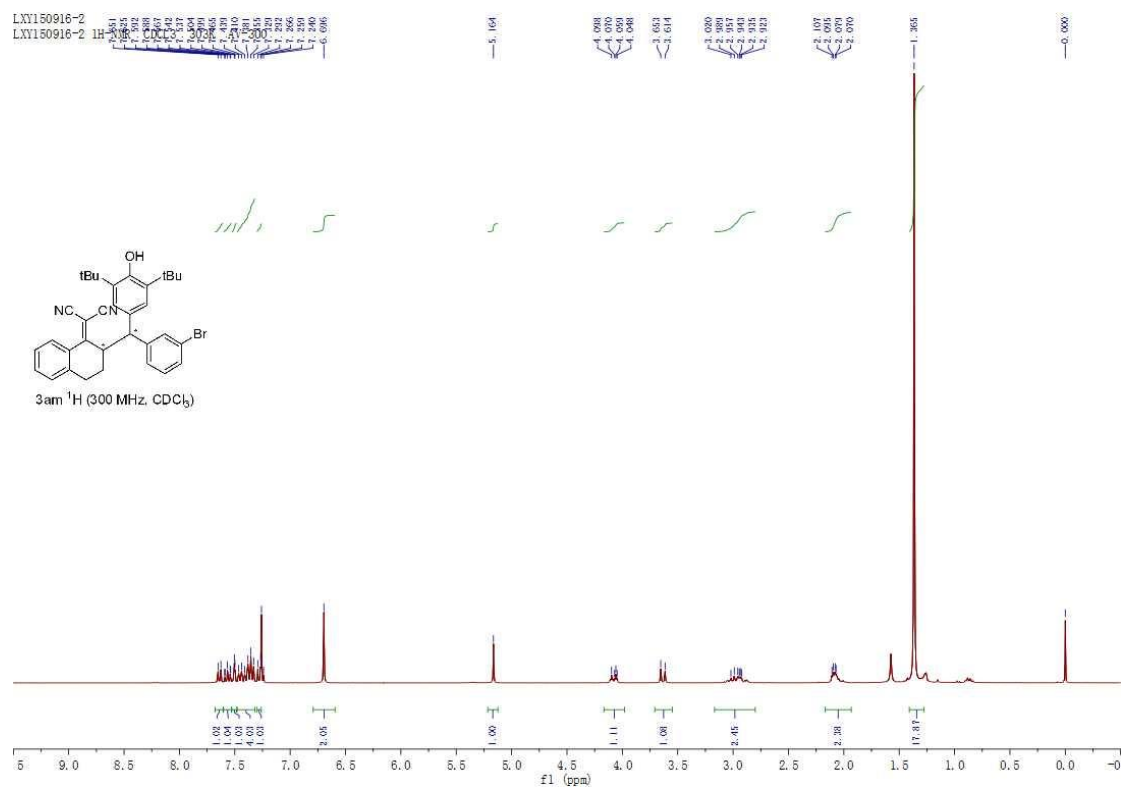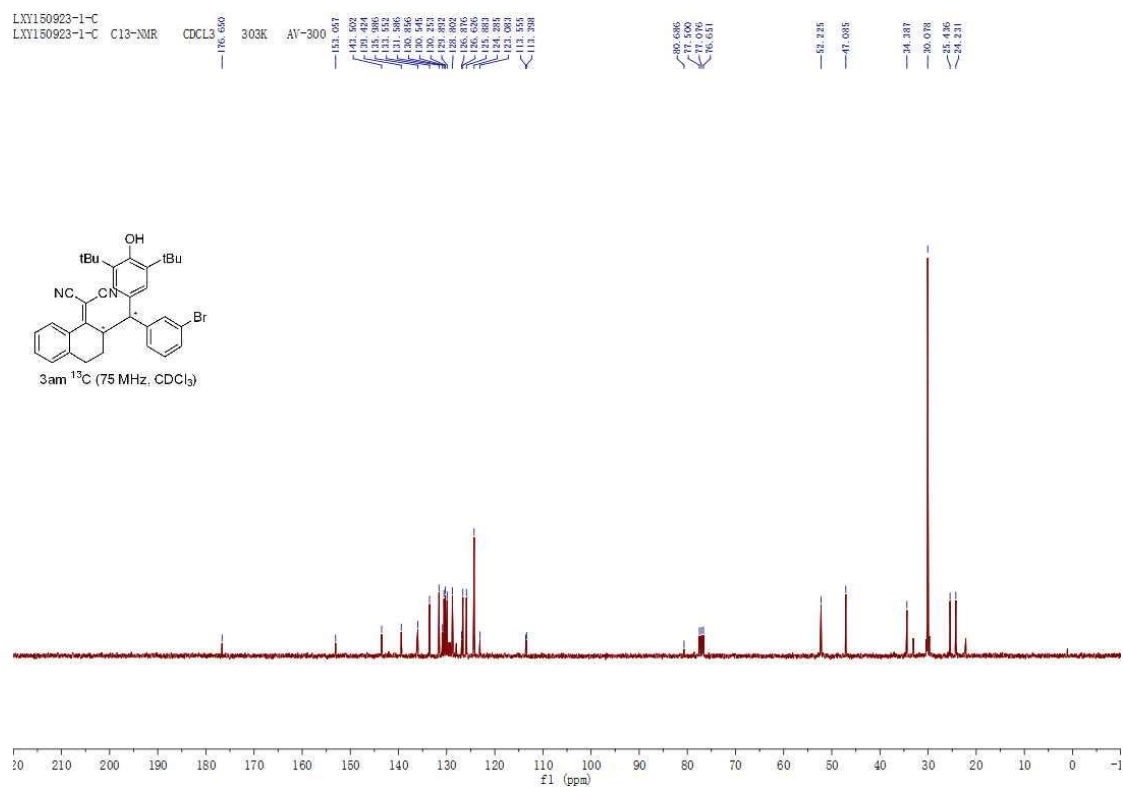

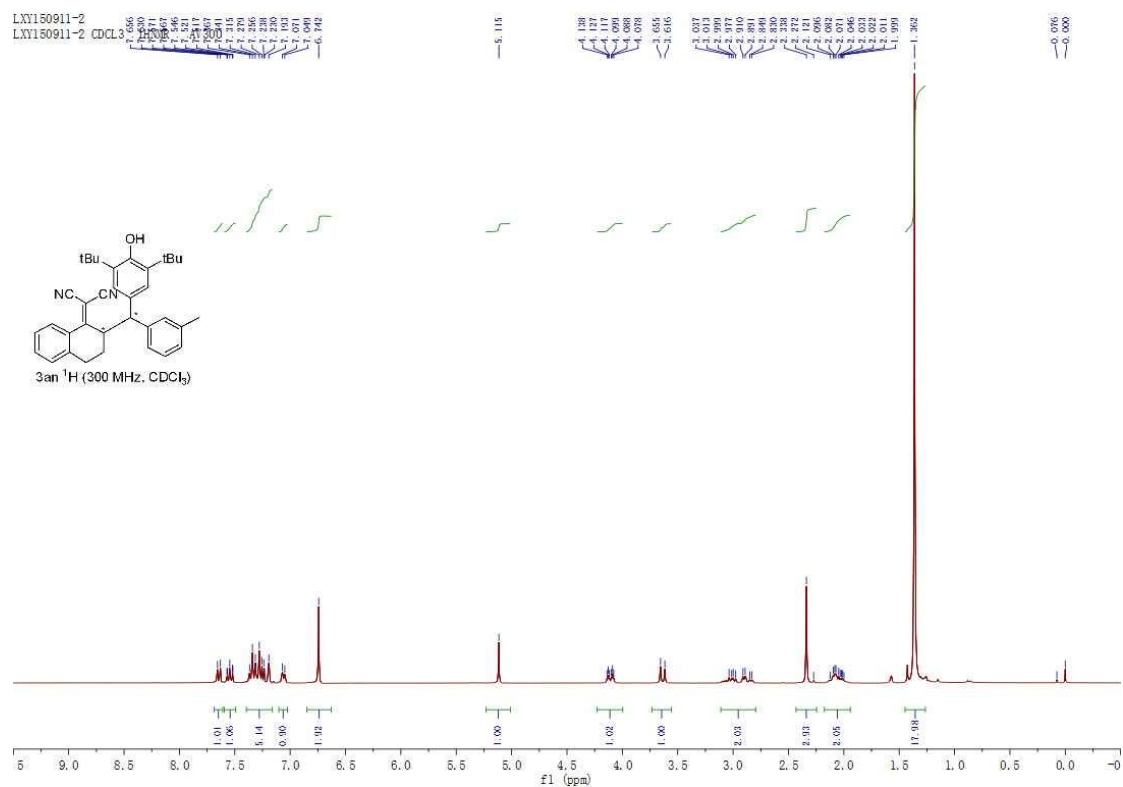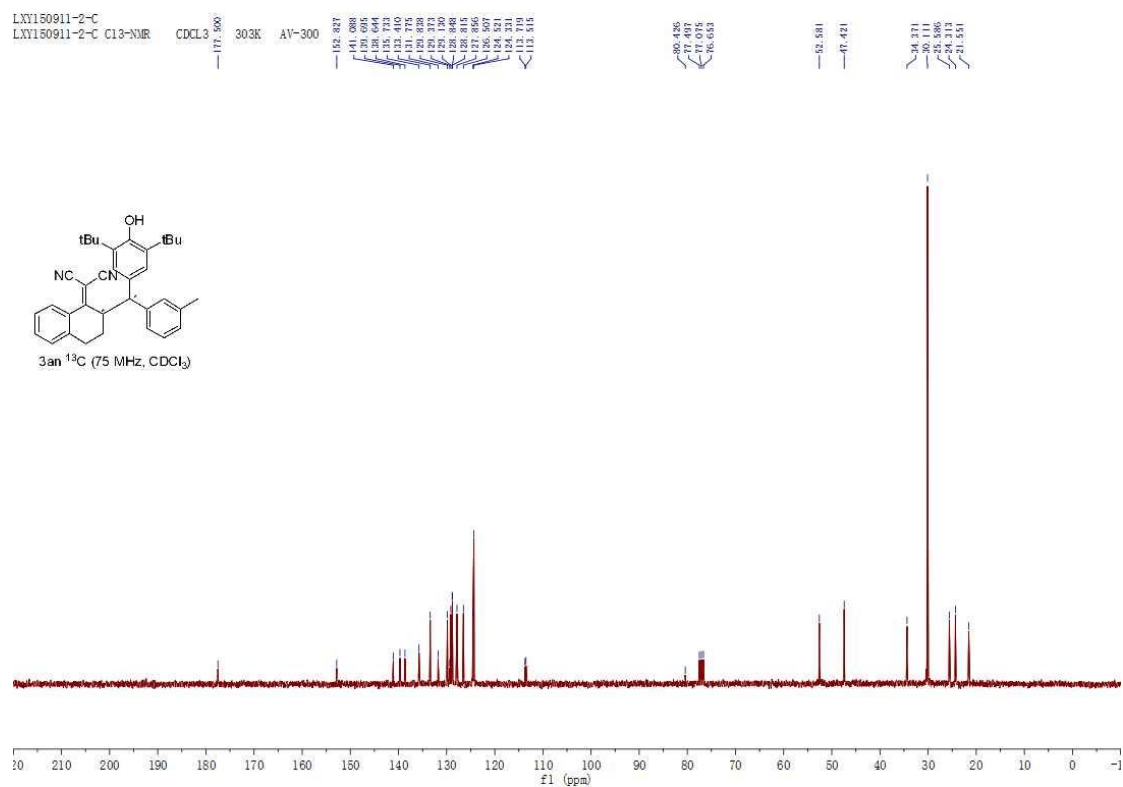



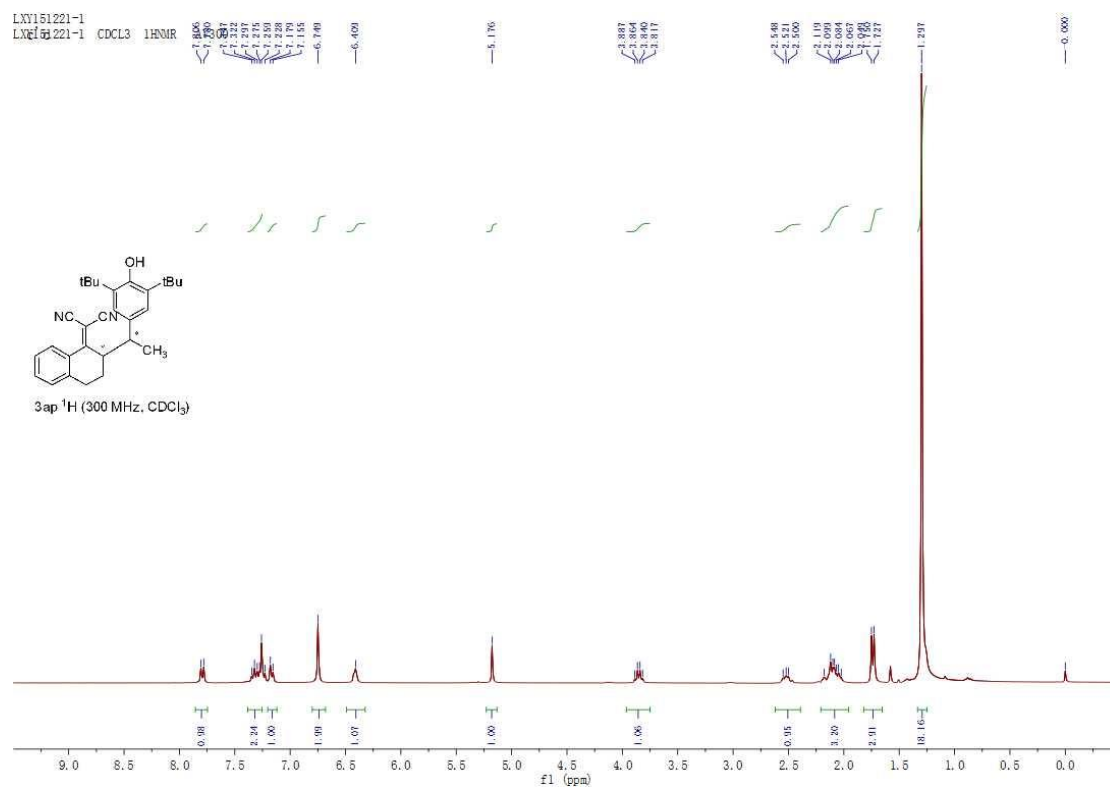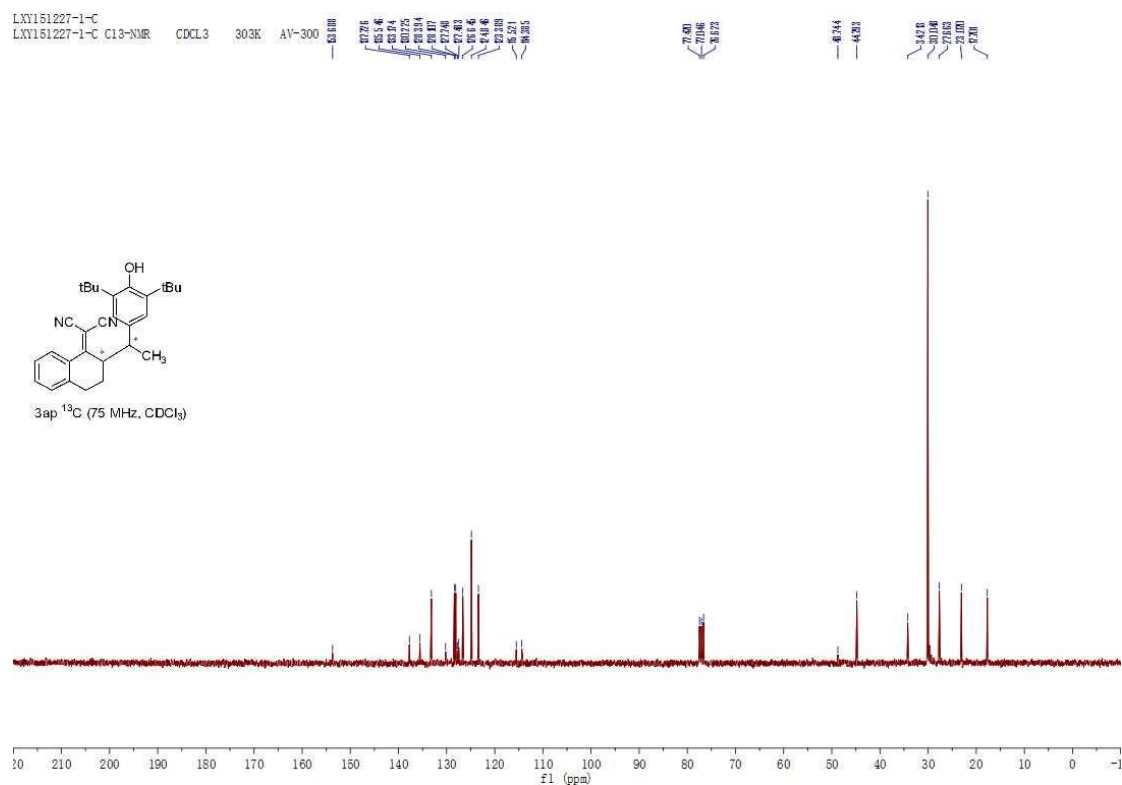



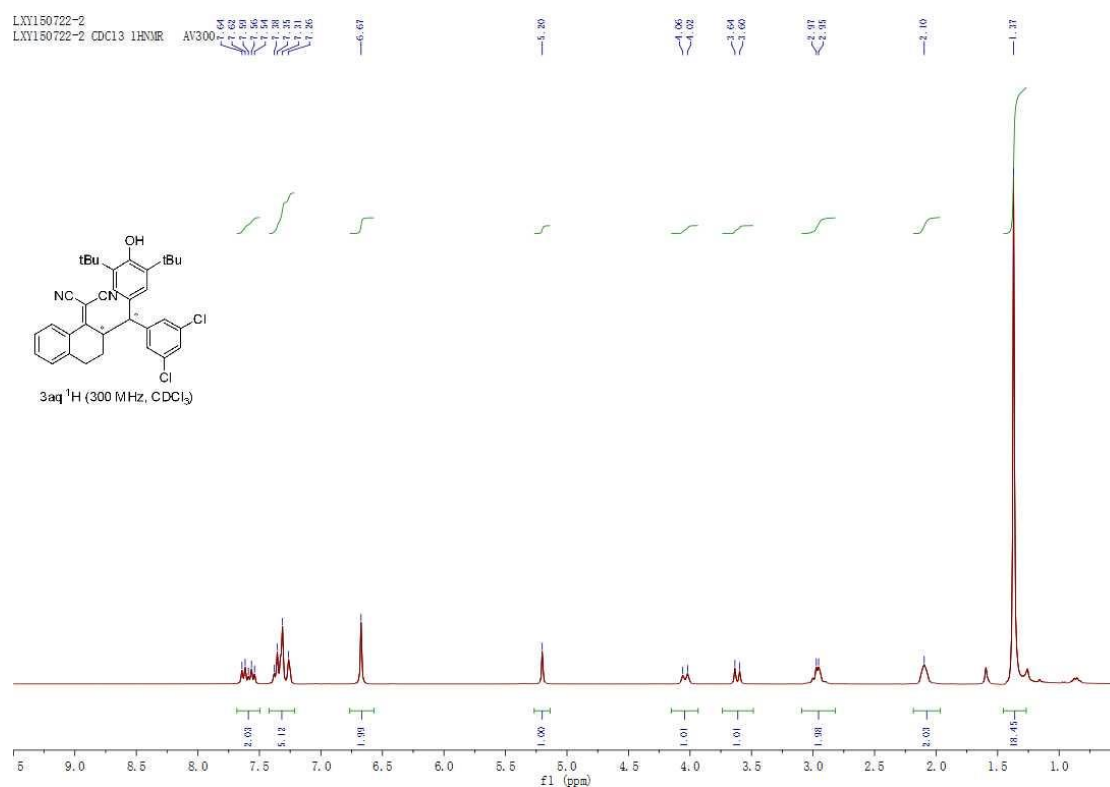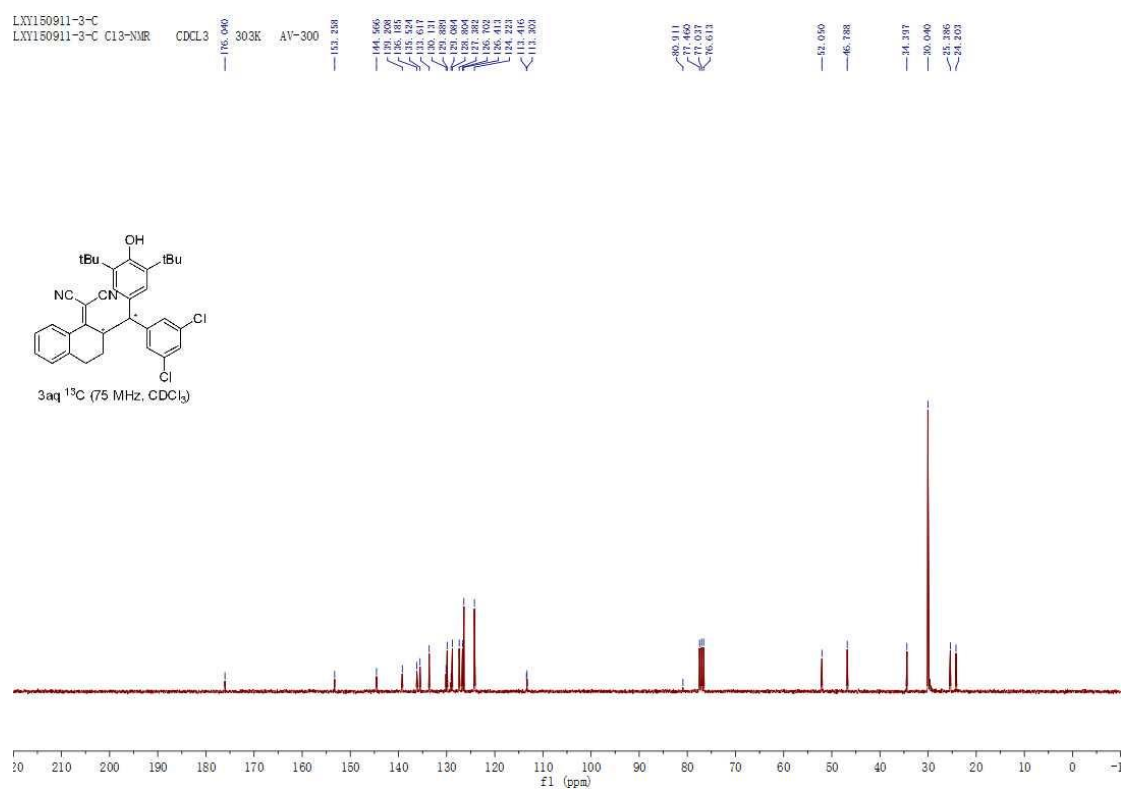



LXY130815-1  
LXY130815-1 CDCl<sub>3</sub> 1H NMR

CC(C)(C)c1cc(O)c(C(C#N)C2=C(C#N)C(=C(C2)C3=CC=CC=C3C4=CC=CC=C4Br)C5=CC=CC=C5)c1

3ca <sup>1</sup>H (300MHz, CDCl<sub>3</sub>)

CC(C)(C)c1cc(O)c(C#N)c(C#N)c1C2=C(C#N)C(=C3C=CC(=C(C=C3)Br)CC2)c4ccccc4  
 LX1150924-3-C  
 LX150924-3-C  
 C13-NMR  
 CDCl3  
 303K  
 AV-300  
 175.804  
 152.988  
 140.872  
 138.354  
 136.585  
 135.985  
 131.463  
 130.527  
 129.087  
 128.522  
 127.252  
 124.184  
 120.011  
 112.066  
 112.390  
 77.669  
 77.511  
 77.007  
 76.864  
 52.643  
 47.204  
 34.287  
 30.698  
 25.301  
 23.351

3ca <sup>13</sup>C (75 MHz, CDCl<sub>3</sub>)

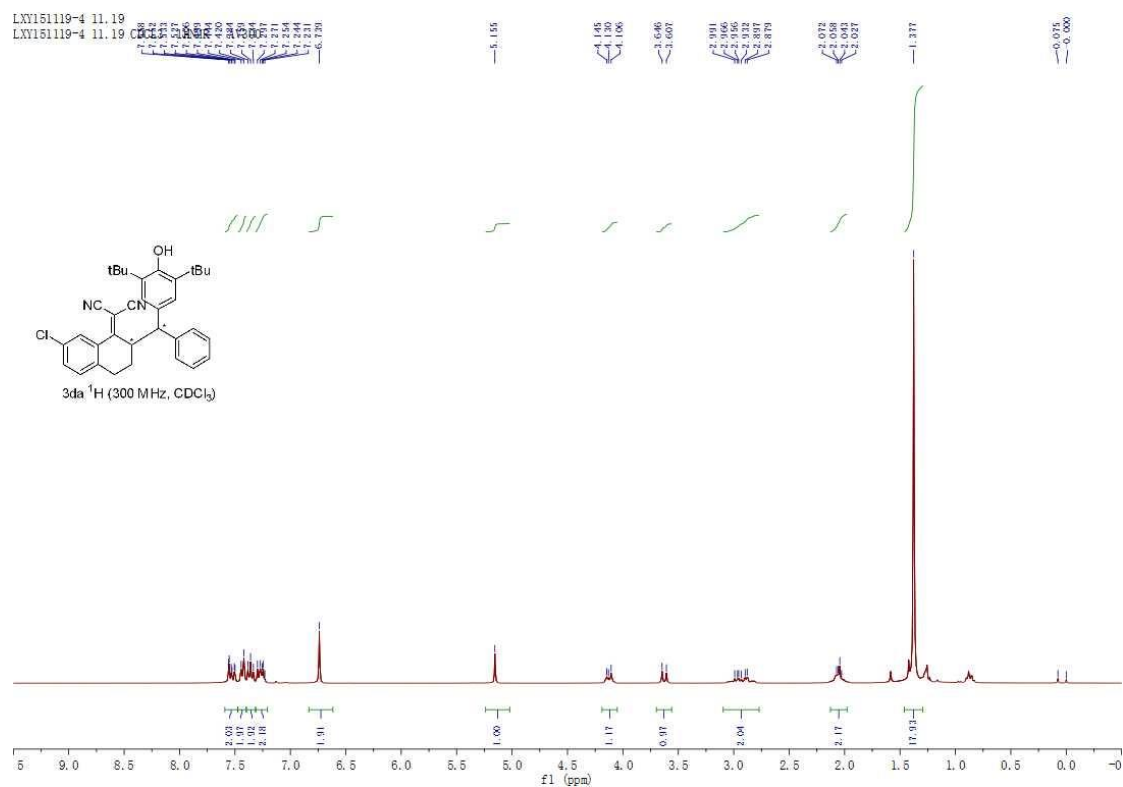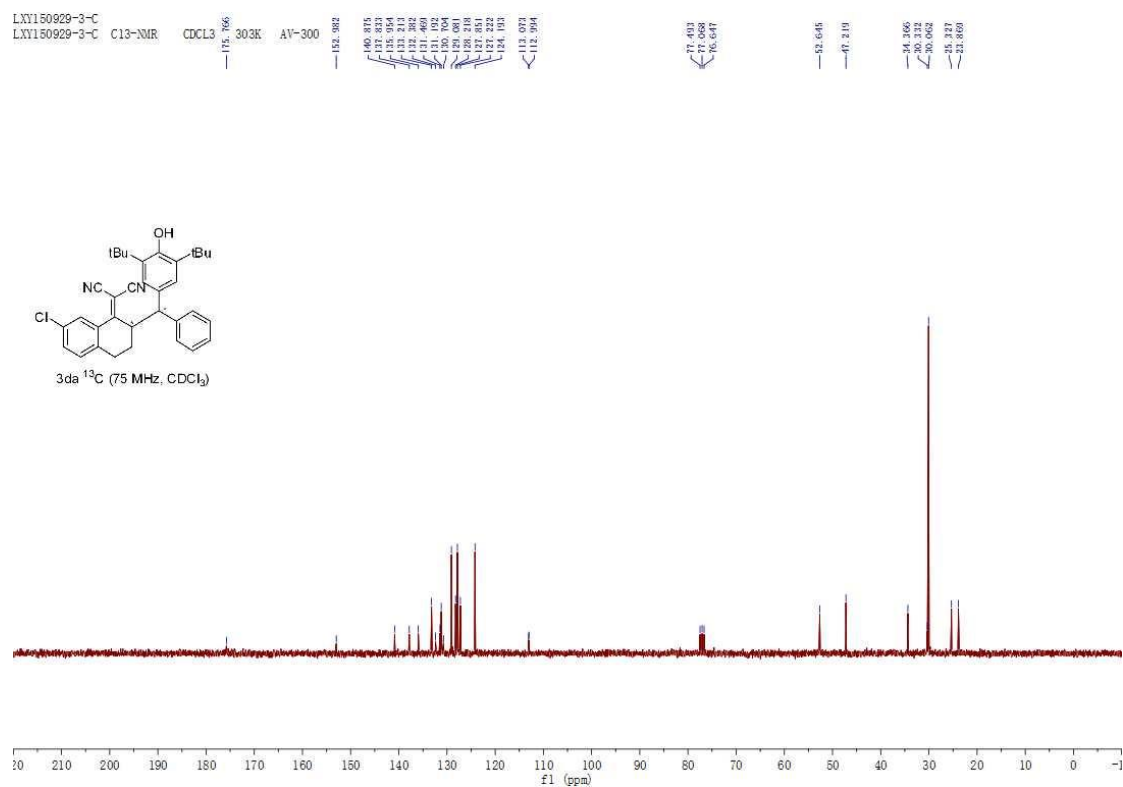



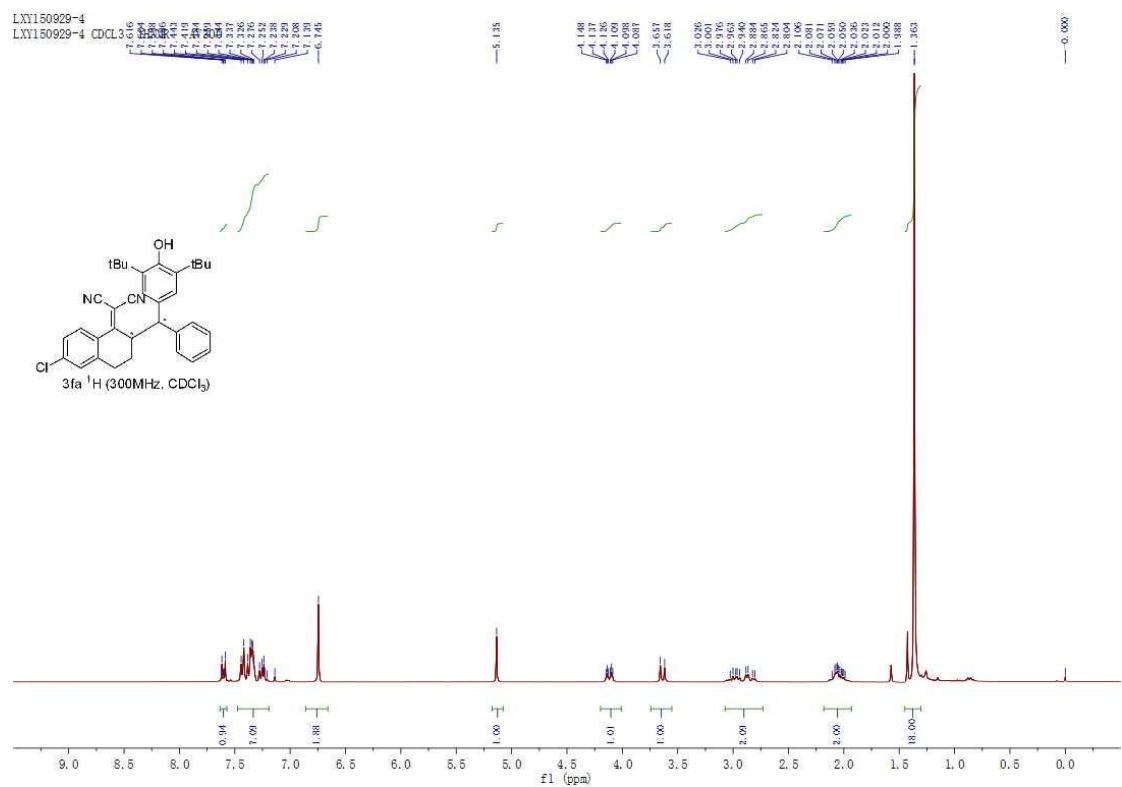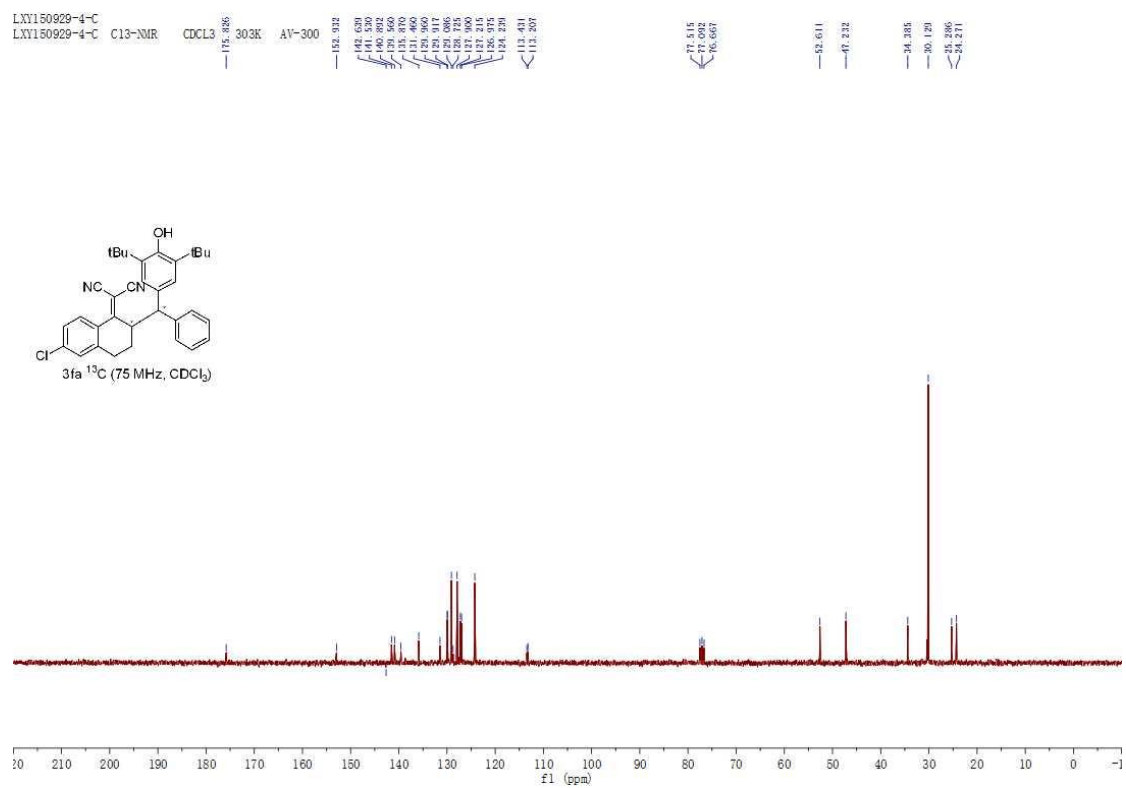

LXY151119-3 11.19

LXY151119-3 11.19 CDCL<sub>3</sub> 1HMR

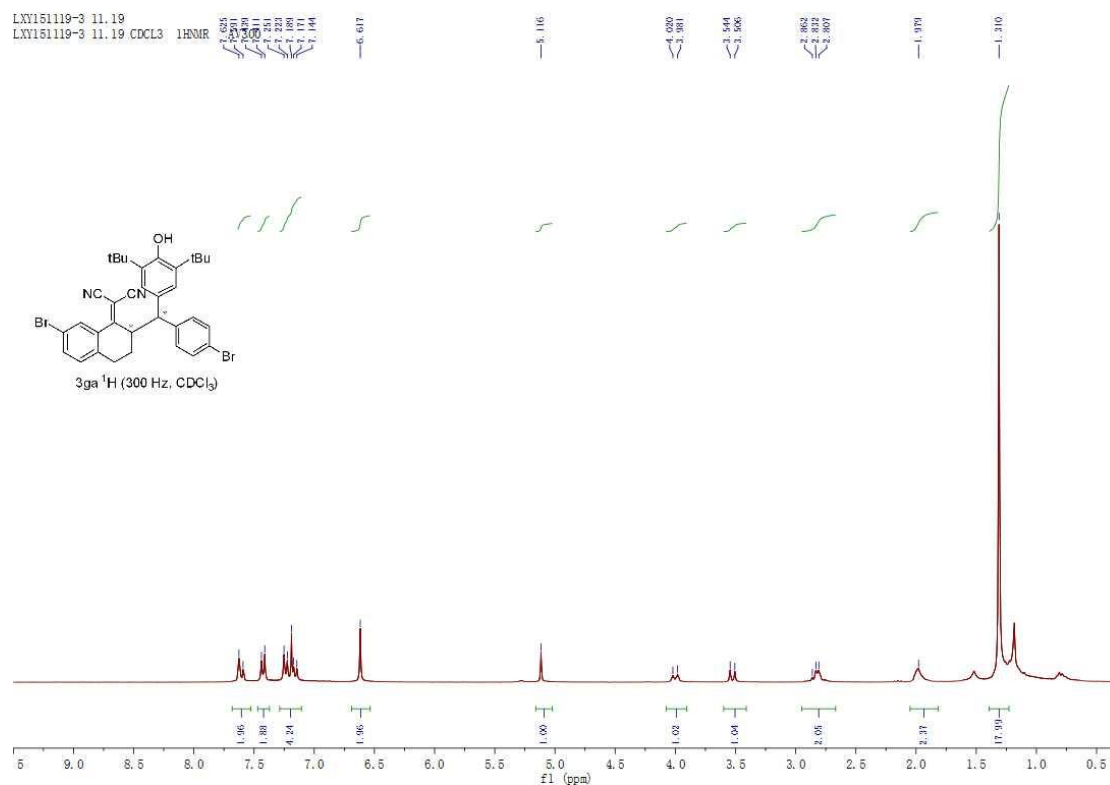

LXY150930-3-C

LXY150930-3-C C13-NMR

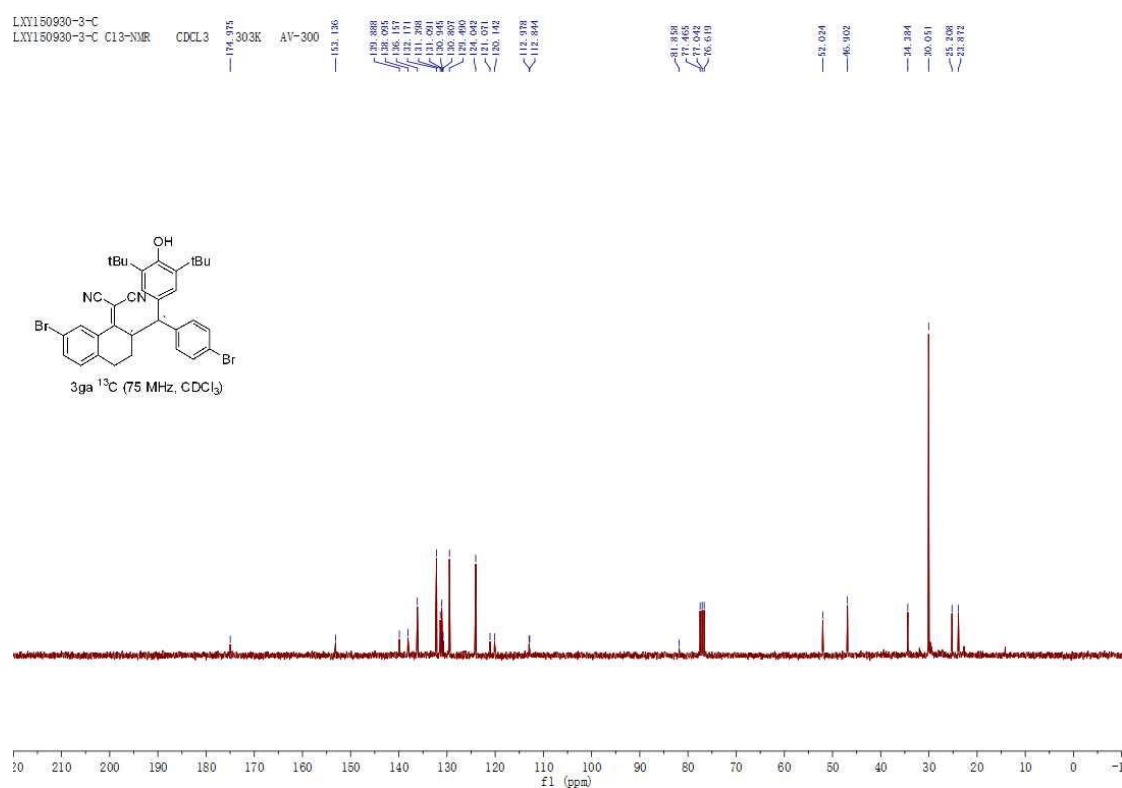

LXY151119-2 11.19  
LXY151119-2 11.19 CDCl<sub>3</sub> 1H-NMR

7.387, 7.380, 7.373, 7.366, 7.359, 7.352, 7.345, 7.338, 7.331, 7.324, 7.317, 7.310, 7.303, 7.296, 7.289, 7.282, 7.275, 7.268, 7.261, 7.254, 7.247, 7.240, 7.233, 7.226, 7.219, 7.212, 7.205, 7.198, 7.191, 7.184, 7.177, 7.170, 7.163, 7.156, 7.149, 7.142, 7.135, 7.128, 7.121, 7.114, 7.107, 7.100, 7.093, 7.086, 7.079, 7.072, 7.065, 7.058, 7.051, 7.044, 7.037, 7.030, 7.023, 7.016, 7.009, 7.002, 6.995, 6.988, 6.981, 6.974, 6.967, 6.960, 6.953, 6.946, 6.939, 6.932, 6.925, 6.918, 6.911, 6.904, 6.897, 6.890, 6.883, 6.876, 6.869, 6.862, 6.855, 6.848, 6.841, 6.834, 6.827, 6.820, 6.813, 6.806, 6.799, 6.792, 6.785, 6.778, 6.771, 6.764, 6.757, 6.750, 6.743, 6.736, 6.729, 6.722, 6.715, 6.708, 6.701, 6.694, 6.687, 6.680, 6.673, 6.666, 6.659, 6.652, 6.645, 6.638, 6.631, 6.624, 6.617, 6.610, 6.603, 6.596, 6.589, 6.582, 6.575, 6.568, 6.561, 6.554, 6.547, 6.540, 6.533, 6.526, 6.519, 6.512, 6.505, 6.498, 6.491, 6.484, 6.477, 6.470, 6.463, 6.456, 6.449, 6.442, 6.435, 6.428, 6.421, 6.414, 6.407, 6.400, 6.393, 6.386, 6.379, 6.372, 6.365, 6.358, 6.351, 6.344, 6.337, 6.330, 6.323, 6.316, 6.309, 6.302, 6.295, 6.288, 6.281, 6.274, 6.267, 6.260, 6.253, 6.246, 6.239, 6.232, 6.225, 6.218, 6.211, 6.204, 6.197, 6.190, 6.183, 6.176, 6.169, 6.162, 6.155, 6.148, 6.141, 6.134, 6.127, 6.120, 6.113, 6.106, 6.099, 6.092, 6.085, 6.078, 6.071, 6.064, 6.057, 6.050, 6.043, 6.036, 6.029, 6.022, 6.015, 6.008, 6.001, 5.994, 5.987, 5.980, 5.973, 5.966, 5.959, 5.952, 5.945, 5.938, 5.931, 5.924, 5.917, 5.910, 5.903, 5.896, 5.889, 5.882, 5.875, 5.868, 5.861, 5.854, 5.847, 5.840, 5.833, 5.826, 5.819, 5.812, 5.805, 5.798, 5.791, 5.784, 5.777, 5.770, 5.763, 5.756, 5.749, 5.742, 5.735, 5.728, 5.721, 5.714, 5.707, 5.700, 5.693, 5.686, 5.679, 5.672, 5.665, 5.658, 5.651, 5.644, 5.637, 5.630, 5.623, 5.616, 5.609, 5.602, 5.595, 5.588, 5.581, 5.574, 5.567, 5.560, 5.553, 5.546, 5.539, 5.532, 5.525, 5.518, 5.511, 5.504, 5.497, 5.490, 5.483, 5.476, 5.469, 5.462, 5.455, 5.448, 5.441, 5.434, 5.427, 5.420, 5.413, 5.406, 5.399, 5.392, 5.385, 5.378, 5.371, 5.364, 5.357, 5.350, 5.343, 5.336, 5.329, 5.322, 5.315, 5.308, 5.301, 5.294, 5.287, 5.280, 5.273, 5.266, 5.259, 5.252, 5.245, 5.238, 5.231, 5.224, 5.217, 5.210, 5.203, 5.196, 5.189, 5.182, 5.175, 5.168, 5.161, 5.154, 5.147, 5.140, 5.133, 5.126, 5.119, 5.112, 5.105, 5.098, 5.091, 5.084, 5.077, 5.070, 5.063, 5.056, 5.049, 5.042, 5.035, 5.028, 5.021, 5.014, 5.007, 4.999, 4.992, 4.985, 4.978, 4.971, 4.964, 4.957, 4.950, 4.943, 4.936, 4.929, 4.922, 4.915, 4.908, 4.901, 4.894, 4.887, 4.880, 4.873, 4.866, 4.859, 4.852, 4.845, 4.838, 4.831, 4.824, 4.817, 4.810, 4.803, 4.796, 4.789, 4.782, 4.775, 4.768, 4.761, 4.754, 4.747, 4.740, 4.733, 4.726, 4.719, 4.712, 4.705, 4.698, 4.691, 4.684, 4.677, 4.670, 4.663, 4.656, 4.649, 4.642, 4.635, 4.628, 4.621, 4.614, 4.607, 4.600, 4.593, 4.586, 4.579, 4.572, 4.565, 4.558, 4.551, 4.544, 4.537, 4.530, 4.523, 4.516, 4.509, 4.502, 4.495, 4.488, 4.481, 4.474, 4.467, 4.460, 4.453, 4.446, 4.439, 4.432, 4.425, 4.418, 4.411, 4.404, 4.397, 4.390, 4.383, 4.376, 4.369, 4.362, 4.355, 4.348, 4.341, 4.334, 4.327, 4.320, 4.313, 4.306, 4.299, 4.292, 4.285, 4.278, 4.271, 4.264, 4.257, 4.250, 4.243, 4.236, 4.229, 4.222, 4.215, 4.208, 4.201, 4.194, 4.187, 4.180, 4.173, 4.166, 4.159, 4.152, 4.145, 4.138, 4.131, 4.124, 4.117, 4.110, 4.103, 4.096, 4.089, 4.082, 4.075, 4.068, 4.061, 4.054, 4.047, 4.040, 4.033, 4.026, 4.019, 4.012, 4.005, 3.998, 3.991, 3.984, 3.977, 3.970, 3.963, 3.956, 3.949, 3.942, 3.935, 3.928, 3.921, 3.914, 3.907, 3.900, 3.893, 3.886, 3.879, 3.872, 3.865, 3.858, 3.851, 3.844, 3.837, 3.830, 3.823, 3.816, 3.809, 3.802, 3.795, 3.788, 3.781, 3.774, 3.767, 3.760, 3.753, 3.746, 3.739, 3.732, 3.725, 3.718, 3.711, 3.704, 3.697, 3.690, 3.683, 3.676, 3.669, 3.662, 3.655, 3.648, 3.641, 3.634, 3.627, 3.620, 3.613, 3.606, 3.599, 3.592, 3.585, 3.578, 3.571, 3.564, 3.557, 3.550, 3.543, 3.536, 3.529, 3.522, 3.515, 3.508, 3.501, 3.494, 3.487, 3.480, 3.473, 3.466, 3.459, 3.452, 3.445, 3.438, 3.431, 3.424, 3.417, 3.410, 3.403, 3.396, 3.389, 3.382, 3.375, 3.368, 3.361, 3.354, 3.347, 3.340, 3.333, 3.326, 3.319, 3.312, 3.305, 3.298, 3.291, 3.284, 3.277, 3.270, 3.263, 3.256, 3.249, 3.242, 3.235, 3.228, 3.221, 3.214, 3.207, 3.200, 3.193, 3.186, 3.179, 3.172, 3.165, 3.158, 3.151, 3.144, 3.137, 3.130, 3.123, 3.116, 3.109, 3.102, 3.095, 3.088, 3.081, 3.074, 3.067, 3.060, 3.053, 3.046, 3.039, 3.032, 3.025, 3.018, 3.011, 3.004, 2.997, 2.990, 2.983, 2.976, 2.969, 2.962, 2.955, 2.948, 2.941, 2.934, 2.927, 2.920, 2.913, 2.906, 2.899, 2.892, 2.885, 2.878, 2.871, 2.864, 2.857, 2.850, 2.843, 2.836, 2.829, 2.822, 2.815, 2.808, 2.801, 2.794, 2.787, 2.780, 2.773, 2.766, 2.759, 2.752, 2.745, 2.738, 2.731, 2.724, 2.717, 2.710, 2.703, 2.696, 2.689, 2.682, 2.675, 2.668, 2.661, 2.654, 2.647, 2.640, 2.633, 2.626, 2.619, 2.612, 2.605, 2.598, 2.591, 2.584, 2.577, 2.570, 2.563, 2.556, 2.549, 2.542, 2.535, 2.528, 2.521, 2.514, 2.507, 2.500, 2.493, 2.486, 2.479, 2.472, 2.465, 2.458, 2.451, 2.444, 2.437, 2.430, 2.423, 2.416, 2.409, 2.402, 2.395, 2.388, 2.381, 2.374, 2.367, 2.360, 2.353, 2.346, 2.339, 2.332, 2.325, 2.318, 2.311, 2.304, 2.297, 2.290, 2.283, 2.276, 2.269, 2.262, 2.255, 2.248, 2.241, 2.234, 2.227, 2.220, 2.213, 2.206, 2.199, 2.192, 2.185, 2.178, 2.171, 2.164, 2.157, 2.150, 2.143, 2.136, 2.129, 2.122, 2.115, 2.108, 2.101, 2.094, 2.087, 2.080, 2.073, 2.066, 2.059, 2.052, 2.045, 2.038, 2.031, 2.024, 2.017, 2.010, 2.003, 1.996, 1.989, 1.982, 1.975, 1.968, 1.961, 1.954, 1.947, 1.940, 1.933, 1.926, 1.919, 1.912, 1.905, 1.898, 1.891, 1.884, 1.877, 1.870, 1.863, 1.856, 1.849, 1.842, 1.835, 1.828, 1.821, 1.814, 1.807, 1.800, 1.793, 1.786, 1.779, 1.772, 1.765, 1.758, 1.751, 1.744, 1.737, 1.730, 1.723, 1.716, 1.709, 1.702, 1.695, 1.688, 1.681, 1.674, 1.667, 1.660, 1.653, 1.646, 1.639, 1.632, 1.625, 1.618, 1.611, 1.604, 1.597, 1.590, 1.583, 1.576, 1.569, 1.562, 1.555, 1.548, 1.541, 1.534, 1.527, 1.520, 1.513, 1.506, 1.499, 1.492, 1.485, 1.478, 1.471, 1.464, 1.457, 1.450, 1.443, 1.436, 1.429, 1.422, 1.415, 1.408, 1.401, 1.394, 1.387, 1.380, 1.373, 1.366, 1.359, 1.352, 1.345, 1.338, 1.331, 1.324, 1.317, 1.310, 1.303, 1.296, 1.289, 1.282, 1.275, 1.268, 1.261, 1.254, 1.247, 1.240, 1.233, 1.226, 1.219, 1.212, 1.205, 1.198, 1.191, 1.184, 1.177, 1.170, 1.163, 1.156, 1.149, 1.142, 1.135, 1.128, 1.121, 1.114, 1.107, 1.100, 1.093, 1.086, 1.079, 1.072, 1.065, 1.058, 1.051, 1.044, 1.037, 1.030, 1.023, 1.016, 1.009, 1.002, 9.995, 9.988, 9.981, 9.974, 9.967, 9.960, 9.953, 9.946, 9.939, 9.932, 9.925, 9.918, 9.911, 9.904, 9.897, 9.890, 9.883, 9.876, 9.869, 9.862, 9.855, 9.848, 9.841, 9.834, 9.827, 9.820, 9.813, 9.806, 9.799, 9.792, 9.785, 9.778, 9.771, 9.764, 9.757, 9.750, 9.743, 9.736, 9.729, 9.722, 9.715, 9.708, 9.701, 9.694, 9.687, 9.680, 9.673, 9.666, 9.659, 9.652, 9.645, 9.638, 9.631, 9.624, 9.617, 9.610, 9.603, 9.596, 9.589, 9.582, 9.575, 9.568, 9.561, 9.554, 9.547, 9.540, 9.533, 9.526, 9.519, 9.512, 9.505, 9.498, 9.491, 9.484, 9.477, 9.470, 9.463, 9.456, 9.449, 9.442, 9.435, 9.428, 9.421, 9.414, 9.407, 9.400, 9.393, 9.386, 9.379, 9.372, 9.365, 9.358, 9.351, 9.344, 9.337, 9.330, 9.323, 9.316, 9.309, 9.302, 9.295, 9.288, 9.281, 9.274, 9.267, 9.260, 9.253, 9.246, 9.239, 9.232, 9.225, 9.218, 9.211, 9.204, 9.197, 9.190, 9.183, 9.176, 9.169, 9.162, 9.155, 9.148, 9.141, 9.134, 9.127, 9.120, 9.113, 9.106, 9.099, 9.092, 9.085, 9.078, 9.071, 9.064, 9.057, 9.050, 9.043, 9.036, 9.029, 9.022, 9.015, 9.008, 8.999, 8.992, 8.985, 8.978, 8.971, 8.964, 8.957, 8.950, 8.943, 8.936, 8.929, 8.922, 8.915, 8.908, 8.901, 8.894, 8.887, 8.880, 8.873, 8.866, 8.859, 8.852, 8.845, 8.838, 8.831, 8.824, 8.817, 8.810, 8.803, 8.796, 8.789, 8.782, 8.775, 8.768, 8.761, 8.754, 8.747, 8.740, 8.733, 8.726, 8.719, 8.712, 8.705, 8.698, 8.691, 8.684, 8.677, 8.670, 8.663, 8.656, 8.649, 8.642, 8.635, 8.628, 8.621, 8.614, 8.607, 8.600, 8.593, 8.586, 8.579, 8.572, 8.565, 8.558, 8.551, 8.544, 8.537, 8.530, 8.523, 8.516, 8.509, 8.502, 8.495, 8.488, 8.481, 8.474, 8.467, 8.460, 8.453, 8.446, 8.439, 8.432, 8.425, 8.418, 8.411, 8.404, 8.397, 8.390, 8.383, 8.376, 8.369, 8.362, 8.355, 8.348, 8.341, 8.334, 8.327, 8.320, 8.313, 8.306, 8.299, 8.292, 8.285, 8.278, 8.271, 8.264, 8.257, 8.250, 8.243, 8.236, 8.229, 8.222, 8.215, 8.208, 8.201, 8.194, 8.187, 8.180, 8.173, 8.166, 8.159, 8.152, 8.145, 8.138, 8.131, 8.124, 8.117, 8.110, 8.103, 8.096, 8.089, 8.082, 8.075, 8.068, 8.061, 8.054, 8.047, 8.040, 8.033, 8.026, 8.019, 8.012, 8.005, 7.998, 7.991, 7.984, 7.977, 7.970, 7.963, 7.956, 7.949, 7.942, 7.935, 7.928, 7.921, 7.914, 7.907, 7.900, 7.893, 7.886, 7.879, 7.872, 7.865, 7.858, 7.851, 7.844, 7.837, 7.830, 7.823, 7.816, 7.809, 7.802, 7.795, 7.788, 7.781, 7.774, 7.767, 7.760, 7.753, 7.746, 7.739, 7.732, 7.725, 7.718, 7.711, 7.704, 7.697, 7.690, 7.683, 7.676, 7.669, 7.662, 7.655, 7.648, 7.641, 7.634, 7.627, 7.620, 7.613, 7.606, 7.599, 7.592, 7.585, 7.578, 7.571, 7.564, 7.557, 7.550, 7.543, 7.536, 7.529, 7.522, 7.515, 7.508, 7.501, 7.494, 7.487, 7.480, 7.473, 7.466, 7.459, 7.452, 7.445, 7.438, 7.431, 7.424, 7.417, 7.410, 7.403, 7.396, 7.389, 7.382, 7.375, 7.368, 7.361, 7.354, 7.347, 7.340, 7.333, 7.326, 7.319, 7.312, 7.305, 7.298, 7.291, 7.284, 7.277, 7.270, 7.263, 7.256, 7.249, 7.242, 7.235, 7.228, 7.221, 7.214, 7.207, 7.200, 7.193, 7.186, 7.179, 7.172, 7.165, 7.158, 7.151, 7.144, 7.137, 7.130, 7.123, 7.116, 7.109, 7.102, 7.095, 7.088, 7.081, 7.074, 7.067, 7.060, 7.053, 7.046, 7.039, 7.032, 7.025, 7.018, 7.011, 7.004, 6.997, 6.990, 6.983, 6.976, 6.969, 6.962, 6.955, 6.948, 6.941, 6.934, 6.927, 6.920, 6.913, 6.906, 6.899, 6.892, 6.885, 6.878, 6.871, 6.864, 6.857, 6.850, 6.843, 6.836, 6.829, 6.822, 6.815, 6.808, 6.801, 6.794, 6.787, 6.780, 6.773, 6.766, 6.759, 6.752, 6.745, 6.738, 6.731, 6.724, 6.717, 6.710, 6.703, 6.696, 6.689, 6.682, 6.675, 6.668, 6.661, 6.654, 6.647, 6.640, 6.633, 6.626, 6.619, 6.612, 6.605, 6.598, 6.591, 6.584, 6.577, 6.570, 6.563, 6.556, 6.549, 6.542, 6.535, 6.528, 6.521, 6.514, 6.507, 6.500, 6.493, 6.486, 6.479, 6.472, 6.465, 6.458, 6.451, 6.444, 6.437, 6.430, 6.423, 6.416, 6.409, 6.402, 6.395, 6.388, 6.381, 6.374, 6.367, 6.360, 6.353, 6.346, 6.339, 6.332, 6.325, 6.318, 6.311, 6.304, 6.297, 6.290, 6.283, 6.276, 6.269, 6.262, 6.255, 6.248, 6.241, 6.234, 6.227, 6.220, 6.213, 6.206, 6.199, 6.192, 6.185, 6.178, 6.171, 6.164, 6.157, 6.150, 6.143, 6.136, 6.129, 6.122, 6.115, 6.108, 6.101, 6.094, 6.087, 6.080, 6.073, 6.066, 6.059, 6.052, 6.045, 6.038, 6.031, 6.024, 6.017, 6.010, 6.003, 5.996, 5.989, 5.982, 5.975, 5.968, 5.961, 5.954, 5.947, 5.940, 5.933, 5.926, 5.919, 5.912, 5.905, 5.898, 5.891, 5.884, 5.877, 5.870, 5.863, 5.856, 5.849, 5.842, 5.835, 5.828, 5.821, 5.814, 5.807, 5.800, 5.793, 5.786, 5.779, 5.772, 5.765, 5.758, 5.751, 5.744, 5.737, 5.730, 5.723, 5.716, 5.709, 5.702, 5.695, 5.688, 5.681, 5.674, 5.667, 5.660, 5.653, 5.646, 5.639, 5.632, 5.625, 5.618, 5.611, 5.604, 5.597, 5.590, 5.583, 5.576, 5.569, 5.562, 5.555, 5.548, 5.541, 5.534, 5.527, 5.520, 5.513, 5.506, 5.499, 5.492, 5.485, 5.478, 5.471, 5.464, 5.457, 5.450, 5.443, 5.436, 5.429, 5.422, 5.415, 5.408, 5.401, 5.394, 5.387, 5.380, 5.373, 5.366, 5.359, 5.352, 5.345, 5.338, 5.331, 5.324, 5.317, 5.310, 5.303, 5.296, 5.289, 5.282, 5.275, 5.268, 5.261, 5.254, 5.247, 5.240, 5.233, 5.226, 5.219, 5.212, 5.205, 5.198, 5.191, 5.184, 5.177, 5.170, 5.163, 5.156, 5.149, 5.142, 5.135, 5.128, 5.121, 5.114, 5.107, 5.100, 5.093, 5.086, 5.079, 5.072, 5.065, 5.058, 5.051, 5.044, 5.037, 5.030, 5.023, 5.016, 5.009, 4.999, 4.992, 4.985, 4.978, 4.971, 4.964, 4.957, 4.950, 4.943, 4.936, 4.929, 4.922, 4.915, 4.908, 4.901, 4.894, 4.887, 4.880, 4.873, 4.866, 4.859, 4.852, 4.845, 4.838, 4.831, 4.824, 4.817, 4.810, 4.803, 4.796, 4.789, 4.782, 4.775, 4.768, 4.761, 4.754, 4.747, 4.740, 4.733, 4.726, 4.719, 4.712, 4.705, 4.698, 4.691, 4.684, 4.677, 4.670, 4.663, 4.656, 4.649, 4.642, 4.635, 4.628, 4.621, 4.614, 4.607, 4.600, 4.593, 4.586, 4.579, 4.572, 4.565, 4.558, 4.551, 4.544, 4.537, 4.530, 4.523, 4.516, 4.509, 4.502, 4.495, 4.488, 4.481, 4.474, 4.467, 4.460, 4.453, 4.446, 4.439, 4.432, 4.425, 4.418, 4.411, 4.404, 4.397, 4.390, 4.383, 4.376, 4.369, 4.362, 4.355, 4.348, 4.341, 4.334, 4.327, 4.320, 4.313, 4.306, 4.299, 4.292, 4.285, 4.278, 4.271, 4.264, 4.257, 4.250, 4.243, 4.236, 4.229, 4.222, 4.215, 4.208, 4.201, 4.194, 4.187, 4.180, 4.173, 4.166, 4.159, 4.152, 4.145, 4.138, 4.131, 4.124, 4.117,



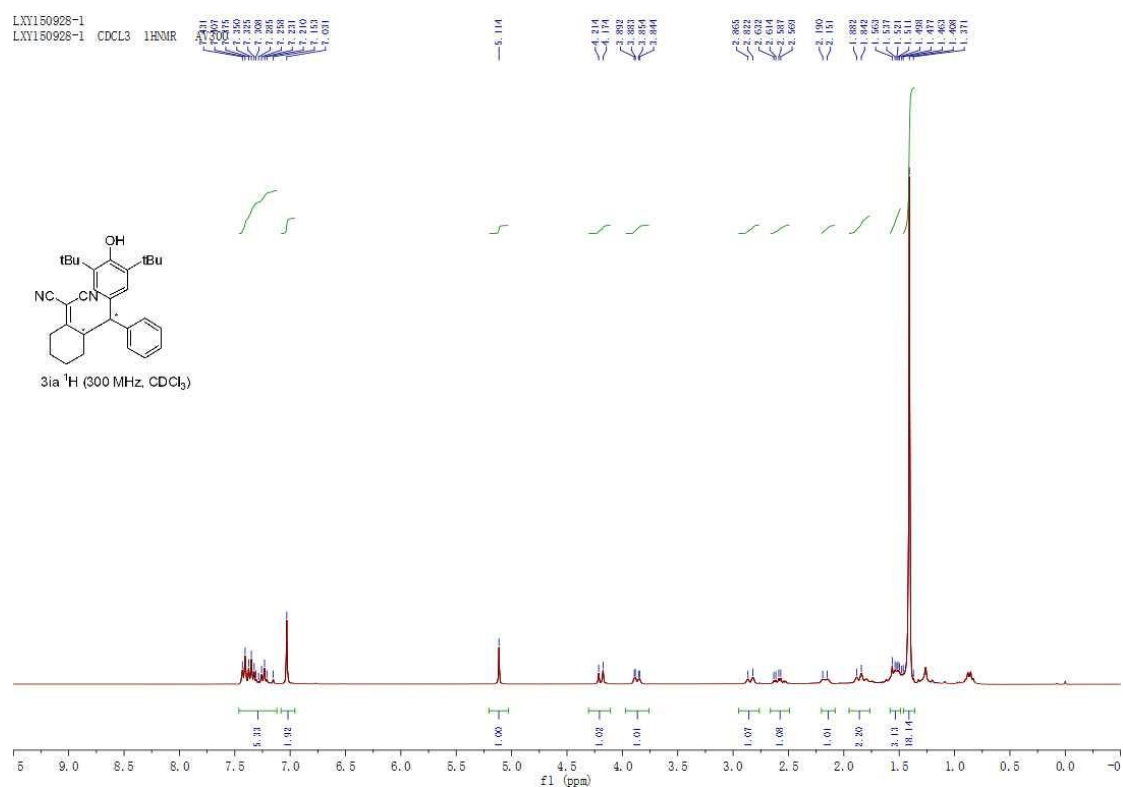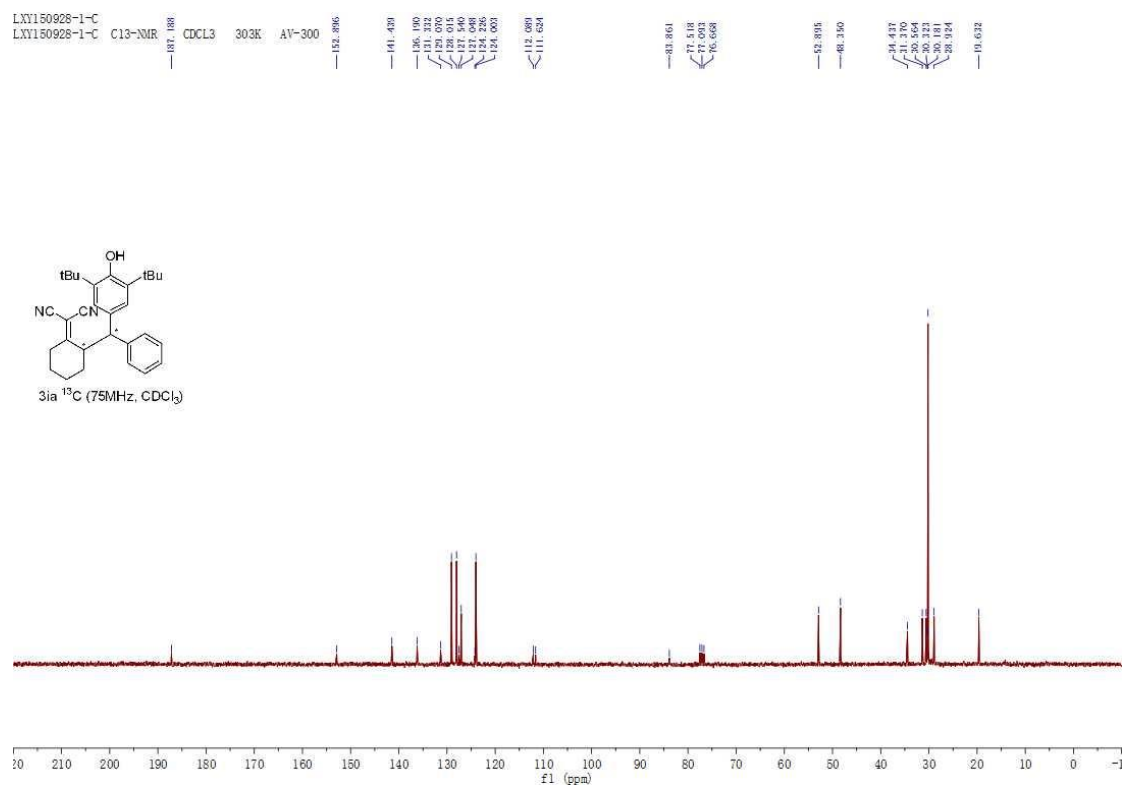

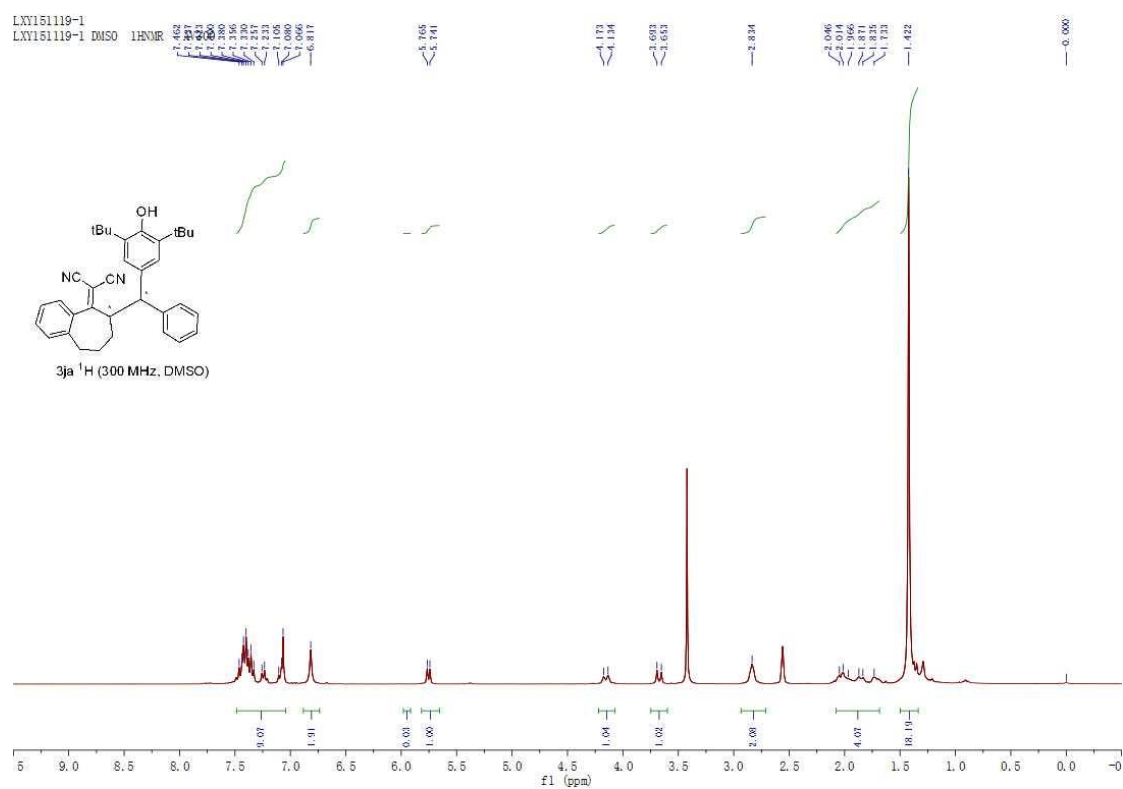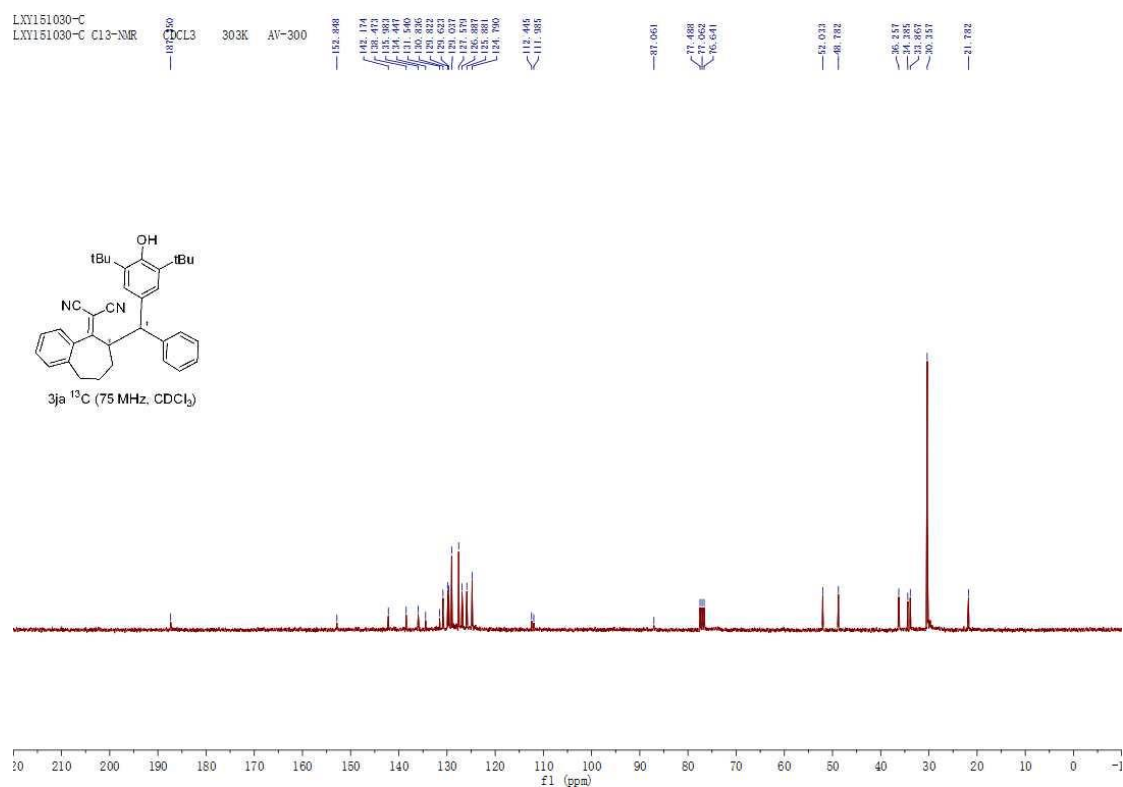

CC1(C)C(C#N)C(C#N)C(C1Cc2ccccc2)C3=CC=CC=C3

3ka  $^1\text{H}$  (300 MHz,  $\text{CDCl}_3$ )

10  
9  
8  
7  
6  
5  
4  
3  
2  
1  
0

1.91  
1.14  
1.08  
1.00  
1.91  
1.00  
1.03  
0.99  
1.00  
1.01  
18.23

f1 (ppm)

<sup>13</sup>C NMR spectrum (75 MHz, CDCl<sub>3</sub>) of compound 3ka. The chemical structure of 3ka is shown above the spectrum. The spectrum displays peaks corresponding to the following chemical shifts (ppm): 172.036, 153.009, 140.721, 137.735, 135.711, 133.281, 130.818, 130.724, 129.714, 127.427, 127.417, 125.965, 124.606, 124.266, 113.151, 112.077, 77.469, 77.046, 76.622, 51.396, 41.898, 34.235, 33.135, 30.136, 29.184.

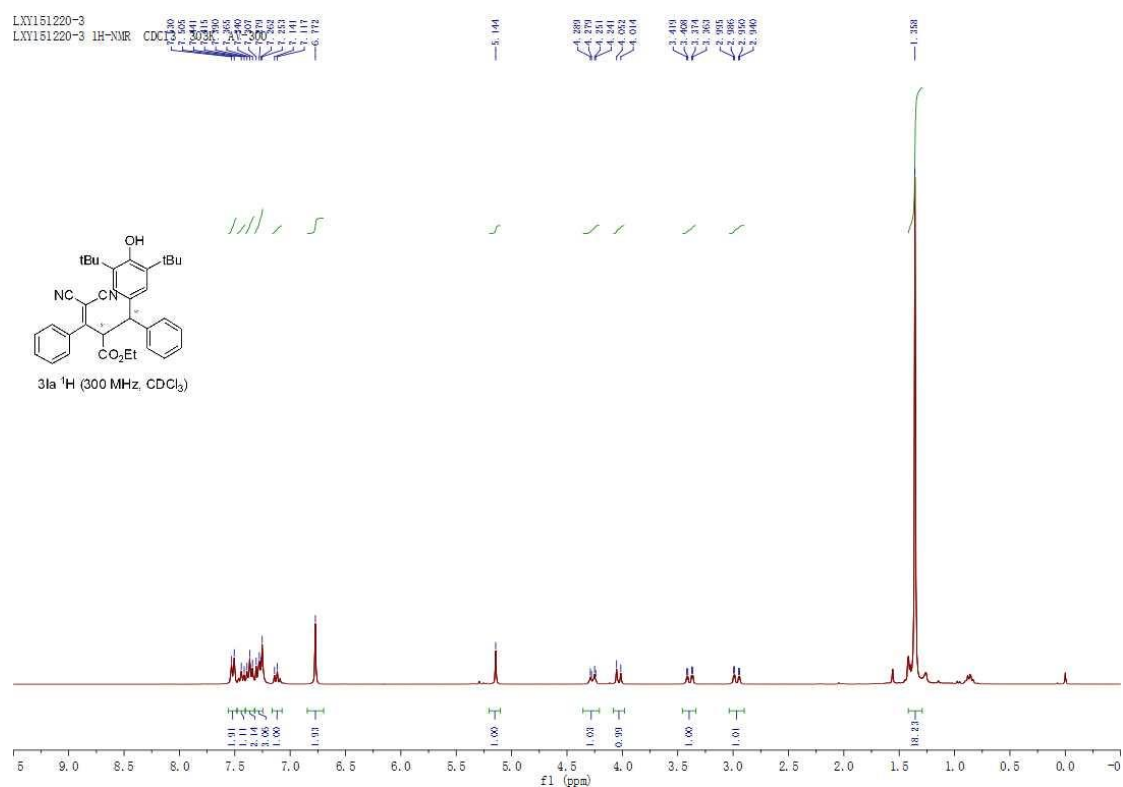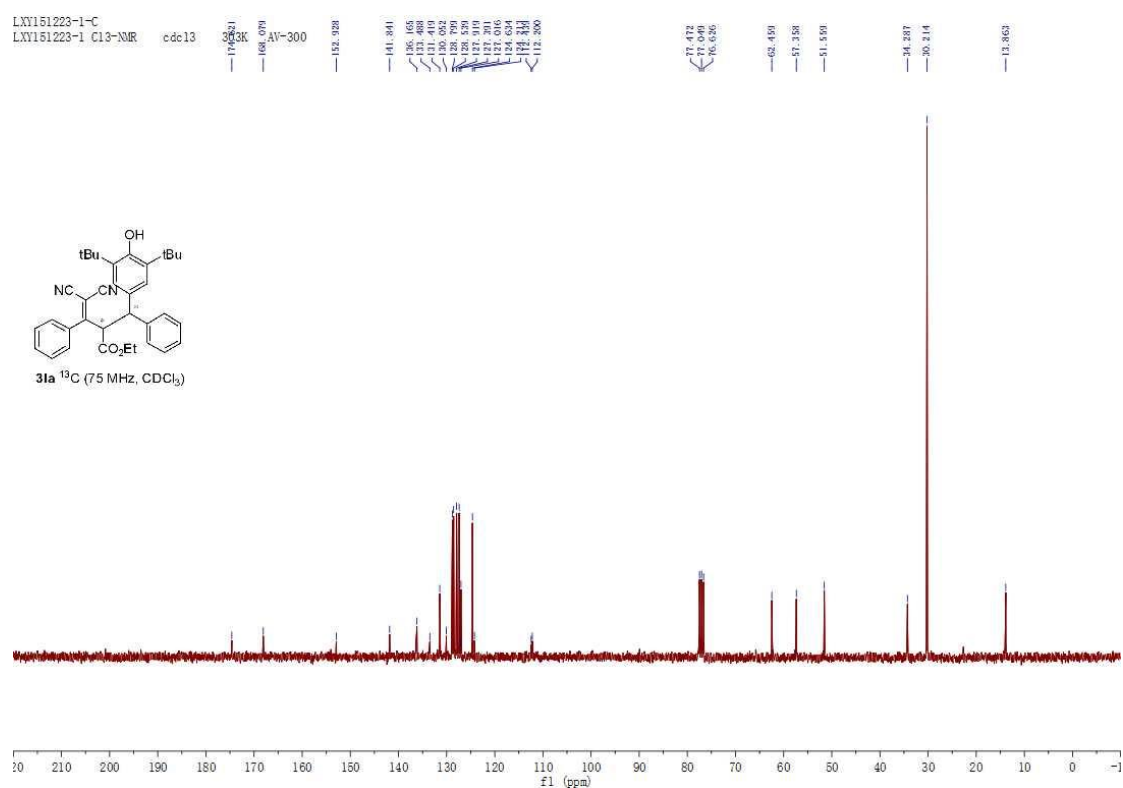

## 8. HPLC analysis

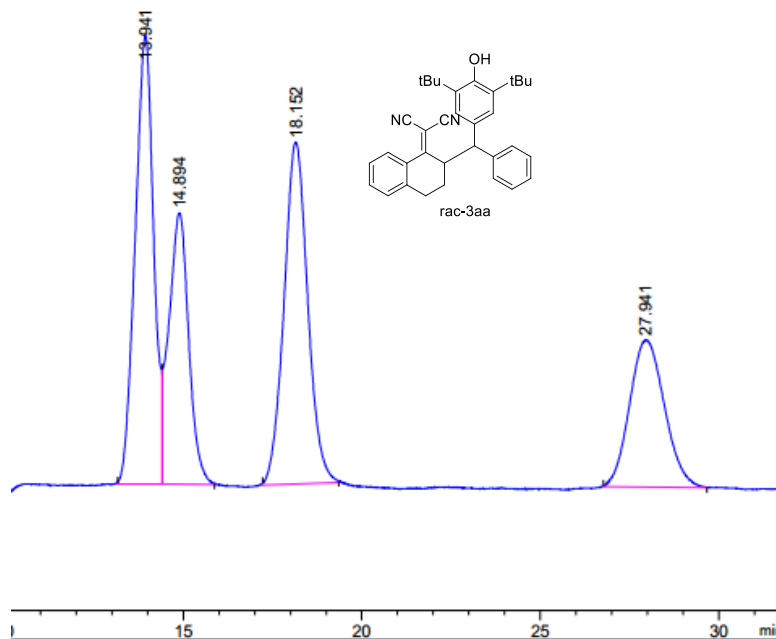

| Peak # | RetTime [min] | Type | Width [min] | Area [mAU*s] | Height [mAU] | Area %  |
|--------|---------------|------|-------------|--------------|--------------|---------|
| 1      | 13.941        | BV   | 0.5284      | 401.57260    | 11.19847     | 30.7488 |
| 2      | 14.894        | VB   | 0.5435      | 263.29697    | 6.77319      | 20.1609 |
| 3      | 18.152        | BB   | 0.6645      | 392.17157    | 8.52834      | 30.0290 |
| 4      | 27.941        | BB   | 0.8034      | 248.93552    | 3.66955      | 19.0613 |

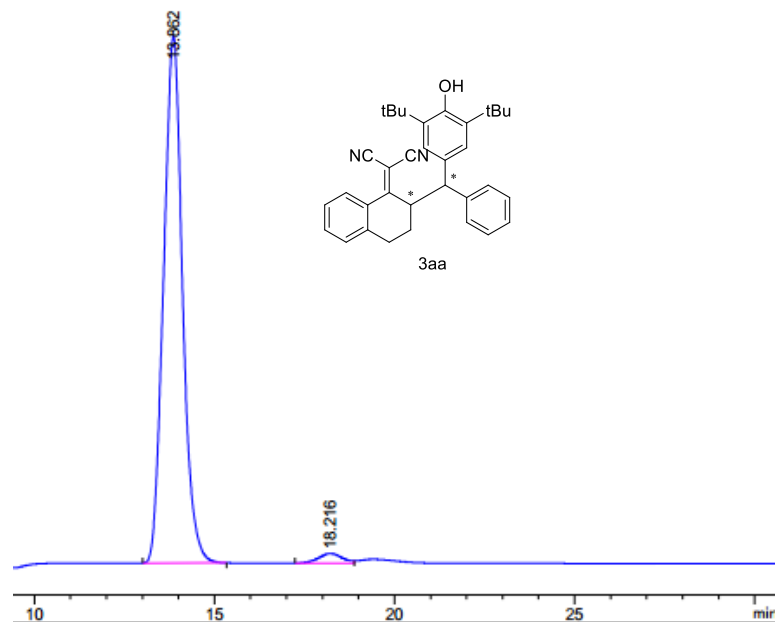

| Peak # | RetTime [min] | Type | Width [min] | Area [mAU*s] | Height [mAU] | Area %  |
|--------|---------------|------|-------------|--------------|--------------|---------|
| 1      | 13.862        | BB   | 0.5569      | 1.08073e4    | 296.70984    | 97.7350 |
| 2      | 18.216        | BV   | 0.6300      | 250.46124    | 5.45147      | 2.2650  |

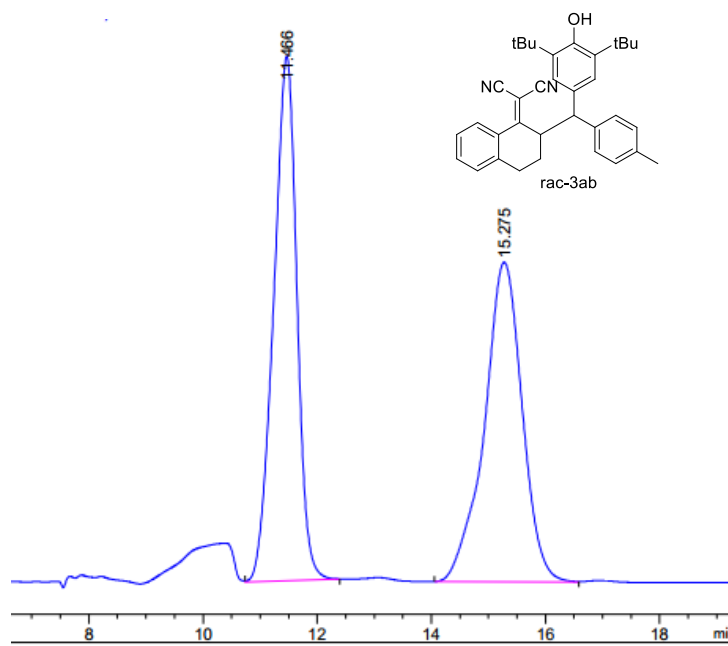

| Peak # | RetTime [min] | Type | Width [min] | Area [mAU*s] | Height [mAU] | Area %  |
|--------|---------------|------|-------------|--------------|--------------|---------|
| 1      | 11.466        | VB   | 0.4275      | 7474.76611   | 264.64288    | 50.1067 |
| 2      | 15.275        | BB   | 0.6984      | 7442.92090   | 161.27902    | 49.8933 |

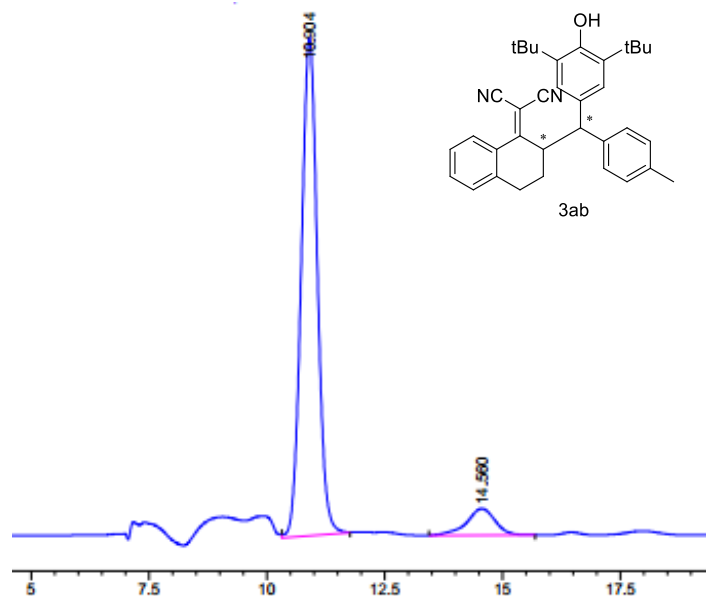

| Peak # | RetTime [min] | Type | Width [min] | Area [mAU*s] | Height [mAU] | Area %  |
|--------|---------------|------|-------------|--------------|--------------|---------|
| 1      | 10.904        | VB   | 0.3685      | 4295.97803   | 181.23276    | 91.3798 |
| 2      | 14.560        | BB   | 0.6200      | 405.25546    | 9.64920      | 8.6202  |

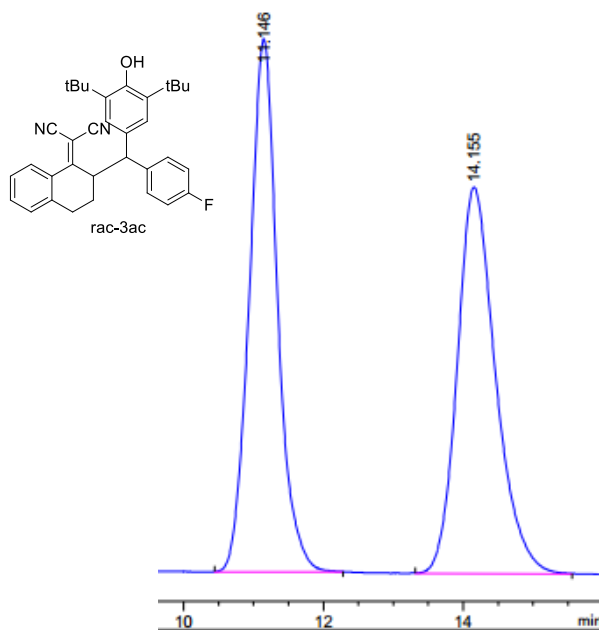

| Peak # | RetTime [min] | Type | Width [min] | Area [mAU*s] | Height [mAU] | Area %  |
|--------|---------------|------|-------------|--------------|--------------|---------|
| 1      | 11.146        | BB   | 0.4200      | 3654.24683   | 130.75867    | 50.2630 |
| 2      | 14.155        | BB   | 0.5754      | 3616.00854   | 94.72015     | 49.7370 |

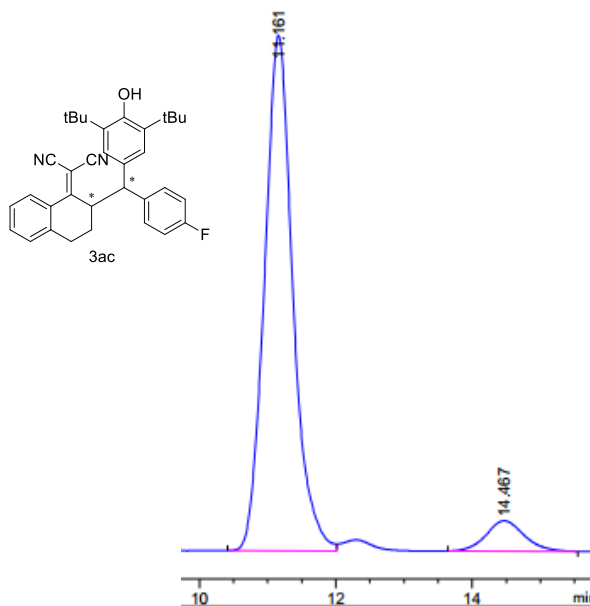

| Peak # | RetTime [min] | Type | Width [min] | Area [mAU*s] | Height [mAU] | Area %  |
|--------|---------------|------|-------------|--------------|--------------|---------|
| 1      | 11.161        | BV   | 0.4314      | 7993.67725   | 278.02841    | 92.6087 |
| 2      | 14.467        | BB   | 0.5815      | 637.99084    | 16.41267     | 7.3913  |

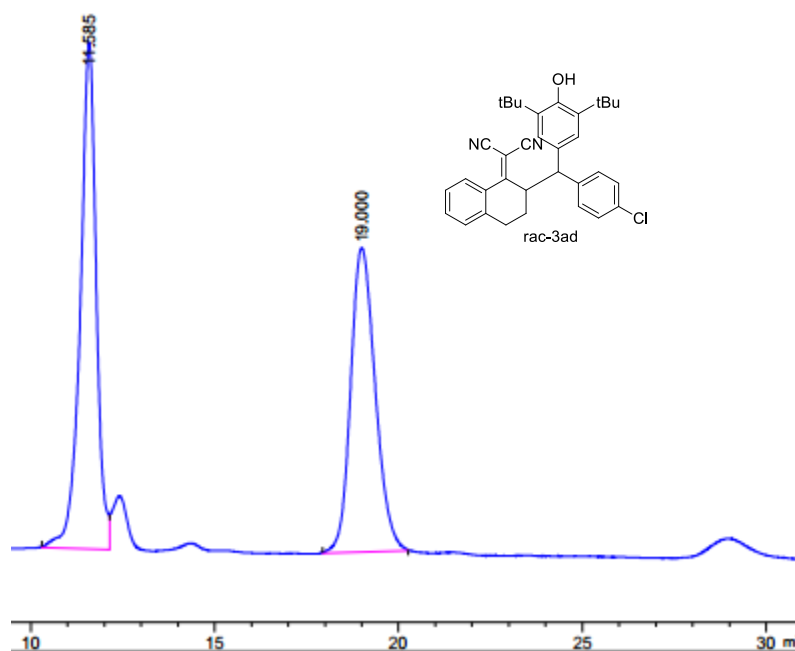

| Peak # | RetTime [min] | Type | Width [min] | Area [mAU*s] | Height [mAU] | Area %  |
|--------|---------------|------|-------------|--------------|--------------|---------|
| 1      | 11.585        | BV   | 0.4467      | 869.62250    | 28.76390     | 51.9305 |
| 2      | 19.000        | BB   | 0.7092      | 804.96796    | 17.28789     | 48.0695 |

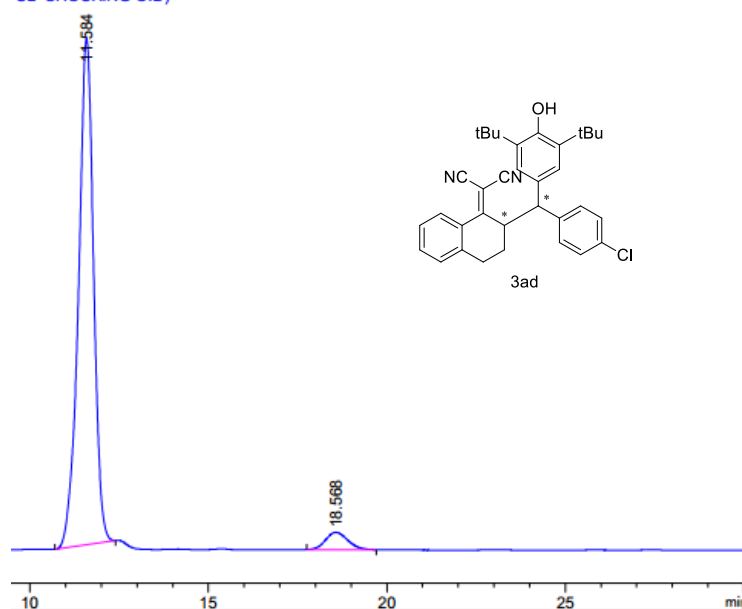

| Peak # | RetTime [min] | Type | Width [min] | Area [mAU*s] | Height [mAU] | Area %  |
|--------|---------------|------|-------------|--------------|--------------|---------|
| 1      | 11.584        | BB   | 0.4432      | 5272.53320   | 179.22054    | 95.1853 |
| 2      | 18.568        | BB   | 0.6030      | 266.69827    | 6.13718      | 4.8147  |



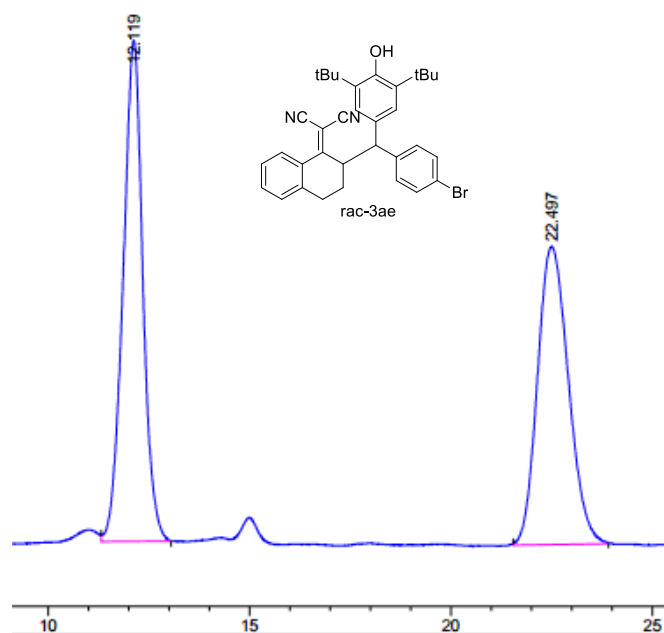

| Peak # | RetTime [min] | Type | Width [min] | Area [mAU*s] | Height [mAU] | Area %  |
|--------|---------------|------|-------------|--------------|--------------|---------|
| 1      | 12.119        | VB   | 0.5040      | 749.22723    | 21.96227     | 51.9176 |
| 2      | 22.497        | BB   | 0.7523      | 693.88245    | 13.05101     | 48.0824 |

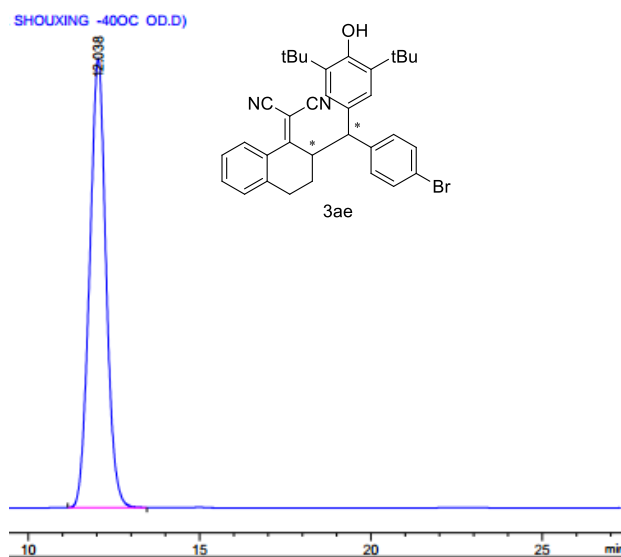

| Peak # | RetTime [min] | Type | Width [min] | Area [mAU*s] | Height [mAU] | Area %   |
|--------|---------------|------|-------------|--------------|--------------|----------|
| 1      | 12.038        | BB   | 0.5056      | 2.21775e4    | 664.13660    | 100.0000 |

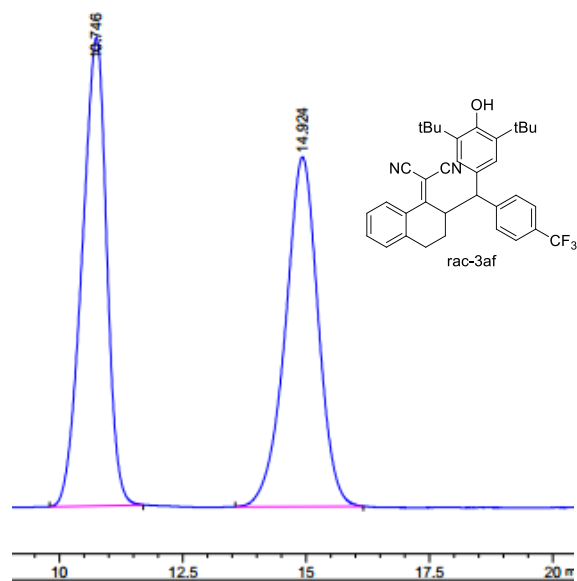

| Peak # | RetTime [min] | Type | Width [min] | Area [mAU*s] | Height [mAU] | Area %  |
|--------|---------------|------|-------------|--------------|--------------|---------|
| 1      | 10.746        | BB   | 0.5303      | 2329.23804   | 67.21255     | 50.0434 |
| 2      | 14.924        | BB   | 0.7027      | 2325.19507   | 50.17455     | 49.9566 |

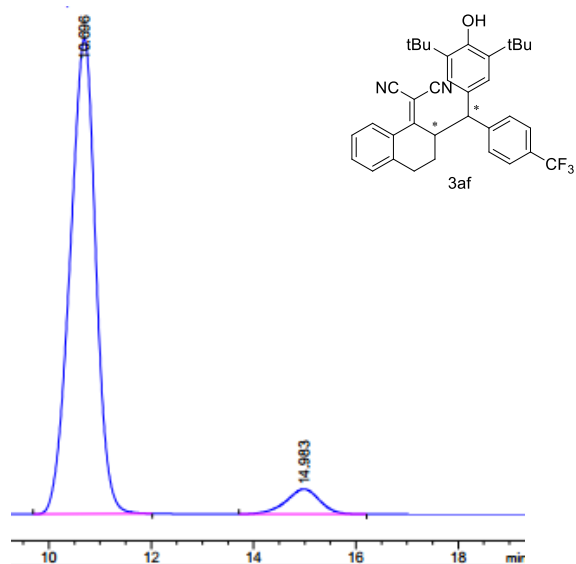

| Peak # | RetTime [min] | Type | Width [min] | Area [mAU*s] | Height [mAU] | Area %  |
|--------|---------------|------|-------------|--------------|--------------|---------|
| 1      | 10.696        | BB   | 0.5412      | 2.02676e4    | 580.63324    | 93.4526 |
| 2      | 14.983        | BB   | 0.6894      | 1419.96655   | 30.71255     | 6.5474  |

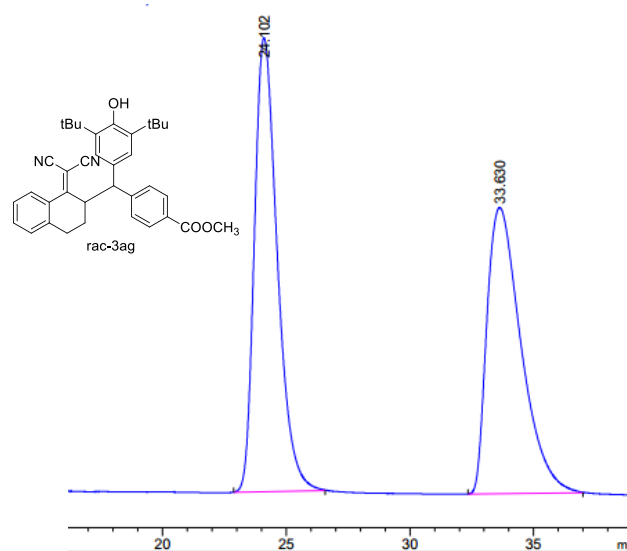

| Peak # | RetTime [min] | Type | Width [min] | Area [mAU*s] | Height [mAU] | Area %  |
|--------|---------------|------|-------------|--------------|--------------|---------|
| 1      | 24.102        | BB   | 0.9777      | 6055.70020   | 94.23968     | 51.5379 |
| 2      | 33.630        | BB   | 1.4039      | 5694.29639   | 59.42558     | 48.4621 |

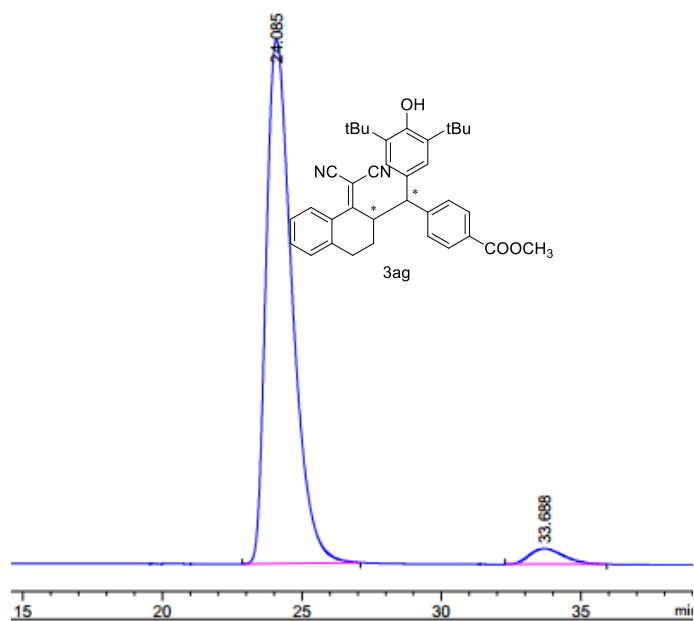

| Peak # | RetTime [min] | Type | Width [min] | Area [mAU*s] | Height [mAU] | Area %  |
|--------|---------------|------|-------------|--------------|--------------|---------|
| 1      | 24.085        | BB   | 0.9966      | 2.04761e4    | 315.74185    | 96.2082 |
| 2      | 33.688        | BB   | 1.0155      | 807.01331    | 9.40099      | 3.7918  |

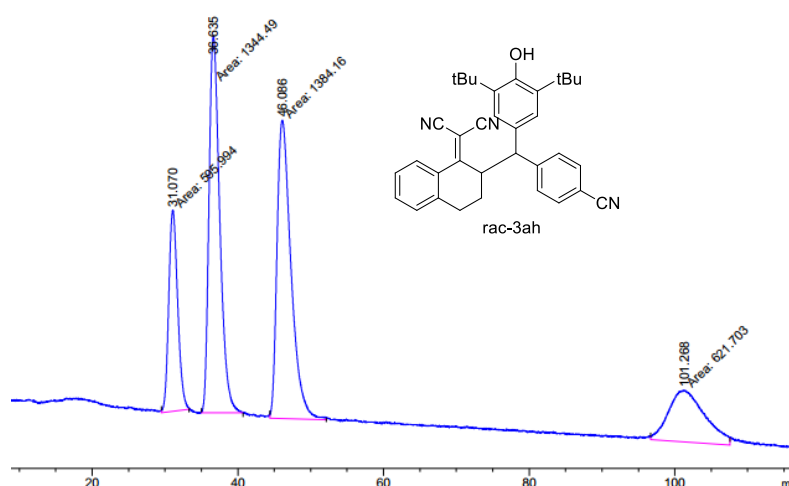

| Peak # | RetTime [min] | Type | Width [min] | Area [mAU*s] | Height [mAU] | Area %  |
|--------|---------------|------|-------------|--------------|--------------|---------|
| 1      | 31.070        | BB   | 1.0003      | 586.17096    | 6.94793      | 15.6592 |
| 2      | 36.635        | BB   | 1.1733      | 1288.61316   | 12.94515     | 34.4245 |
| 3      | 46.086        | BB   | 1.4745      | 1272.71106   | 10.15278     | 33.9997 |
| 4      | 101.271       | MM T | 5.5981      | 595.81067    | 1.77386      | 15.9167 |

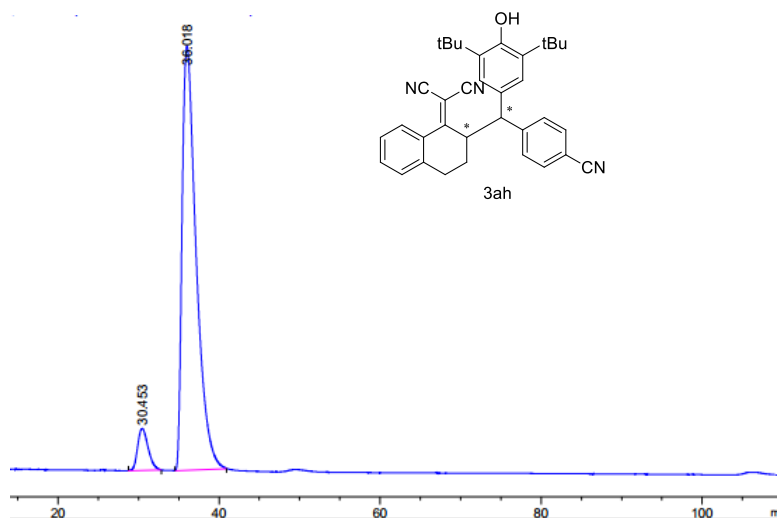

| Peak # | RetTime [min] | Type | Width [min] | Area [mAU*s] | Height [mAU] | Area %  |
|--------|---------------|------|-------------|--------------|--------------|---------|
| 1      | 30.453        | BB   | 1.0704      | 1181.38611   | 13.04736     | 6.8608  |
| 2      | 36.018        | BB   | 1.7411      | 1.60379e4    | 132.22672    | 93.1392 |

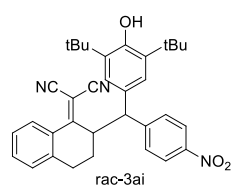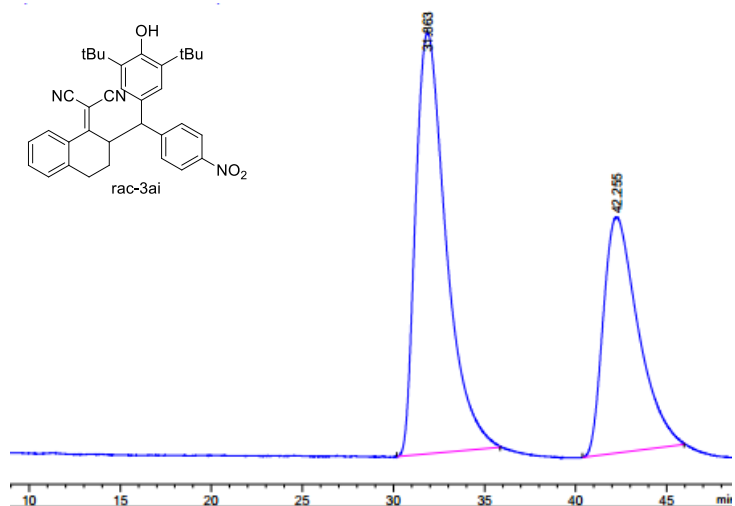

| Peak # | RetTime [min] | Type | Width [min] | Area [mAU*s] | Height [mAU] | Area %  |
|--------|---------------|------|-------------|--------------|--------------|---------|
| 1      | 31.863        | BB   | 1.6080      | 5099.86914   | 43.74910     | 60.9614 |
| 2      | 42.255        | BB   | 1.5669      | 3265.86377   | 24.53552     | 39.0386 |

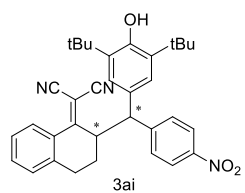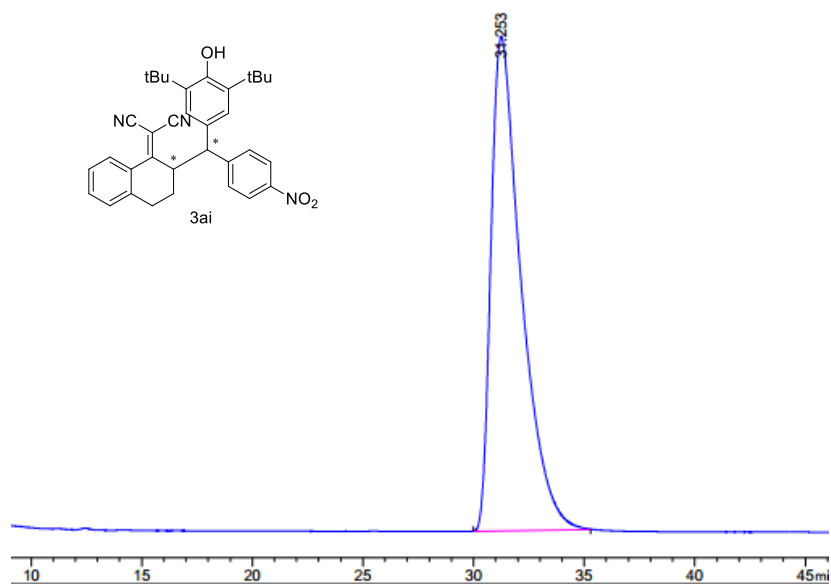

| Peak # | RetTime [min] | Type | Width [min] | Area [mAU*s] | Height [mAU] | Area %   |
|--------|---------------|------|-------------|--------------|--------------|----------|
| 1      | 31.253        | BB   | 1.3934      | 1.56185e4    | 164.54762    | 100.0000 |

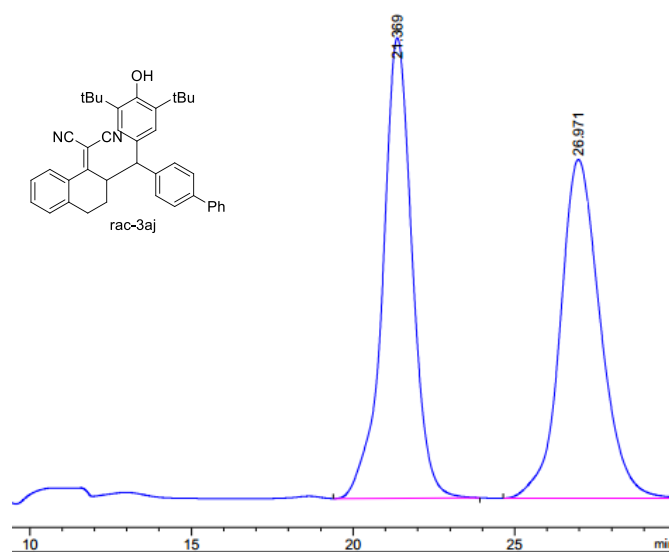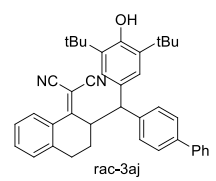

| Peak # | RetTime [min] | Type | Width [min] | Area [mAU*s] | Height [mAU] | Area %  |
|--------|---------------|------|-------------|--------------|--------------|---------|
| 1      | 21.369        | VB   | 0.9639      | 1.94542e4    | 306.74078    | 50.0520 |
| 2      | 26.971        | BBA  | 1.3080      | 1.94137e4    | 225.60011    | 49.9480 |

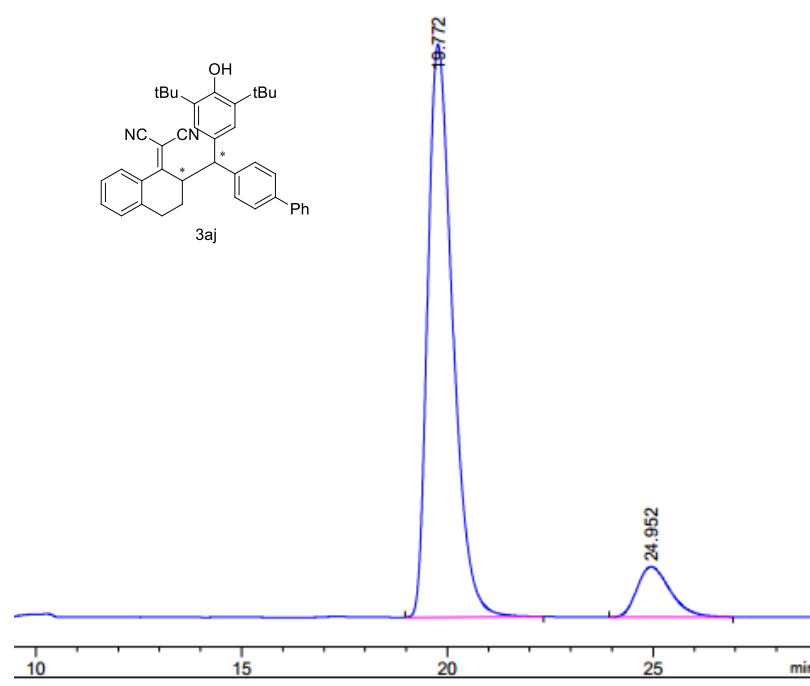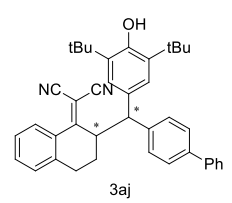

| Peak # | RetTime [min] | Type | Width [min] | Area [mAU*s] | Height [mAU] | Area %  |
|--------|---------------|------|-------------|--------------|--------------|---------|
| 1      | 19.772        | BB   | 0.6512      | 3.16288e4    | 751.25262    | 89.5198 |
| 2      | 24.952        | BB   | 0.8604      | 3702.84326   | 66.01476     | 10.4802 |

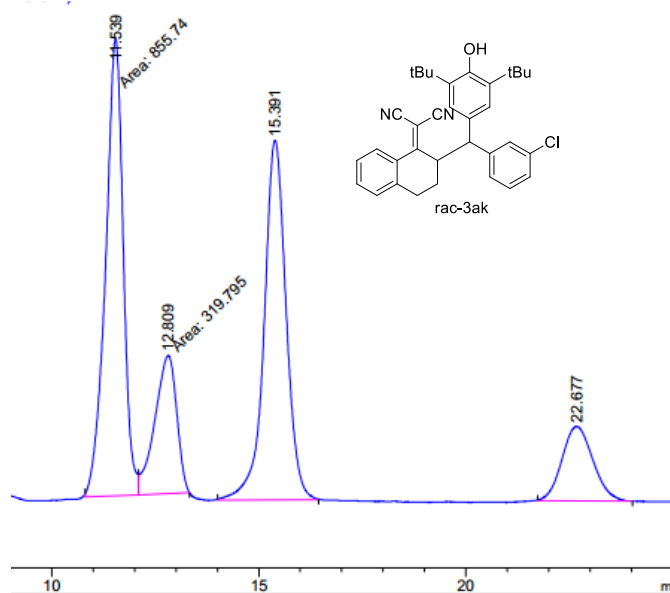

| Peak # | RetTime [min] | Type | Width [min] | Area [mAU*s] | Height [mAU] | Area %  |
|--------|---------------|------|-------------|--------------|--------------|---------|
| 1      | 11.539        | MF   | 0.4952      | 855.74017    | 28.80072     | 37.9221 |
| 2      | 12.809        | FM   | 0.6126      | 319.79453    | 8.70103      | 14.1717 |
| 3      | 15.391        | BB   | 0.5546      | 836.95258    | 22.67617     | 37.0896 |
| 4      | 22.677        | BB   | 0.6432      | 244.08440    | 4.68955      | 10.8166 |

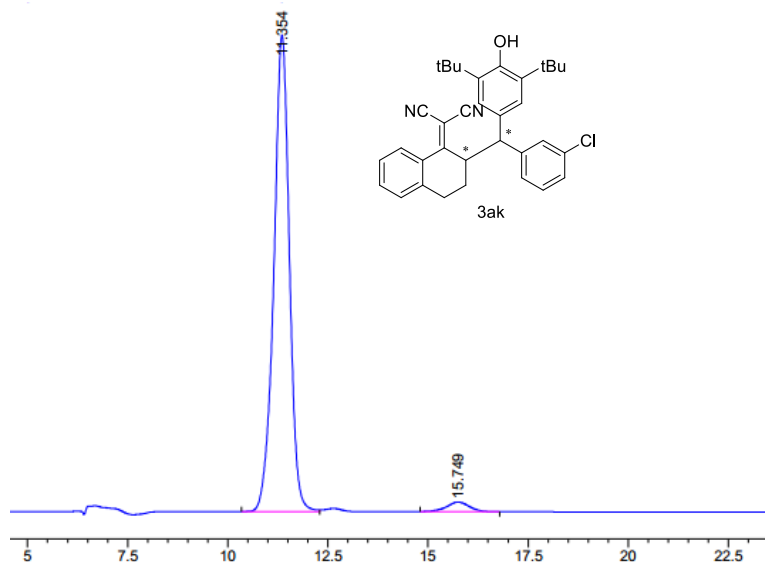

| Peak # | RetTime [min] | Type | Width [min] | Area [mAU*s] | Height [mAU] | Area %  |
|--------|---------------|------|-------------|--------------|--------------|---------|
| 1      | 11.354        | BB   | 0.4084      | 8527.61328   | 316.43628    | 97.1143 |
| 2      | 15.749        | BB   | 0.5563      | 253.39124    | 6.36742      | 2.8857  |

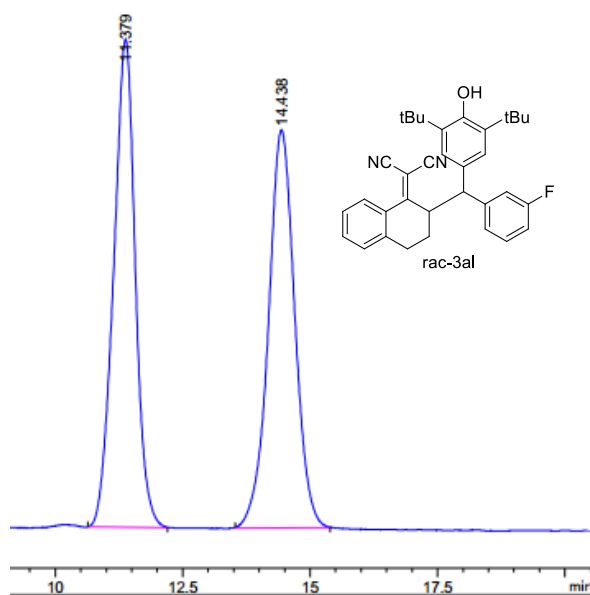

| Peak # | RetTime [min] | Type | Width [min] | Area [mAU*s] | Height [mAU] | Area %  |
|--------|---------------|------|-------------|--------------|--------------|---------|
| 1      | 11.379        | BB   | 0.4372      | 892.90454    | 30.34986     | 50.1185 |
| 2      | 14.438        | BB   | 0.5472      | 888.68347    | 24.73130     | 49.8815 |

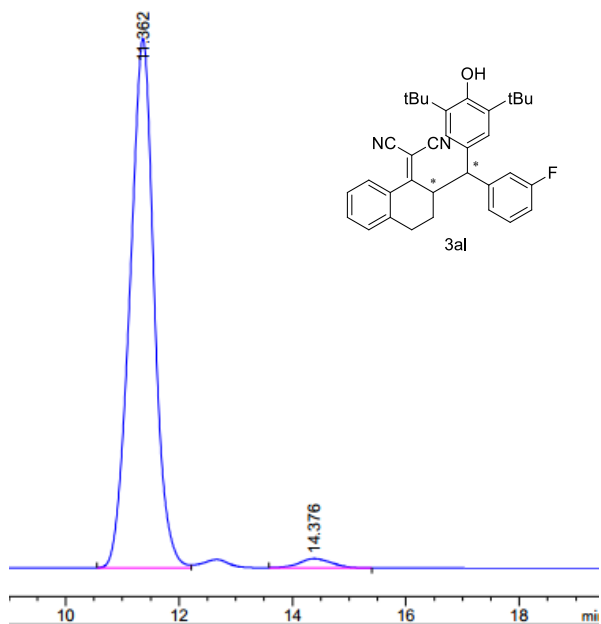

| Peak # | RetTime [min] | Type | Width [min] | Area [mAU*s] | Height [mAU] | Area %  |
|--------|---------------|------|-------------|--------------|--------------|---------|
| 1      | 11.362        | BV   | 0.4445      | 8020.31592   | 271.59613    | 97.7224 |
| 2      | 14.376        | BB   | 0.5148      | 186.92627    | 4.77371      | 2.2776  |



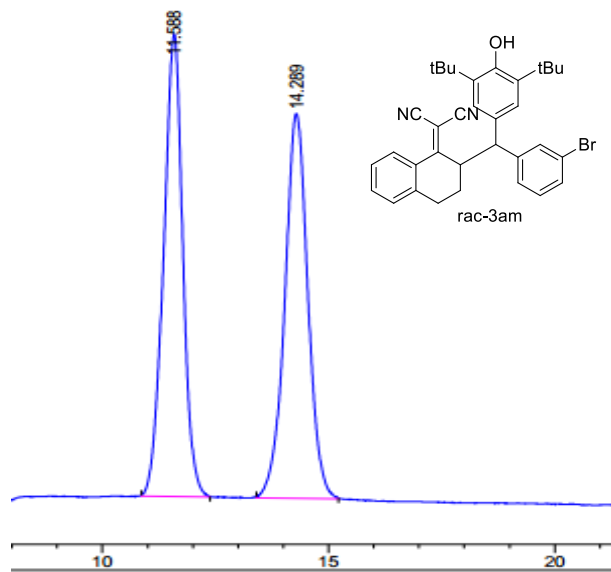

| Peak # | RetTime [min] | Type | Width [min] | Area [mAU*s] | Height [mAU] | Area %  |
|--------|---------------|------|-------------|--------------|--------------|---------|
| 1      | 11.588        | BB   | 0.4411      | 576.74896    | 19.49867     | 50.0995 |
| 2      | 14.289        | BB   | 0.5271      | 574.45917    | 16.22481     | 49.9005 |

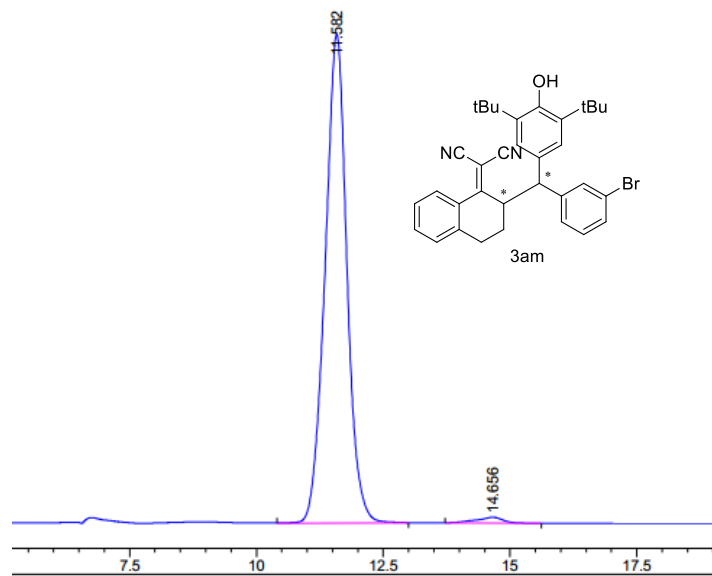

| Peak # | RetTime [min] | Type | Width [min] | Area [mAU*s] | Height [mAU] | Area %  |
|--------|---------------|------|-------------|--------------|--------------|---------|
| 1      | 11.582        | VB   | 0.4481      | 1.03567e4    | 347.10953    | 98.5551 |
| 2      | 14.656        | BB   | 0.5045      | 151.83305    | 4.11517      | 1.4449  |

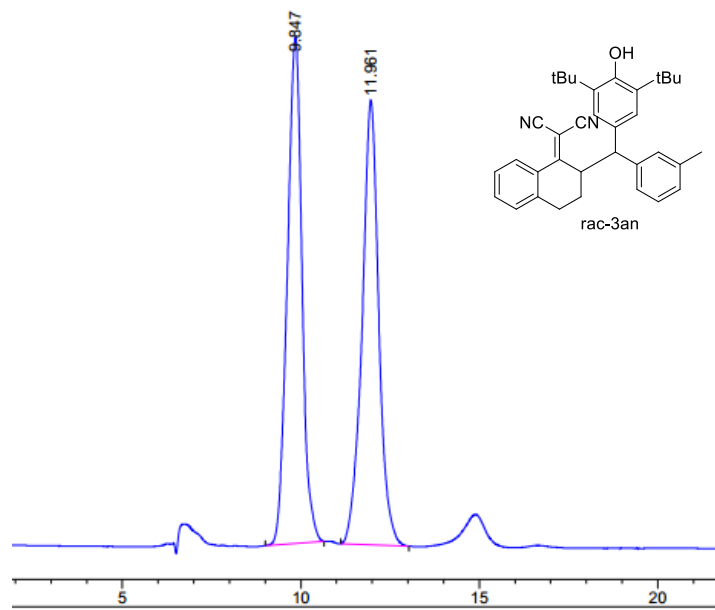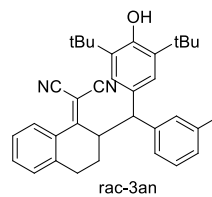

| Peak # | RetTime [min] | Type | Width [min] | Area [mAU*s] | Height [mAU] | Area %  |
|--------|---------------|------|-------------|--------------|--------------|---------|
| 1      | 9.847         | BB   | 0.4393      | 2056.07593   | 71.97681     | 50.1132 |
| 2      | 11.961        | BB   | 0.4799      | 2046.78784   | 63.19711     | 49.8868 |

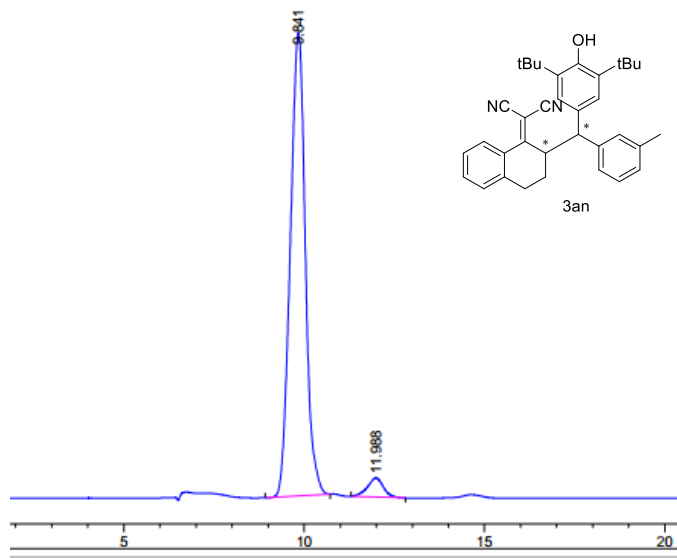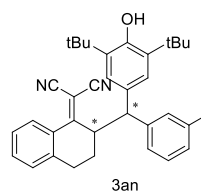

| Peak # | RetTime [min] | Type | Width [min] | Area [mAU*s] | Height [mAU] | Area %  |
|--------|---------------|------|-------------|--------------|--------------|---------|
| 1      | 9.841         | BB   | 0.4483      | 7368.78857   | 255.66217    | 95.7761 |
| 2      | 11.988        | BB   | 0.4535      | 324.97989    | 10.54687     | 4.2239  |

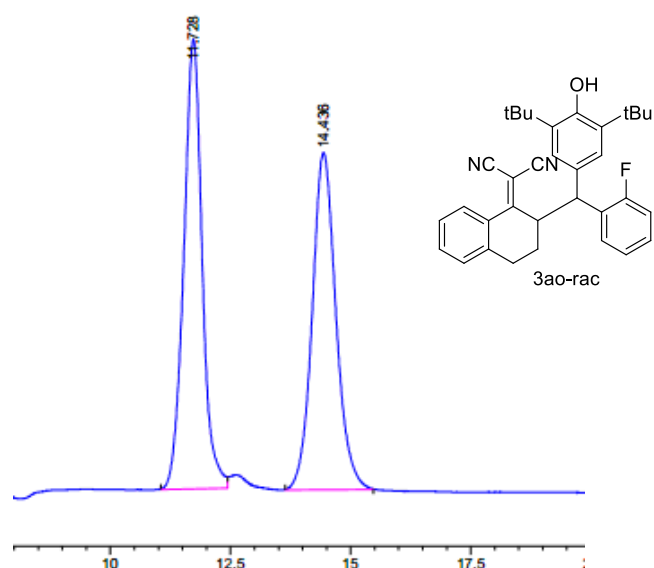

| Peak # | RetTime [min] | Type | Width [min] | Area [mAU*s] | Height [mAU] | Area %  |
|--------|---------------|------|-------------|--------------|--------------|---------|
| 1      | 11.728        | BB   | 0.4002      | 909.35266    | 34.20288     | 50.8068 |
| 2      | 14.436        | BB   | 0.5246      | 880.47046    | 25.64507     | 49.1932 |

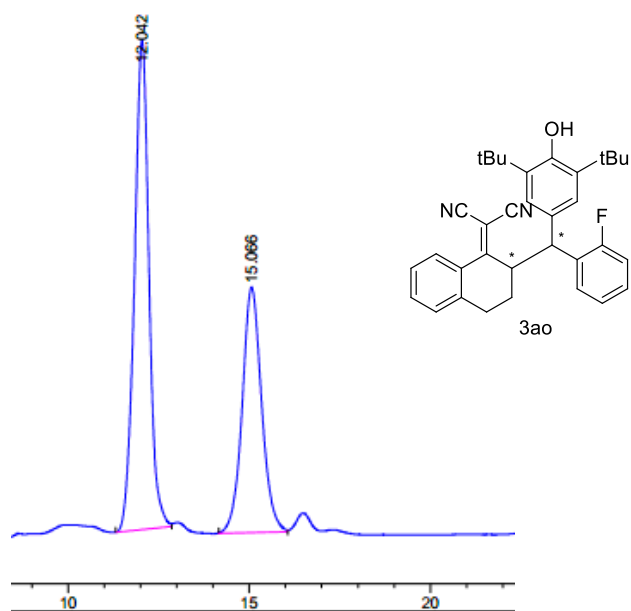

| Peak # | RetTime [min] | Type | Width [min] | Area [mAU*s] | Height [mAU] | Area %  |
|--------|---------------|------|-------------|--------------|--------------|---------|
| 1      | 12.042        | BB   | 0.4192      | 1103.68005   | 39.59580     | 59.8452 |
| 2      | 15.066        | BB   | 0.5584      | 740.54517    | 19.88861     | 40.1548 |

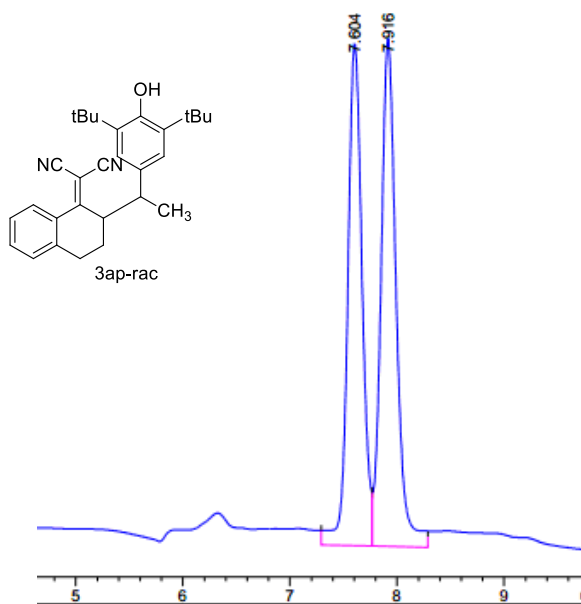

| Peak # | RetTime [min] | Type | Width [min] | Area [mAU*s] | Height [mAU] | Area %  |
|--------|---------------|------|-------------|--------------|--------------|---------|
| 1      | 7.604         | VV   | 0.1410      | 1316.05505   | 140.82602    | 48.4184 |
| 2      | 7.916         | VB   | 0.1489      | 1402.03162   | 142.33968    | 51.5816 |

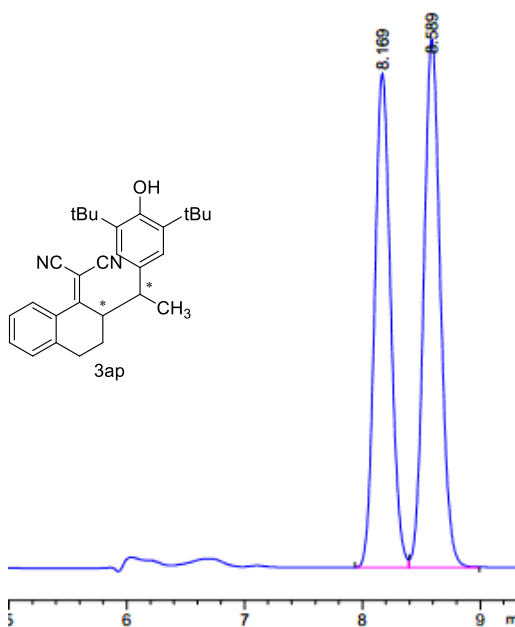

| Peak # | RetTime [min] | Type | Width [min] | Area [mAU*s] | Height [mAU] | Area %  |
|--------|---------------|------|-------------|--------------|--------------|---------|
| 1      | 8.169         | EV   | 0.1461      | 926.89667    | 98.23972     | 47.3741 |
| 2      | 8.589         | VB   | 0.1524      | 1029.65063   | 105.04683    | 52.6259 |

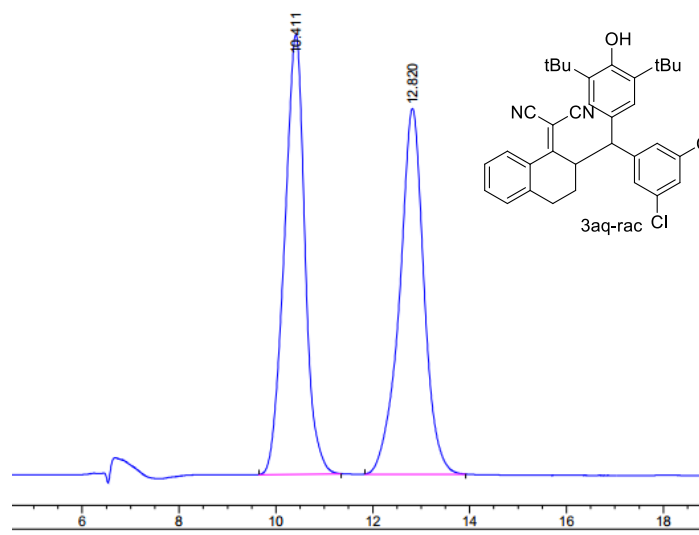

| Peak # | RetTime [min] | Type | Width [min] | Area [mAU*s] | Height [mAU] | Area %  |
|--------|---------------|------|-------------|--------------|--------------|---------|
| 1      | 10.411        | BB   | 0.4423      | 2202.16357   | 75.06171     | 50.1259 |
| 2      | 12.820        | BB   | 0.5175      | 2191.10474   | 62.42304     | 49.8741 |

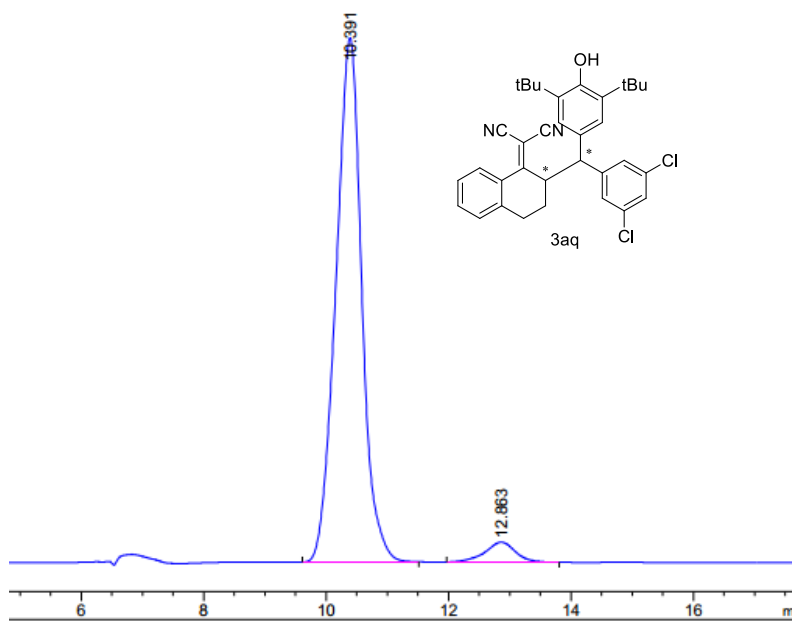

| Peak # | RetTime [min] | Type | Width [min] | Area [mAU*s] | Height [mAU] | Area %  |
|--------|---------------|------|-------------|--------------|--------------|---------|
| 1      | 10.391        | BB   | 0.4422      | 7640.63574   | 260.51291    | 95.6456 |
| 2      | 12.863        | BB   | 0.5150      | 347.84738    | 9.97002      | 4.3544  |

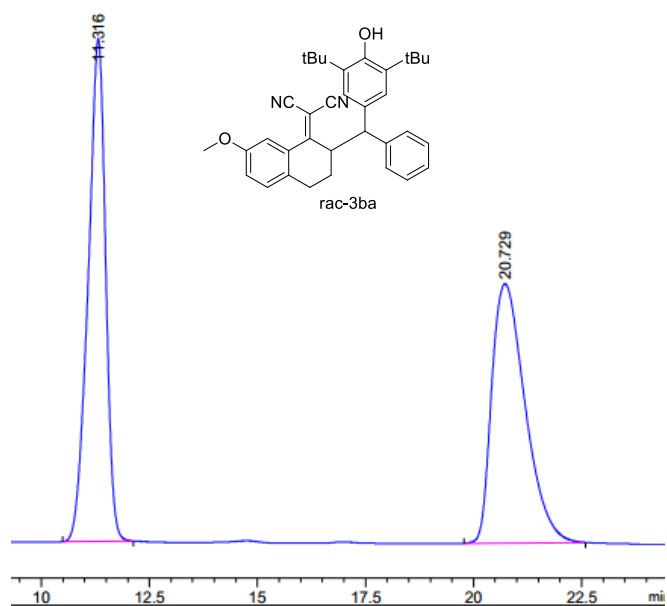

| Peak # | RetTime [min] | Type | Width [min] | Area [mAU*s] | Height [mAU] | Area %  |
|--------|---------------|------|-------------|--------------|--------------|---------|
| 1      | 11.316        | BB   | 0.4176      | 3217.39966   | 114.57600    | 50.3040 |
| 2      | 20.729        | BB   | 0.8233      | 3178.51489   | 59.11327     | 49.6960 |

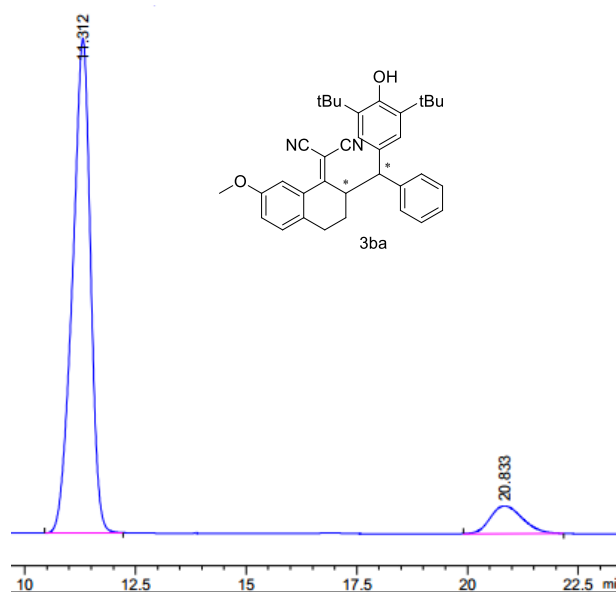

| Peak # | RetTime [min] | Type | Width [min] | Area [mAU*s] | Height [mAU] | Area %  |
|--------|---------------|------|-------------|--------------|--------------|---------|
| 1      | 11.312        | BB   | 0.4195      | 5359.28125   | 189.72858    | 90.8169 |
| 2      | 20.833        | BB   | 0.7234      | 541.91138    | 10.65501     | 9.1831  |

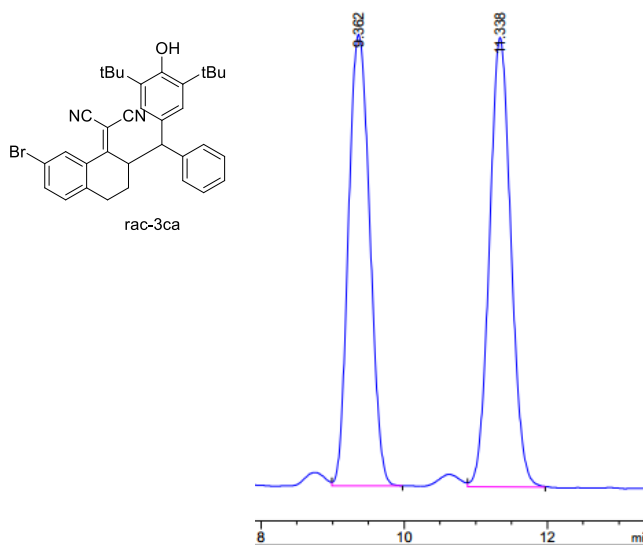

| Peak # | RetTime [min] | Type | Width [min] | Area [mAU*s] | Height [mAU] | Area %  |
|--------|---------------|------|-------------|--------------|--------------|---------|
| 1      | 9.362         | VB   | 0.3333      | 802.09442    | 38.77528     | 49.8702 |
| 2      | 11.338        | VB   | 0.3236      | 806.27026    | 38.61765     | 50.1298 |

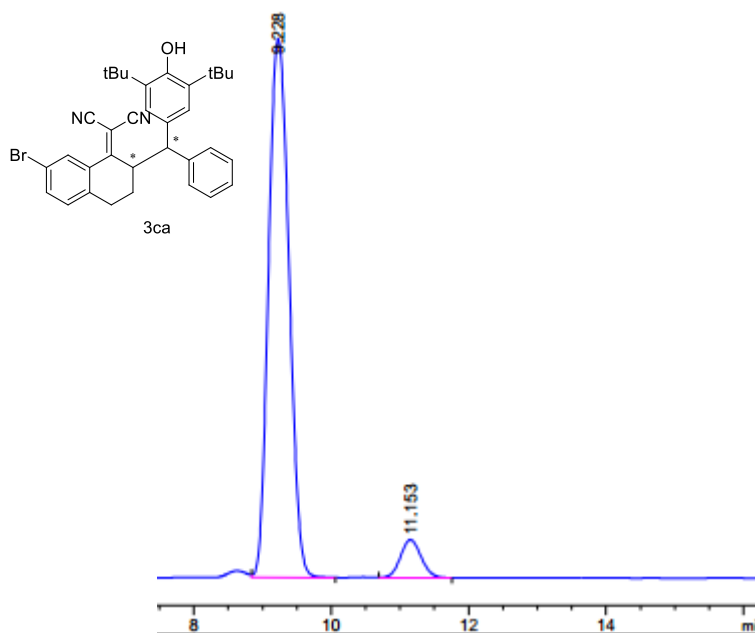

| Peak # | RetTime [min] | Type | Width [min] | Area [mAU*s] | Height [mAU] | Area %  |
|--------|---------------|------|-------------|--------------|--------------|---------|
| 1      | 9.228         | VB   | 0.3331      | 5473.47119   | 264.82690    | 93.3172 |
| 2      | 11.153        | VB   | 0.3264      | 391.97430    | 18.71007     | 6.6828  |

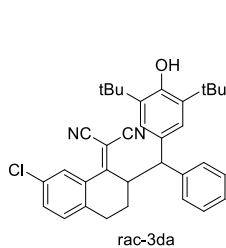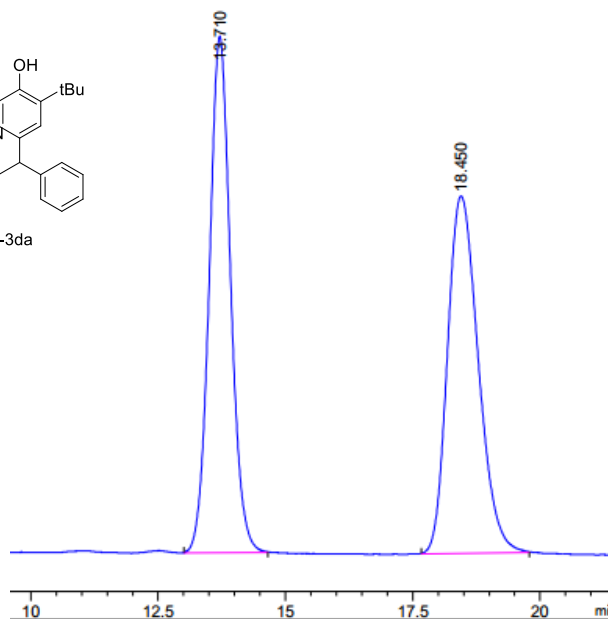

| Peak # | RetTime [min] | Type | Width [min] | Area [mAU*s] | Height [mAU] | Area %  |
|--------|---------------|------|-------------|--------------|--------------|---------|
| 1      | 13.710        | BB   | 0.4435      | 1335.07690   | 45.88496     | 49.9995 |
| 2      | 18.450        | BB   | 0.6559      | 1335.10364   | 31.79351     | 50.0005 |

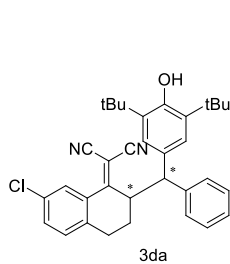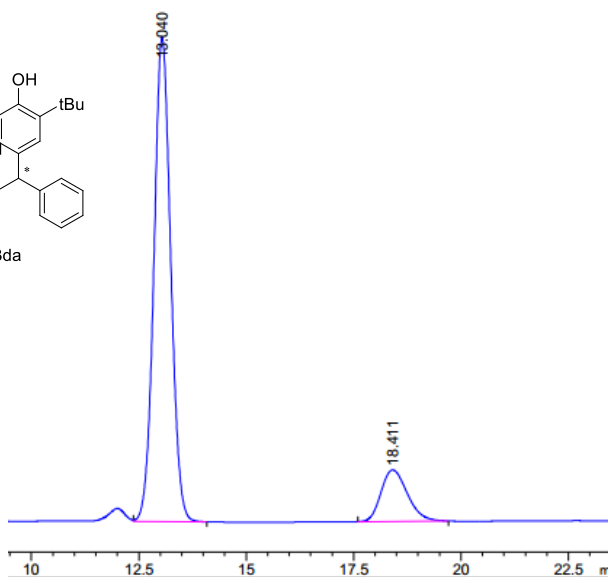

| Peak # | RetTime [min] | Type | Width [min] | Area [mAU*s] | Height [mAU] | Area %  |
|--------|---------------|------|-------------|--------------|--------------|---------|
| 1      | 13.040        | VB   | 0.4188      | 7261.20752   | 267.39682    | 85.6473 |
| 2      | 18.411        | BB   | 0.6608      | 1216.82886   | 28.45995     | 14.3527 |



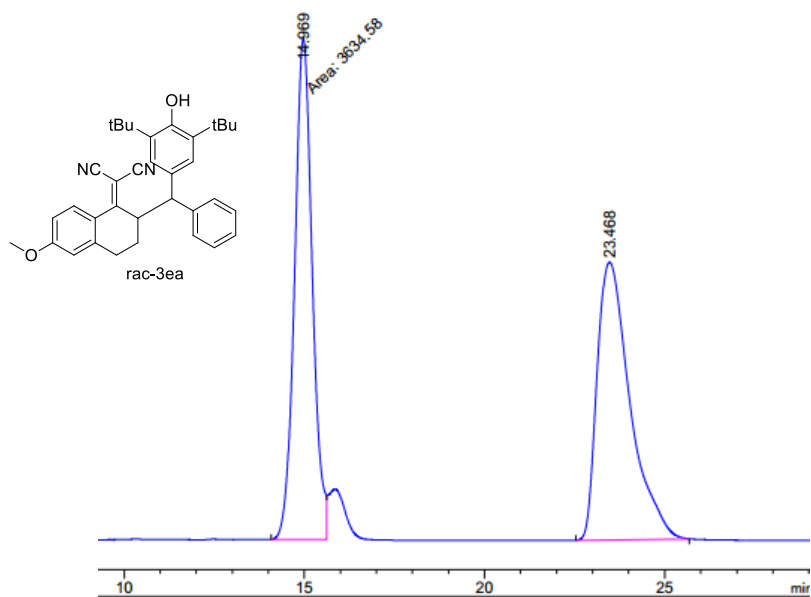

| Peak # | RetTime [min] | Type | Width [min] | Area [mAU*s] | Height [mAU] | Area %  |
|--------|---------------|------|-------------|--------------|--------------|---------|
| 1      | 14.969        | MF   | 0.5701      | 3634.57520   | 106.26124    | 49.2982 |
| 2      | 23.468        | BB   | 0.9664      | 3738.06055   | 58.90547     | 50.7018 |

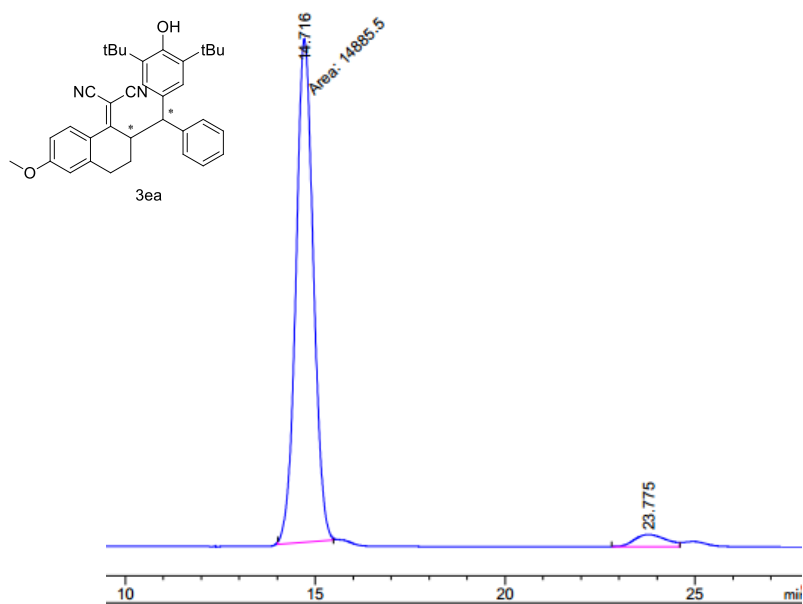

| Peak # | RetTime [min] | Type | Width [min] | Area [mAU*s] | Height [mAU] | Area %  |
|--------|---------------|------|-------------|--------------|--------------|---------|
| 1      | 14.716        | MM T | 0.5318      | 1.48855e4    | 466.49179    | 95.8884 |
| 2      | 23.775        | BV   | 0.8254      | 638.27435    | 11.09132     | 4.1116  |

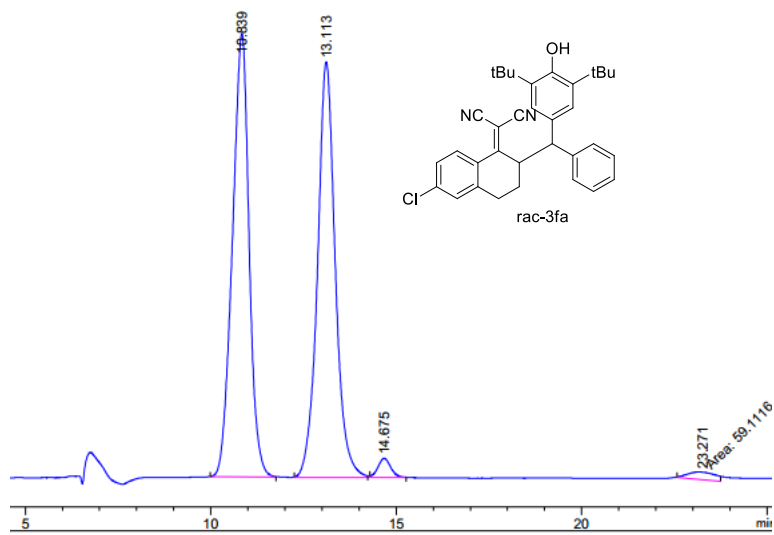

| Peak # | RetTime [min] | Type | Width [min] | Area [mAU*s] | Height [mAU] | Area %  |
|--------|---------------|------|-------------|--------------|--------------|---------|
| 1      | 10.839        | BB   | 0.4702      | 2173.25342   | 69.60928     | 48.5928 |
| 2      | 13.113        | BB   | 0.4979      | 2168.46143   | 65.21452     | 48.4856 |
| 3      | 14.675        | BB   | 0.3507      | 71.55264     | 2.99480      | 1.5999  |
| 4      | 23.271        | MM T | 0.8427      | 59.11160     | 1.16916      | 1.3217  |

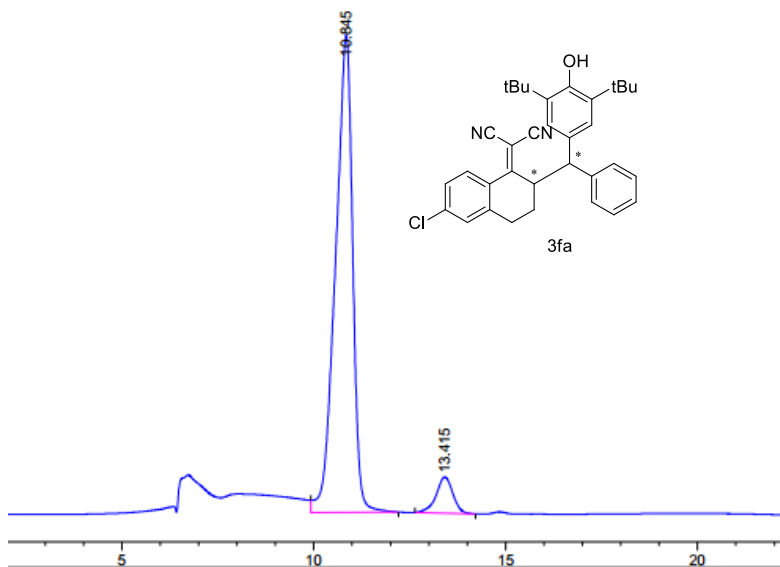

| Peak # | RetTime [min] | Type | Width [min] | Area [mAU*s] | Height [mAU] | Area %  |
|--------|---------------|------|-------------|--------------|--------------|---------|
| 1      | 10.845        | VB   | 0.4476      | 4369.84912   | 140.21834    | 93.1127 |
| 2      | 13.415        | BB   | 0.4572      | 323.22437    | 10.61732     | 6.8873  |

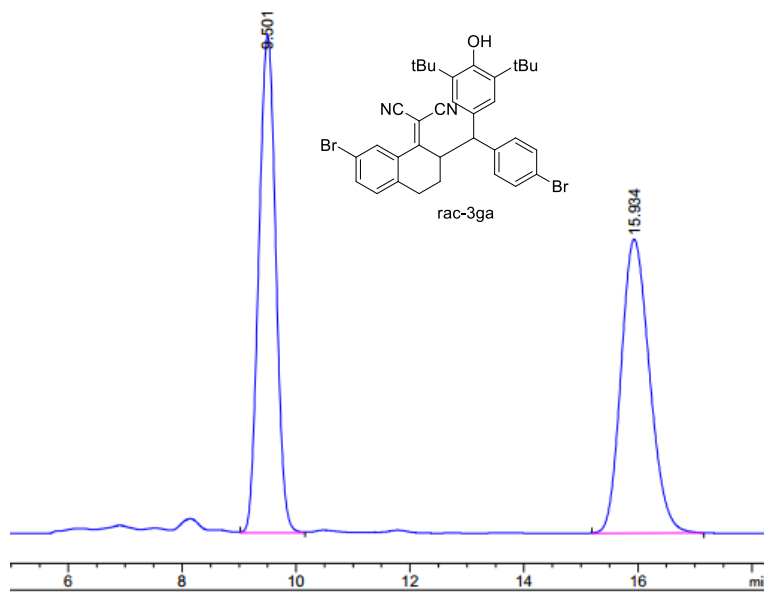

| Peak # | RetTime [min] | Type | Width [min] | Area [mAU*s] | Height [mAU] | Area %  |
|--------|---------------|------|-------------|--------------|--------------|---------|
| 1      | 9.501         | BB   | 0.3317      | 2782.28760   | 134.29787    | 50.3042 |
| 2      | 15.934        | BB   | 0.5420      | 2748.63965   | 79.36874     | 49.6958 |

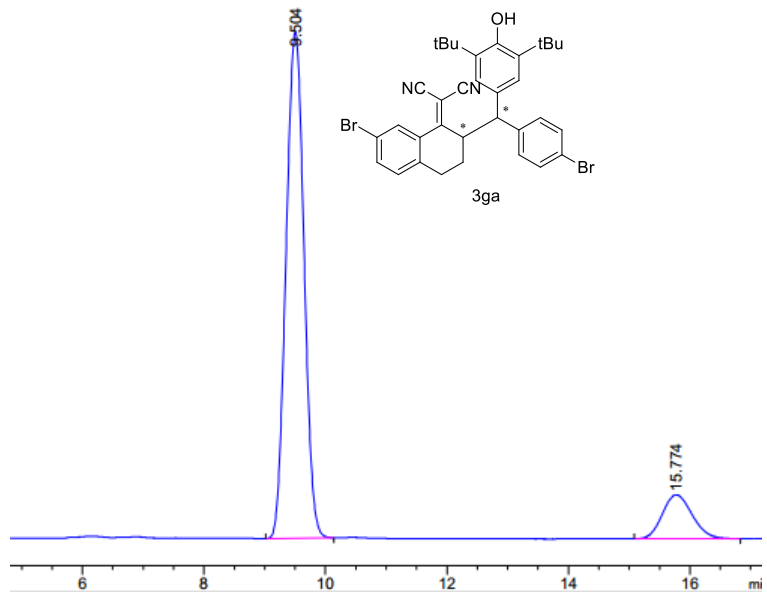

| Peak # | RetTime [min] | Type | Width [min] | Area [mAU*s] | Height [mAU] | Area %  |
|--------|---------------|------|-------------|--------------|--------------|---------|
| 1      | 9.504         | BB   | 0.3292      | 7260.87744   | 354.17154    | 87.3030 |
| 2      | 15.774        | BB   | 0.5353      | 1055.99182   | 30.85729     | 12.6970 |

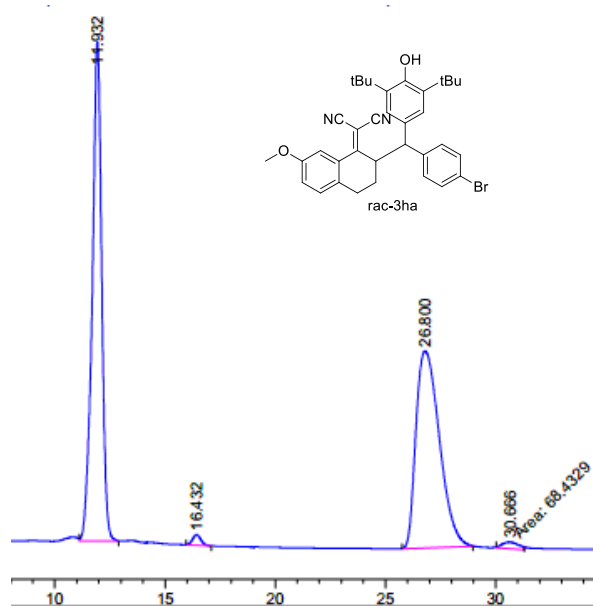

| Peak # | RetTime [min] | Type | Width [min] | Area [mAU*s] | Height [mAU] | Area %  |
|--------|---------------|------|-------------|--------------|--------------|---------|
| 1      | 11.932        | VB   | 0.4448      | 2962.60913   | 99.10355     | 49.5502 |
| 2      | 16.432        | BB   | 0.3879      | 54.32132     | 2.09906      | 0.9085  |
| 3      | 26.800        | BB   | 1.1662      | 2893.64185   | 39.06584     | 48.3967 |
| 4      | 30.666        | MM   | 0.8721      | 68.43294     | 1.30786      | 1.1446  |

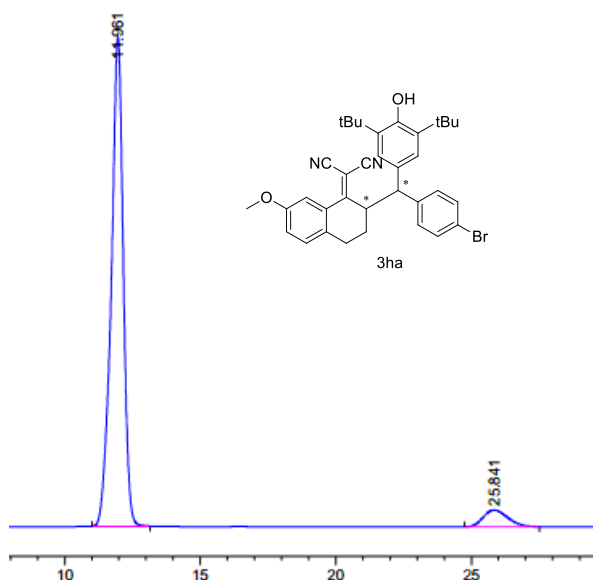

| Peak # | RetTime [min] | Type | Width [min] | Area [mAU*s] | Height [mAU] | Area %  |
|--------|---------------|------|-------------|--------------|--------------|---------|
| 1      | 11.961        | BB   | 0.4564      | 1.00903e4    | 328.49875    | 93.4003 |
| 2      | 25.841        | BB   | 0.8857      | 712.98718    | 11.24463     | 6.5997  |

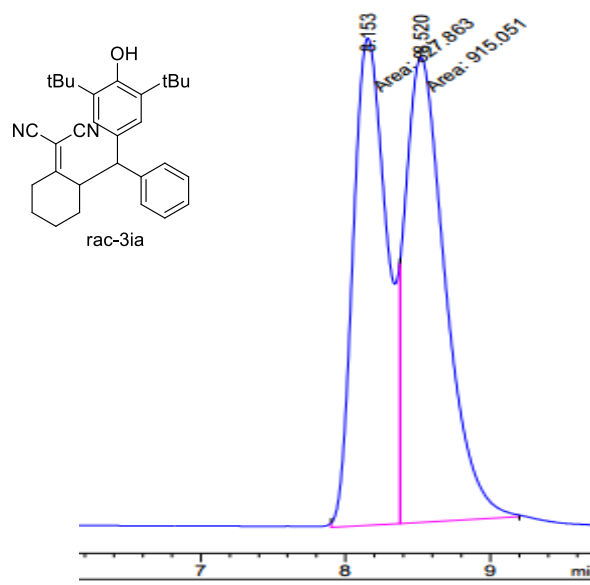

| Peak # | RetTime [min] | Type | Width [min] | Area [mAU*s] | Height [mAU] | Area %  |
|--------|---------------|------|-------------|--------------|--------------|---------|
| 1      | 8.153         | MF   | 0.2729      | 827.86285    | 50.56288     | 47.4988 |
| 2      | 8.520         | FM   | 0.3159      | 915.05072    | 48.28263     | 52.5012 |

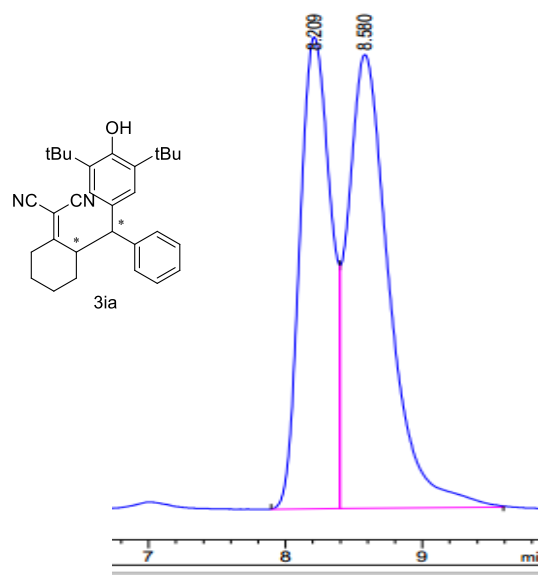

| Peak # | RetTime [min] | Type | Width [min] | Area [mAU*s] | Height [mAU] | Area %  |
|--------|---------------|------|-------------|--------------|--------------|---------|
| 1      | 8.209         | BV   | 0.2433      | 365.99634    | 23.29137     | 43.5918 |
| 2      | 8.580         | VB   | 0.3126      | 473.60355    | 22.40889     | 56.4082 |

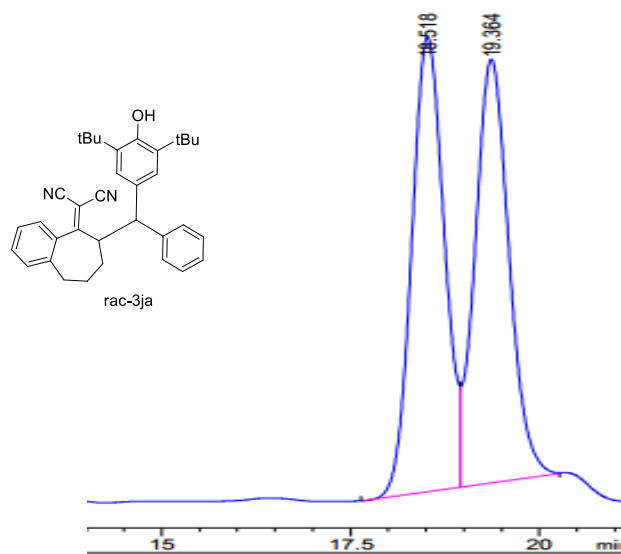

| Peak # | RetTime [min] | Type | Width [min] | Area [mAU*s] | Height [mAU] | Area %  |
|--------|---------------|------|-------------|--------------|--------------|---------|
| 1      | 18.518        | BV   | 0.4628      | 3807.95068   | 127.36438    | 50.5616 |
| 2      | 19.364        | VB   | 0.4842      | 3723.35693   | 118.62897    | 49.4384 |

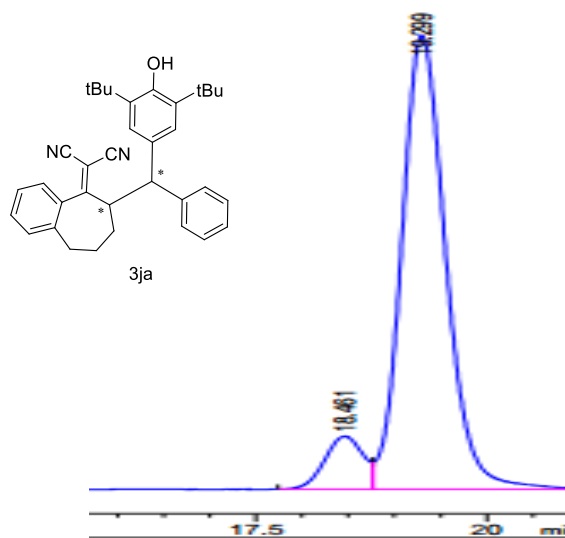

| Peak # | RetTime [min] | Type | Width [min] | Area [mAU*s] | Height [mAU] | Area %  |
|--------|---------------|------|-------------|--------------|--------------|---------|
| 1      | 18.461        | BV   | 0.4453      | 1000.85339   | 34.82912     | 9.2063  |
| 2      | 19.299        | VBA  | 0.5101      | 9870.58887   | 298.23688    | 90.7937 |

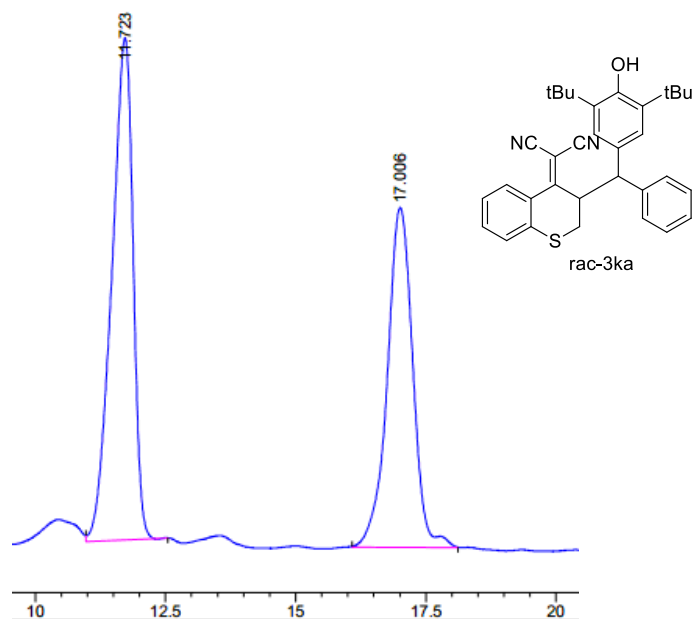

| Peak # | RetTime [min] | Type | Width [min] | Area [mAU*s] | Height [mAU] | Area %  |
|--------|---------------|------|-------------|--------------|--------------|---------|
| 1      | 11.723        | VB   | 0.4253      | 719.79681    | 25.34511     | 55.2285 |
| 2      | 17.006        | BB   | 0.5272      | 583.50928    | 17.13687     | 44.7715 |

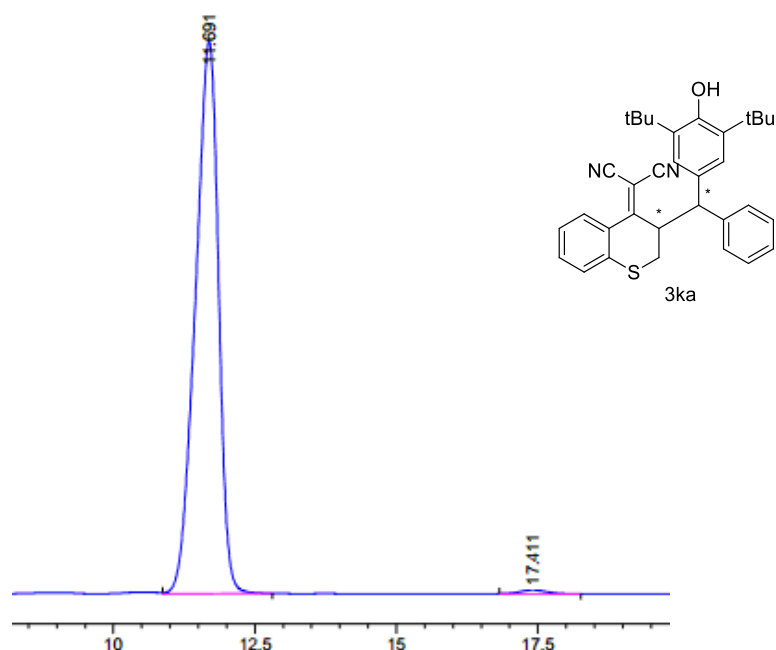

| Peak # | RetTime [min] | Type | Width [min] | Area [mAU*s] | Height [mAU] | Area %  |
|--------|---------------|------|-------------|--------------|--------------|---------|
| 1      | 11.691        | VB   | 0.4256      | 9994.12012   | 353.78693    | 99.1641 |
| 2      | 17.411        | BB   | 0.4701      | 84.24352     | 2.55853      | 0.8359  |

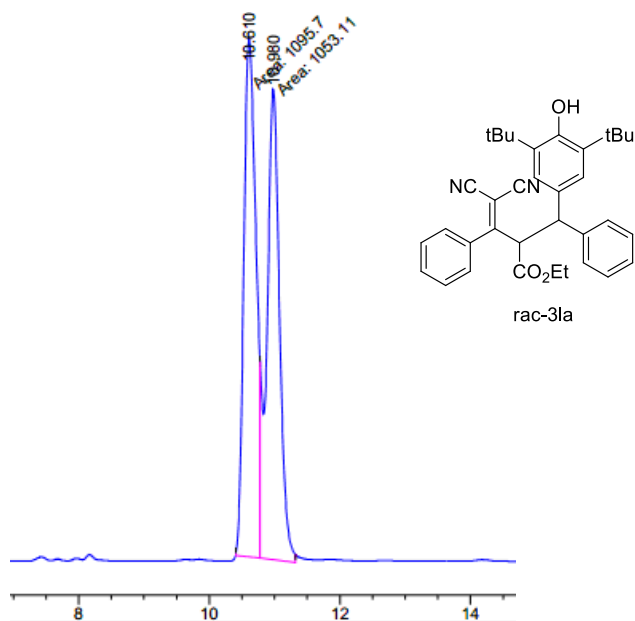

| Peak # | RetTime [min] | Type | Width [min] | Area [mAU*s] | Height [mAU] | Area %  |
|--------|---------------|------|-------------|--------------|--------------|---------|
| 1      | 10.610        | MF   | 0.2131      | 1095.70142   | 85.68573     | 50.9910 |
| 2      | 10.980        | FM   | 0.2258      | 1053.11096   | 77.72159     | 49.0090 |

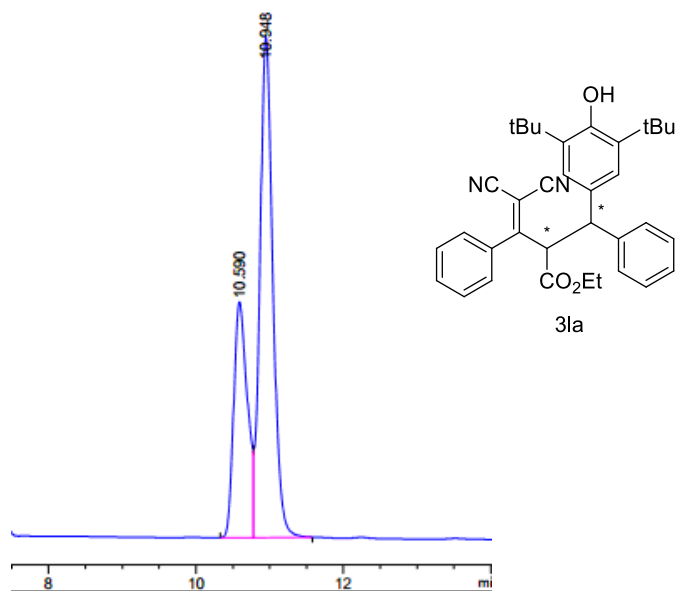

| Peak # | RetTime [min] | Type | Width [min] | Area [mAU*s] | Height [mAU] | Area %  |
|--------|---------------|------|-------------|--------------|--------------|---------|
| 1      | 10.590        | BV   | 0.1954      | 766.28302    | 59.05068     | 33.2902 |
| 2      | 10.948        | VB   | 0.1869      | 1535.54175   | 125.35744    | 66.7098 |



## 9. X-ray crystal structure of 3ae

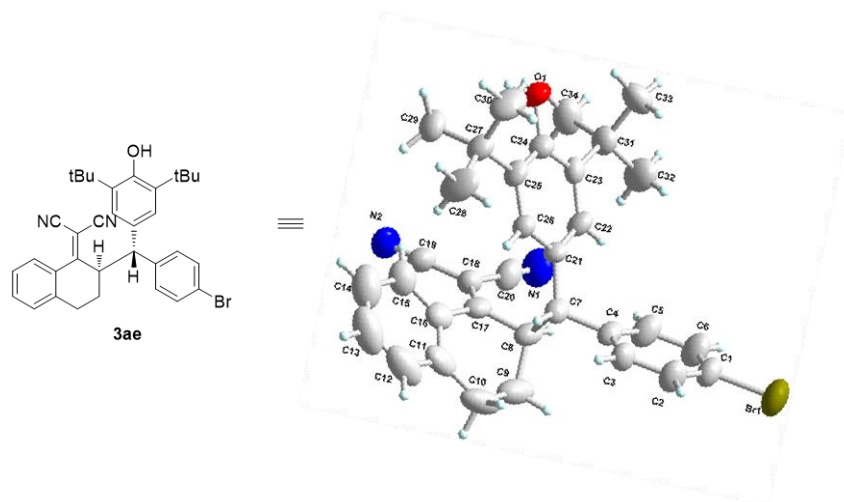

|                              |                         |                                  |                          |
|------------------------------|-------------------------|----------------------------------|--------------------------|
| Bond precision:              | C-C = 0.0131 Å          | Wavelength=0.71073               |                          |
| Cell:                        | a=10.839(5)<br>alpha=90 | b=23.282(10)<br>beta=90          | c=24.360(11)<br>gamma=90 |
| Temperature:                 | 296 K                   |                                  |                          |
|                              | Calculated              | Reported                         |                          |
| Volume                       | 6147(5)                 | 6147(5)                          |                          |
| Space group                  | P 21 21 21              | P 21 21 21                       |                          |
| Hall group                   | P 2ac 2ab               | P 2ac 2ab                        |                          |
| Moiety formula               | C34 H35 Br N2 O         | ?                                |                          |
| Sum formula                  | C34 H35 Br N2 O         | C34 H35 Br N2 O                  |                          |
| Mr                           | 567.54                  | 567.55                           |                          |
| Dx, g cm-3                   | 1.227                   | 1.226                            |                          |
| Z                            | 8                       | 8                                |                          |
| Mu (mm-1)                    | 1.365                   | 1.364                            |                          |
| F000                         | 2368.0                  | 2368.0                           |                          |
| F000'                        | 2366.47                 |                                  |                          |
| h, k, lmax                   | 12, 27, 28              | 12, 27, 28                       |                          |
| Nref                         | 10822[ 5994]            | 10820                            |                          |
| Tmin, Tmax                   | 0.689, 0.741            |                                  |                          |
| Tmin'                        | 0.676                   |                                  |                          |
| Correction method= Not given |                         |                                  |                          |
| Data completeness=           | 1.81/1.00               | Theta(max)= 25.005               |                          |
| R(reflections)=              | 0.0547( 4970)           | wR2(reflections)= 0.1408( 10820) |                          |
| S =                          | 0.958                   | Npar= 701                        |                          |
